# Supplementary material for: The mammalian decidual cell evolved from a cellular stress response
Source: PLoS Biol. 2018 Aug 24;16(8):e2005594. doi: 10.1371/journal.pbio.2005594 (PMC6108454; doi:10.1371/journal.pbio.2005594)
Supplement: S1 Data — (XLSX) [file pbio.2005594.s016.xlsx]

## Sheet: Fig1E
GO Term	Description	P-value	FDR q-value	Enrichment	N	B	n	b	Genes
GO:0016491	oxidoreductase activity	2.96e-11	1.24e-07	1.82	12256	505	1560	117	[NDUFAF5 - nadh dehydrogenase (ubiquinone) complex i, assembly factor 5, PRDX6 - peroxiredoxin 6, SDHC - succinate dehydrogenase complex, subunit c, integral membrane protein, 15kda, HSD17B2 - hydroxysteroid (17-beta) dehydrogenase 2, COX5B - cytochrome c oxidase subunit vb, PDIA4 - protein disulfide isomerase family a, member 4, NDUFA2 - nadh dehydrogenase (ubiquinone) 1 alpha subcomplex, 2, 8kd…
GO:0003824	catalytic activity	1.23e-07	0.000257	1.17	12256	4273	1560	636	[PRDX6 - peroxiredoxin 6, GGCX - gamma-glutamyl carboxylase, PDIA4 - protein disulfide isomerase family a, member 4, COX5B - cytochrome c oxidase subunit vb, AMACR - alpha-methylacyl-coa racemase, ABCA1 - atp-binding cassette, sub-family a (abc1), member 1, CP - ceruloplasmin (ferroxidase), ABL2 - c-abl oncogene 2, non-receptor tyrosine kinase, CYP39A1 - cytochrome p450, family 39, subfamily a, p…
GO:0016614	oxidoreductase activity, acting on CH-OH group of donors	9.14e-06	0.0128	2.43	12256	84	1560	26	[XDH - xanthine dehydrogenase, HSD17B2 - hydroxysteroid (17-beta) dehydrogenase 2, MDH1 - malate dehydrogenase 1, nad (soluble), PGD - phosphogluconate dehydrogenase, DHCR24 - 24-dehydrocholesterol reductase, ZADH2 - zinc binding alcohol dehydrogenase domain containing 2, AOX1 - aldehyde oxidase 1, GPD2 - glycerol-3-phosphate dehydrogenase 2 (mitochondrial), FASN - fatty acid synthase, DHRS3 - de…
GO:0046961	proton-transporting ATPase activity, rotational mechanism	9.41e-06	0.00988	5.05	12256	14	1560	9	[ATP6V1H - atpase, h+ transporting, lysosomal 50/57kda, v1 subunit h, ATP6V0B - atpase, h+ transporting, lysosomal 21kda, v0 subunit b, ATP6V0A1 - atpase, h+ transporting, lysosomal v0 subunit a1, ATP6AP1 - atpase, h+ transporting, lysosomal accessory protein 1, ATP6V0D2 - atpase, h+ transporting, lysosomal 38kda, v0 subunit d2, ATP6V0E1 - atpase, h+ transporting, lysosomal 9kda, v0 subunit e1, A…
GO:0030291	protein serine/threonine kinase inhibitor activity	1.28e-05	0.0108	3.65	12256	28	1560	13	[WNK1 - wnk lysine deficient protein kinase 1, CDKN2A - cyclin-dependent kinase inhibitor 2a, CDKN1B - cyclin-dependent kinase inhibitor 1b (p27, kip1), CDKN1A - cyclin-dependent kinase inhibitor 1a (p21, cip1), FAM212A - family with sequence similarity 212, member a, CDKN2D - cyclin-dependent kinase inhibitor 2d (p19, inhibits cdk4), CDKN2C - cyclin-dependent kinase inhibitor 2c (p18, inhibits c…
GO:0019900	kinase binding	1.7e-05	0.0119	1.51	12256	493	1560	95	[TOB1 - transducer of erbb2, 1, EMP2 - epithelial membrane protein 2, CAMK2N2 - calcium/calmodulin-dependent protein kinase ii inhibitor 2, PIK3IP1 - phosphoinositide-3-kinase interacting protein 1, WNK1 - wnk lysine deficient protein kinase 1, SOCS1 - suppressor of cytokine signaling 1, GADD45A - growth arrest and dna-damage-inducible, alpha, UTRN - utrophin, SIK1 - salt-inducible kinase 1, KIF1…
GO:0036442	hydrogen-exporting ATPase activity	2.09e-05	0.0125	4.71	12256	15	1560	9	[ATP6V1H - atpase, h+ transporting, lysosomal 50/57kda, v1 subunit h, ATP6V0B - atpase, h+ transporting, lysosomal 21kda, v0 subunit b, ATP6V0A1 - atpase, h+ transporting, lysosomal v0 subunit a1, ATP6AP1 - atpase, h+ transporting, lysosomal accessory protein 1, ATP6V0D2 - atpase, h+ transporting, lysosomal 38kda, v0 subunit d2, ATP6V0E1 - atpase, h+ transporting, lysosomal 9kda, v0 subunit e1, A…
GO:0016209	antioxidant activity	2.21e-05	0.0116	2.66	12256	59	1560	20	[IYD - iodotyrosine deiodinase, PRDX6 - peroxiredoxin 6, CAT - catalase, GPX3 - glutathione peroxidase 3 (plasma), FAM213A - family with sequence similarity 213, member a, TP53INP1 - tumor protein p53 inducible nuclear protein 1, DUOX1 - dual oxidase 1, PRDX4 - peroxiredoxin 4, SESN1 - sestrin 1, FAM213B - family with sequence similarity 213, member b, PXDNL - peroxidasin homolog (drosophila)-lik…
GO:0008081	phosphoric diester hydrolase activity	2.28e-05	0.0106	2.37	12256	83	1560	25	[PDE8A - phosphodiesterase 8a, PDE7A - phosphodiesterase 7a, PDE6G - phosphodiesterase 6g, cgmp-specific, rod, gamma, ENPP3 - ectonucleotide pyrophosphatase/phosphodiesterase 3, GDPD5 - glycerophosphodiester phosphodiesterase domain containing 5, CASR - calcium-sensing receptor, ENPP1 - ectonucleotide pyrophosphatase/phosphodiesterase 1, GPLD1 - glycosylphosphatidylinositol specific phospholipase…
GO:0004553	hydrolase activity, hydrolyzing O-glycosyl compounds	2.62e-05	0.011	2.5	12256	69	1560	22	[GLB1L - galactosidase, beta 1-like, NEU1 - sialidase 1 (lysosomal sialidase), MAN2A2 - mannosidase, alpha, class 2a, member 2, GBA - glucosidase, beta, acid, EDEM1 - er degradation enhancer, mannosidase alpha-like 1, CHID1 - chitinase domain containing 1, CTSA - cathepsin a, EDEM3 - er degradation enhancer, mannosidase alpha-like 3, FUCA2 - fucosidase, alpha-l- 2, plasma, MOGS - mannosyl-oligosa…
GO:0004860	protein kinase inhibitor activity	2.75e-05	0.0105	2.44	12256	74	1560	23	[SH3BP5 - sh3-domain binding protein 5 (btk-associated), CAMK2N2 - calcium/calmodulin-dependent protein kinase ii inhibitor 2, WNK1 - wnk lysine deficient protein kinase 1, SOCS2 - suppressor of cytokine signaling 2, RTN4RL1 - reticulon 4 receptor-like 1, CDKN2A - cyclin-dependent kinase inhibitor 2a, FLRT2 - fibronectin leucine rich transmembrane protein 2, SOCS1 - suppressor of cytokine signali…
GO:0043167	ion binding	6.37e-05	0.0223	1.13	12256	4233	1560	607	[SPTAN1 - spectrin, alpha, non-erythrocytic 1, ZFYVE28 - zinc finger, fyve domain containing 28, SVEP1 - sushi, von willebrand factor type a, egf and pentraxin domain containing 1, COX5B - cytochrome c oxidase subunit vb, ABCA1 - atp-binding cassette, sub-family a (abc1), member 1, NR6A1 - nuclear receptor subfamily 6, group a, member 1, CP - ceruloplasmin (ferroxidase), ABL2 - c-abl oncogene 2, …
GO:0019210	kinase inhibitor activity	6.92e-05	0.0224	2.32	12256	78	1560	23	[SH3BP5 - sh3-domain binding protein 5 (btk-associated), CAMK2N2 - calcium/calmodulin-dependent protein kinase ii inhibitor 2, WNK1 - wnk lysine deficient protein kinase 1, SOCS2 - suppressor of cytokine signaling 2, RTN4RL1 - reticulon 4 receptor-like 1, CDKN2A - cyclin-dependent kinase inhibitor 2a, FLRT2 - fibronectin leucine rich transmembrane protein 2, SOCS1 - suppressor of cytokine signali…
GO:0051117	ATPase binding	7.87e-05	0.0236	2.53	12256	59	1560	19	[RALA - v-ral simian leukemia viral oncogene homolog a (ras related), ATP6V0A1 - atpase, h+ transporting, lysosomal v0 subunit a1, ATPIF1 - atpase inhibitory factor 1, ZNHIT6 - zinc finger, hit-type containing 6, RAB3A - rab3a, member ras oncogene family, WFS1 - wolfram syndrome 1 (wolframin), AR - androgen receptor, CHMP4A - charged multivesicular body protein 4a, PIH1D1 - pih1 domain containing…
GO:0016616	oxidoreductase activity, acting on the CH-OH group of donors, NAD or NADP as acceptor	8.63e-05	0.0242	2.34	12256	74	1560	22	[DHRS3 - dehydrogenase/reductase (sdr family) member 3, HSD17B7 - hydroxysteroid (17-beta) dehydrogenase 7, HSD3B7 - hydroxy-delta-5-steroid dehydrogenase, 3 beta- and steroid delta-isomerase 7, HSD17B2 - hydroxysteroid (17-beta) dehydrogenase 2, HPGD - hydroxyprostaglandin dehydrogenase 15-(nad), PTGR1 - prostaglandin reductase 1, MDH1 - malate dehydrogenase 1, nad (soluble), CBR4 - carbonyl red…
GO:0016684	oxidoreductase activity, acting on peroxide as acceptor	0.000106	0.0278	3.09	12256	33	1560	13	[IYD - iodotyrosine deiodinase, PRDX6 - peroxiredoxin 6, GPX3 - glutathione peroxidase 3 (plasma), CAT - catalase, DUOX1 - dual oxidase 1, PRDX4 - peroxiredoxin 4, SESN1 - sestrin 1, PXDNL - peroxidasin homolog (drosophila)-like, PRDX1 - peroxiredoxin 1, GPX4 - glutathione peroxidase 4, MGST1 - microsomal glutathione s-transferase 1, PRDX3 - peroxiredoxin 3, MGST3 - microsomal glutathione s-trans…
GO:0019901	protein kinase binding	0.000127	0.0315	1.48	12256	434	1560	82	[TOB1 - transducer of erbb2, 1, EMP2 - epithelial membrane protein 2, CAMK2N2 - calcium/calmodulin-dependent protein kinase ii inhibitor 2, WNK1 - wnk lysine deficient protein kinase 1, SOCS1 - suppressor of cytokine signaling 1, UTRN - utrophin, SIK1 - salt-inducible kinase 1, SDC4 - syndecan 4, ATP1B1 - atpase, na+/k+ transporting, beta 1 polypeptide, CASR - calcium-sensing receptor, FAF1 - fas…
GO:0004857	enzyme inhibitor activity	0.000147	0.0343	1.65	12256	253	1560	53	[CAMK2N2 - calcium/calmodulin-dependent protein kinase ii inhibitor 2, CSTB - cystatin b (stefin b), PPP1R36 - protein phosphatase 1, regulatory subunit 36, SERPINA3 - serpin peptidase inhibitor, clade a (alpha-1 antiproteinase, antitrypsin), member 3, WNK1 - wnk lysine deficient protein kinase 1, SOCS1 - suppressor of cytokine signaling 1, GCHFR - gtp cyclohydrolase i feedback regulator, SERPINA…
GO:0004601	peroxidase activity	0.000164	0.0363	3.14	12256	30	1560	12	[IYD - iodotyrosine deiodinase, PRDX6 - peroxiredoxin 6, PXDNL - peroxidasin homolog (drosophila)-like, PRDX1 - peroxiredoxin 1, GPX4 - glutathione peroxidase 4, CAT - catalase, GPX3 - glutathione peroxidase 3 (plasma), DUOX1 - dual oxidase 1, MGST1 - microsomal glutathione s-transferase 1, PRDX3 - peroxiredoxin 3, PRDX4 - peroxiredoxin 4, MGST3 - microsomal glutathione s-transferase 3]
GO:0046914	transition metal ion binding	0.000175	0.0367	1.35	12256	731	1560	126	[PAPPA - pregnancy-associated plasma protein a, pappalysin 1, ERAP1 - endoplasmic reticulum aminopeptidase 1, ZEB1 - zinc finger e-box binding homeobox 1, CP - ceruloplasmin (ferroxidase), NR6A1 - nuclear receptor subfamily 6, group a, member 1, ENPEP - glutamyl aminopeptidase (aminopeptidase a), ABL2 - c-abl oncogene 2, non-receptor tyrosine kinase, TRIM26 - tripartite motif containing 26, AOX1 …
GO:0030246	carbohydrate binding	0.000183	0.0366	1.84	12256	154	1560	36	[MAN2A2 - mannosidase, alpha, class 2a, member 2, LAYN - layilin, P4HA3 - prolyl 4-hydroxylase, alpha polypeptide iii, PLA2R1 - phospholipase a2 receptor 1, 180kda, GALNT18 - udp-n-acetyl-alpha-d-galactosamine:polypeptide n-acetylgalactosaminyltransferase 18, LGALS8 - lectin, galactoside-binding, soluble, 8, FUOM - fucose mutarotase, OS9 - osteosarcoma amplified 9, endoplasmic reticulum lectin, E…
GO:0042625	ATPase coupled ion transmembrane transporter activity	0.000195	0.0373	2.52	12256	53	1560	17	[ATP6V0B - atpase, h+ transporting, lysosomal 21kda, v0 subunit b, ATP6V0A1 - atpase, h+ transporting, lysosomal v0 subunit a1, ATP6AP1 - atpase, h+ transporting, lysosomal accessory protein 1, ATP7A - atpase, cu++ transporting, alpha polypeptide, ATP6V0D2 - atpase, h+ transporting, lysosomal 38kda, v0 subunit d2, ABCC2 - atp-binding cassette, sub-family c (cftr/mrp), member 2, ATP6V1A - atpase, …
GO:0050661	NADP binding	0.000213	0.0389	2.92	12256	35	1560	13	[TM7SF2 - transmembrane 7 superfamily member 2, CAT - catalase, DUOX1 - dual oxidase 1, CBR4 - carbonyl reductase 4, POR - p450 (cytochrome) oxidoreductase, IDH1 - isocitrate dehydrogenase 1 (nadp+), soluble, DHCR7 - 7-dehydrocholesterol reductase, CRYZL1 - crystallin, zeta (quinone reductase)-like 1, HMGCR - 3-hydroxy-3-methylglutaryl-coa reductase, H6PD - hexose-6-phosphate dehydrogenase (gluco…
GO:0016798	hydrolase activity, acting on glycosyl bonds	0.000226	0.0396	2.12	12256	89	1560	24	[GLB1L - galactosidase, beta 1-like, NEU1 - sialidase 1 (lysosomal sialidase), MAN2A2 - mannosidase, alpha, class 2a, member 2, GBA - glucosidase, beta, acid, EDEM1 - er degradation enhancer, mannosidase alpha-like 1, CHID1 - chitinase domain containing 1, CTSA - cathepsin a, EDEM3 - er degradation enhancer, mannosidase alpha-like 3, FUCA2 - fucosidase, alpha-l- 2, plasma, MOGS - mannosyl-oligosa…
GO:0004559	alpha-mannosidase activity	0.000236	0.0396	4.58	12256	12	1560	7	[MAN2A2 - mannosidase, alpha, class 2a, member 2, EDEM1 - er degradation enhancer, mannosidase alpha-like 1, MAN1B1 - mannosidase, alpha, class 1b, member 1, EDEM2 - er degradation enhancer, mannosidase alpha-like 2, EDEM3 - er degradation enhancer, mannosidase alpha-like 3, MAN2B2 - mannosidase, alpha, class 2b, member 2, MAN2A1 - mannosidase, alpha, class 2a, member 1]
GO:0015924	mannosyl-oligosaccharide mannosidase activity	0.000251	0.0405	5.24	12256	9	1560	6	[MAN2A2 - mannosidase, alpha, class 2a, member 2, EDEM1 - er degradation enhancer, mannosidase alpha-like 1, EDEM2 - er degradation enhancer, mannosidase alpha-like 2, MAN1B1 - mannosidase, alpha, class 1b, member 1, EDEM3 - er degradation enhancer, mannosidase alpha-like 3, MAN2A1 - mannosidase, alpha, class 2a, member 1]
GO:0046872	metal ion binding	0.000307	0.0478	1.16	12256	2713	1560	399	[SPTAN1 - spectrin, alpha, non-erythrocytic 1, ZFYVE28 - zinc finger, fyve domain containing 28, SVEP1 - sushi, von willebrand factor type a, egf and pentraxin domain containing 1, COX5B - cytochrome c oxidase subunit vb, CP - ceruloplasmin (ferroxidase), NR6A1 - nuclear receptor subfamily 6, group a, member 1, ABL2 - c-abl oncogene 2, non-receptor tyrosine kinase, LMAN2 - lectin, mannose-binding…
GO:0016628	oxidoreductase activity, acting on the CH-CH group of donors, NAD or NADP as acceptor	0.000385	0.0577	3.54	12256	20	1560	9	[DHCR24 - 24-dehydrocholesterol reductase, DHCR7 - 7-dehydrocholesterol reductase, ZADH2 - zinc binding alcohol dehydrogenase domain containing 2, TM7SF2 - transmembrane 7 superfamily member 2, BLVRB - biliverdin reductase b (flavin reductase (nadph)), PTGR1 - prostaglandin reductase 1, FASN - fatty acid synthase, DPYD - dihydropyrimidine dehydrogenase, DHDH - dihydrodiol dehydrogenase (dimeric)]
GO:0044769	ATPase activity, coupled to transmembrane movement of ions, rotational mechanism	0.000385	0.0557	3.54	12256	20	1560	9	[ATP6V1H - atpase, h+ transporting, lysosomal 50/57kda, v1 subunit h, ATP6V0B - atpase, h+ transporting, lysosomal 21kda, v0 subunit b, ATP6V0A1 - atpase, h+ transporting, lysosomal v0 subunit a1, ATP6AP1 - atpase, h+ transporting, lysosomal accessory protein 1, ATP6V0D2 - atpase, h+ transporting, lysosomal 38kda, v0 subunit d2, ATP6V0E1 - atpase, h+ transporting, lysosomal 9kda, v0 subunit e1, A…
GO:0016853	isomerase activity	0.000428	0.0599	1.95	12256	109	1560	27	[PPIC - peptidylprolyl isomerase c (cyclophilin c), LSS - lanosterol synthase (2,3-oxidosqualene-lanosterol cyclase), PPIL1 - peptidylprolyl isomerase (cyclophilin)-like 1, PPIB - peptidylprolyl isomerase b (cyclophilin b), ERO1LB - ero1-like beta (s. cerevisiae), GLCE - glucuronic acid epimerase, PDIA4 - protein disulfide isomerase family a, member 4, PTGDS - prostaglandin d2 synthase 21kda (bra…
GO:0004115	3',5'-cyclic-AMP phosphodiesterase activity	0.000455	0.0616	4.23	12256	13	1560	7	[PDE1A - phosphodiesterase 1a, calmodulin-dependent, PDE8A - phosphodiesterase 8a, PDE7A - phosphodiesterase 7a, PDE10A - phosphodiesterase 10a, PDE4D - phosphodiesterase 4d, camp-specific, PDE3A - phosphodiesterase 3a, cgmp-inhibited, PDE4B - phosphodiesterase 4b, camp-specific]
GO:0015923	mannosidase activity	0.000455	0.0597	4.23	12256	13	1560	7	[MAN2A2 - mannosidase, alpha, class 2a, member 2, EDEM1 - er degradation enhancer, mannosidase alpha-like 1, MAN1B1 - mannosidase, alpha, class 1b, member 1, EDEM2 - er degradation enhancer, mannosidase alpha-like 2, EDEM3 - er degradation enhancer, mannosidase alpha-like 3, MAN2B2 - mannosidase, alpha, class 2b, member 2, MAN2A1 - mannosidase, alpha, class 2a, member 1]
GO:0030234	enzyme regulator activity	0.000469	0.0597	1.33	12256	714	1560	121	[FN1 - fibronectin 1, SERPINA3 - serpin peptidase inhibitor, clade a (alpha-1 antiproteinase, antitrypsin), member 3, GDI1 - gdp dissociation inhibitor 1, ARHGAP10 - rho gtpase activating protein 10, STXBP5 - syntaxin binding protein 5 (tomosyn), SGSM3 - small g protein signaling modulator 3, PLCB1 - phospholipase c, beta 1 (phosphoinositide-specific), GCHFR - gtp cyclohydrolase i feedback regula…
GO:0043169	cation binding	0.000496	0.0613	1.15	12256	2781	1560	406	[SPTAN1 - spectrin, alpha, non-erythrocytic 1, ZFYVE28 - zinc finger, fyve domain containing 28, SVEP1 - sushi, von willebrand factor type a, egf and pentraxin domain containing 1, COX5B - cytochrome c oxidase subunit vb, CP - ceruloplasmin (ferroxidase), NR6A1 - nuclear receptor subfamily 6, group a, member 1, ABL2 - c-abl oncogene 2, non-receptor tyrosine kinase, LMAN2 - lectin, mannose-binding…
GO:0019887	protein kinase regulator activity	0.000542	0.065	1.81	12256	139	1560	32	[CAMK2N2 - calcium/calmodulin-dependent protein kinase ii inhibitor 2, WNK1 - wnk lysine deficient protein kinase 1, SOCS1 - suppressor of cytokine signaling 1, CCNT1 - cyclin t1, MADD - map-kinase activating death domain, FAF1 - fas (tnfrsf6) associated factor 1, DNAJC3 - dnaj (hsp40) homolog, subfamily c, member 3, CIB1 - calcium and integrin binding 1 (calmyrin), EFNA5 - ephrin-a5, CHP1 - calc…
GO:0042626	ATPase activity, coupled to transmembrane movement of substances	0.000558	0.0651	2.12	12256	78	1560	21	[ATP6V0B - atpase, h+ transporting, lysosomal 21kda, v0 subunit b, ATP6V0A1 - atpase, h+ transporting, lysosomal v0 subunit a1, ATP6AP1 - atpase, h+ transporting, lysosomal accessory protein 1, ATP7A - atpase, cu++ transporting, alpha polypeptide, ATP6V0D2 - atpase, h+ transporting, lysosomal 38kda, v0 subunit d2, ABCC2 - atp-binding cassette, sub-family c (cftr/mrp), member 2, ATP6V1A - atpase, …
GO:0042802	identical protein binding	0.000615	0.0698	1.24	12256	1203	1560	190	[SLC27A1 - solute carrier family 27 (fatty acid transporter), member 1, PRDX6 - peroxiredoxin 6, BNIP3 - bcl2/adenovirus e1b 19kda interacting protein 3, BNIP3L - bcl2/adenovirus e1b 19kda interacting protein 3-like, GSTA4 - glutathione s-transferase alpha 4, MAPRE3 - microtubule-associated protein, rp/eb family, member 3, FN1 - fibronectin 1, STARD3 - star-related lipid transfer (start) domain c…
GO:0016655	oxidoreductase activity, acting on NAD(P)H, quinone or similar compound as acceptor	0.000639	0.0706	2.77	12256	34	1560	12	[NDUFAF2 - nadh dehydrogenase (ubiquinone) complex i, assembly factor 2, CRYZL1 - crystallin, zeta (quinone reductase)-like 1, NDUFV2 - nadh dehydrogenase (ubiquinone) flavoprotein 2, 24kda, NDUFB5 - nadh dehydrogenase (ubiquinone) 1 beta subcomplex, 5, 16kda, NDUFB3 - nadh dehydrogenase (ubiquinone) 1 beta subcomplex, 3, 12kda, NQO1 - nad(p)h dehydrogenase, quinone 1, NDUFA2 - nadh dehydrogenase…
GO:0016820	hydrolase activity, acting on acid anhydrides, catalyzing transmembrane movement of substances	0.000671	0.0722	2.09	12256	79	1560	21	[ATP6V0B - atpase, h+ transporting, lysosomal 21kda, v0 subunit b, ATP6V0A1 - atpase, h+ transporting, lysosomal v0 subunit a1, ATP6AP1 - atpase, h+ transporting, lysosomal accessory protein 1, ATP7A - atpase, cu++ transporting, alpha polypeptide, ATP6V0D2 - atpase, h+ transporting, lysosomal 38kda, v0 subunit d2, ABCC2 - atp-binding cassette, sub-family c (cftr/mrp), member 2, ATP6V1A - atpase, …
GO:0004114	3',5'-cyclic-nucleotide phosphodiesterase activity	0.000898	0.0943	3.21	12256	22	1560	9	[PDE1A - phosphodiesterase 1a, calmodulin-dependent, PDE8A - phosphodiesterase 8a, PDE7A - phosphodiesterase 7a, PDE10A - phosphodiesterase 10a, PDE6G - phosphodiesterase 6g, cgmp-specific, rod, gamma, PDE4D - phosphodiesterase 4d, camp-specific, PDE6A - phosphodiesterase 6a, cgmp-specific, rod, alpha, PDE3A - phosphodiesterase 3a, cgmp-inhibited, PDE4B - phosphodiesterase 4b, camp-specific]

## Sheet: Fig2A
GO Term	Description	P-value	FDR q-value	Enrichment	N	B	n	b	Genes
GO:0022402	cell cycle process	3.98e-26	5.72e-22	1.98	12306	781	1756	221	[DSN1 - dsn1, mis12 kinetochore complex component, RFC4 - replication factor c (activator 1) 4, 37kda, RFC5 - replication factor c (activator 1) 5, 36.5kda, RFC2 - replication factor c (activator 1) 2, 40kda, RFC3 - replication factor c (activator 1) 3, 38kda, KIF20B - kinesin family member 20b, SPIRE1 - spire actin nucleation factor 1, BRCA1 - breast cancer 1, early onset, CDT1 - chromatin licen…
GO:0051301	cell division	7.83e-23	5.63e-19	2.57	12306	303	1756	111	[CDC6 - cell division cycle 6, DSN1 - dsn1, mis12 kinetochore complex component, FAM83D - family with sequence similarity 83, member d, CDC25A - cell division cycle 25a, CDC20 - cell division cycle 20, BIRC5 - baculoviral iap repeat containing 5, KIF20B - kinesin family member 20b, SGOL1 - shugoshin-like 1 (s. pombe), CDT1 - chromatin licensing and dna replication factor 1, CD2AP - cd2-associated…
GO:1903047	mitotic cell cycle process	2.06e-21	9.86e-18	2.13	12306	504	1756	153	[CDC6 - cell division cycle 6, DSN1 - dsn1, mis12 kinetochore complex component, CDC25A - cell division cycle 25a, CDC20 - cell division cycle 20, BIRC5 - baculoviral iap repeat containing 5, ORC1 - origin recognition complex, subunit 1, SGOL1 - shugoshin-like 1 (s. pombe), ORC4 - origin recognition complex, subunit 4, BRCA1 - breast cancer 1, early onset, CDT1 - chromatin licensing and dna repli…
GO:0051276	chromosome organization	5.47e-21	1.97e-17	2.46	12306	313	1756	110	[DSN1 - dsn1, mis12 kinetochore complex component, RFC4 - replication factor c (activator 1) 4, 37kda, RFC5 - replication factor c (activator 1) 5, 36.5kda, CDC20 - cell division cycle 20, RFC2 - replication factor c (activator 1) 2, 40kda, BIRC5 - baculoviral iap repeat containing 5, RFC3 - replication factor c (activator 1) 3, 38kda, SGOL1 - shugoshin-like 1 (s. pombe), CDT1 - chromatin licensi…
GO:0007049	cell cycle	4.2e-15	1.21e-11	2.22	12306	303	1756	96	[CDC6 - cell division cycle 6, KLHL42 - kelch-like family member 42, CDC20 - cell division cycle 20, KATNA1 - katanin p60 (atpase containing) subunit a 1, MAP3K8 - mitogen-activated protein kinase kinase kinase 8, ARPP19 - camp-regulated phosphoprotein, 19kda, NUF2 - nuf2, ndc80 kinetochore complex component, CDT1 - chromatin licensing and dna replication factor 1, CD2AP - cd2-associated protein,…
GO:0006260	DNA replication	1.12e-14	2.69e-11	2.92	12306	132	1756	55	[CDC6 - cell division cycle 6, RFC4 - replication factor c (activator 1) 4, 37kda, CDC25A - cell division cycle 25a, RFC5 - replication factor c (activator 1) 5, 36.5kda, RFC2 - replication factor c (activator 1) 2, 40kda, RFC3 - replication factor c (activator 1) 3, 38kda, ORC1 - origin recognition complex, subunit 1, BRCA1 - breast cancer 1, early onset, ORC4 - origin recognition complex, subun…
GO:0006996	organelle organization	1.16e-14	2.38e-11	1.45	12306	1624	1756	337	[BOK - bcl2-related ovarian killer, DSN1 - dsn1, mis12 kinetochore complex component, RFC4 - replication factor c (activator 1) 4, 37kda, RFC5 - replication factor c (activator 1) 5, 36.5kda, RFC2 - replication factor c (activator 1) 2, 40kda, RFC3 - replication factor c (activator 1) 3, 38kda, CEP89 - centrosomal protein 89kda, HPS3 - hermansky-pudlak syndrome 3, WDR19 - wd repeat domain 19, SPI…
GO:0007010	cytoskeleton organization	1.23e-14	2.22e-11	1.84	12306	568	1756	149	[PHLDB2 - pleckstrin homology-like domain, family b, member 2, CDC20 - cell division cycle 20, BIRC5 - baculoviral iap repeat containing 5, S1PR2 - sphingosine-1-phosphate receptor 2, F11R - f11 receptor, SPIRE1 - spire actin nucleation factor 1, ABLIM1 - actin binding lim protein 1, SPDL1 - spindle apparatus coiled-coil protein 1, ANLN - anillin, actin binding protein, SAPCD2 - suppressor apc do…
GO:0007059	chromosome segregation	4.52e-14	7.23e-11	3.6	12306	74	1756	38	[CEP85 - centrosomal protein 85kda, DSN1 - dsn1, mis12 kinetochore complex component, CDK5RAP2 - cdk5 regulatory subunit associated protein 2, CENPC - centromere protein c, NEK2 - nima-related kinase 2, CENPE - centromere protein e, 312kda, NUF2 - nuf2, ndc80 kinetochore complex component, SGOL1 - shugoshin-like 1 (s. pombe), CENPF - centromere protein f, 350/400kda, CDT1 - chromatin licensing an…
GO:0007062	sister chromatid cohesion	6.66e-14	9.58e-11	3.19	12306	99	1756	45	[DSN1 - dsn1, mis12 kinetochore complex component, CENPA - centromere protein a, CDC20 - cell division cycle 20, ERCC6L - excision repair cross-complementing rodent repair deficiency, complementation group 6-like, BIRC5 - baculoviral iap repeat containing 5, CENPC - centromere protein c, CENPE - centromere protein e, 312kda, CENPM - centromere protein m, RAD51C - rad51 paralog c, NUF2 - nuf2, ndc…
GO:0051726	regulation of cell cycle	2.97e-11	3.88e-08	1.57	12306	844	1756	189	[CDC6 - cell division cycle 6, CEP85 - centrosomal protein 85kda, FAM83D - family with sequence similarity 83, member d, KANK2 - kn motif and ankyrin repeat domains 2, CDC25A - cell division cycle 25a, CDC20 - cell division cycle 20, BIRC5 - baculoviral iap repeat containing 5, KIF20B - kinesin family member 20b, MAP3K8 - mitogen-activated protein kinase kinase kinase 8, WDR76 - wd repeat domain …
GO:0006259	DNA metabolic process	3.66e-11	4.38e-08	1.71	12306	565	1756	138	[CDC6 - cell division cycle 6, CDC25A - cell division cycle 25a, RFC4 - replication factor c (activator 1) 4, 37kda, RFC5 - replication factor c (activator 1) 5, 36.5kda, RFC2 - replication factor c (activator 1) 2, 40kda, RFC3 - replication factor c (activator 1) 3, 38kda, EXO5 - exonuclease 5, ORC1 - origin recognition complex, subunit 1, ORC4 - origin recognition complex, subunit 4, BRCA1 - br…
GO:0000278	mitotic cell cycle	4.04e-11	4.47e-08	3.19	12306	77	1756	35	[CDC6 - cell division cycle 6, NEK2 - nima-related kinase 2, CENPC - centromere protein c, CENPE - centromere protein e, 312kda, ARPP19 - camp-regulated phosphoprotein, 19kda, NUF2 - nuf2, ndc80 kinetochore complex component, CENPF - centromere protein f, 350/400kda, CDT1 - chromatin licensing and dna replication factor 1, KIF15 - kinesin family member 15, SMC3 - structural maintenance of chromos…
GO:0007017	microtubule-based process	4.27e-11	4.39e-08	1.85	12306	409	1756	108	[PHLDB2 - pleckstrin homology-like domain, family b, member 2, CDC20 - cell division cycle 20, BIRC5 - baculoviral iap repeat containing 5, KIFAP3 - kinesin-associated protein 3, KIF20B - kinesin family member 20b, WDR19 - wd repeat domain 19, SPIRE1 - spire actin nucleation factor 1, BRCA1 - breast cancer 1, early onset, SPDL1 - spindle apparatus coiled-coil protein 1, IFT46 - intraflagellar tra…
GO:0120031	plasma membrane bounded cell projection assembly	4.27e-11	4.1e-08	2.21	12306	219	1756	69	[EMP1 - epithelial membrane protein 1, MAK - male germ cell-associated kinase, SH3BP1 - sh3-domain binding protein 1, S1PR2 - sphingosine-1-phosphate receptor 2, POC1B - poc1 centriolar protein b, CEP89 - centrosomal protein 89kda, TMEM138 - transmembrane protein 138, WDR19 - wd repeat domain 19, ABLIM1 - actin binding lim protein 1, GORAB - golgin, rab6-interacting, CD2AP - cd2-associated protei…
GO:0030031	cell projection assembly	4.69e-11	4.21e-08	2.19	12306	224	1756	70	[EMP1 - epithelial membrane protein 1, MAK - male germ cell-associated kinase, SH3BP1 - sh3-domain binding protein 1, S1PR2 - sphingosine-1-phosphate receptor 2, POC1B - poc1 centriolar protein b, CEP89 - centrosomal protein 89kda, TMEM138 - transmembrane protein 138, WDR19 - wd repeat domain 19, ABLIM1 - actin binding lim protein 1, GORAB - golgin, rab6-interacting, CD2AP - cd2-associated protei…
GO:0044770	cell cycle phase transition	5.7e-11	4.82e-08	2.26	12306	202	1756	65	[CDC6 - cell division cycle 6, CDC25A - cell division cycle 25a, CDK5RAP2 - cdk5 regulatory subunit associated protein 2, CCNB2 - cyclin b2, ORC1 - origin recognition complex, subunit 1, ARPP19 - camp-regulated phosphoprotein, 19kda, CDT1 - chromatin licensing and dna replication factor 1, ORC4 - origin recognition complex, subunit 4, HAUS3 - haus augmin-like complex, subunit 3, CDK14 - cyclin-de…
GO:0044772	mitotic cell cycle phase transition	9.31e-11	7.44e-08	2.26	12306	195	1756	63	[CDC6 - cell division cycle 6, CDC25A - cell division cycle 25a, CDK5RAP2 - cdk5 regulatory subunit associated protein 2, CCNB2 - cyclin b2, ORC1 - origin recognition complex, subunit 1, ARPP19 - camp-regulated phosphoprotein, 19kda, CDT1 - chromatin licensing and dna replication factor 1, ORC4 - origin recognition complex, subunit 4, HAUS3 - haus augmin-like complex, subunit 3, CDK14 - cyclin-de…
GO:0000226	microtubule cytoskeleton organization	1.32e-10	9.99e-08	2.16	12306	224	1756	69	[PHLDB2 - pleckstrin homology-like domain, family b, member 2, CDK5RAP2 - cdk5 regulatory subunit associated protein 2, CDC20 - cell division cycle 20, KATNA1 - katanin p60 (atpase containing) subunit a 1, BIRC5 - baculoviral iap repeat containing 5, SPIRE1 - spire actin nucleation factor 1, HAUS3 - haus augmin-like complex, subunit 3, SPDL1 - spindle apparatus coiled-coil protein 1, SAPCD2 - sup…
GO:0048522	positive regulation of cellular process	1.56e-10	1.12e-07	1.22	12306	3653	1756	635	[TRIB3 - tribbles homolog 3 (drosophila), PCGF5 - polycomb group ring finger 5, EXOSC9 - exosome component 9, ARHGEF39 - rho guanine nucleotide exchange factor (gef) 39, PRRX1 - paired related homeobox 1, KIF20B - kinesin family member 20b, MAP3K8 - mitogen-activated protein kinase kinase kinase 8, TNFRSF12A - tumor necrosis factor receptor superfamily, member 12a, LRRC16A - leucine rich repeat c…
GO:0016043	cellular component organization	2.1e-10	1.44e-07	1.22	12306	3652	1756	634	[PCGF5 - polycomb group ring finger 5, DSN1 - dsn1, mis12 kinetochore complex component, SH3BP1 - sh3-domain binding protein 1, KIF20B - kinesin family member 20b, CEP89 - centrosomal protein 89kda, HPS3 - hermansky-pudlak syndrome 3, WDR19 - wd repeat domain 19, ABLIM1 - actin binding lim protein 1, CD2AP - cd2-associated protein, LRRC16A - leucine rich repeat containing 16a, CHAF1B - chromatin …
GO:0031055	chromatin remodeling at centromere	2.78e-10	1.81e-07	5.34	12306	21	1756	16	[CENPA - centromere protein a, CENPC - centromere protein c, CENPT - centromere protein t, CENPM - centromere protein m, OIP5 - opa interacting protein 5, CENPK - centromere protein k, CASC5 - cancer susceptibility candidate 5, CENPV - centromere protein v, HELLS - helicase, lymphoid-specific, CENPQ - centromere protein q, CENPH - centromere protein h, CENPN - centromere protein n, CENPI - centro…
GO:1902850	microtubule cytoskeleton organization involved in mitosis	3.63e-10	2.27e-07	3.16	12306	71	1756	32	[CENPA - centromere protein a, CDK5RAP2 - cdk5 regulatory subunit associated protein 2, CDC20 - cell division cycle 20, BIRC5 - baculoviral iap repeat containing 5, NEK2 - nima-related kinase 2, CENPE - centromere protein e, 312kda, TUBGCP5 - tubulin, gamma complex associated protein 5, SPDL1 - spindle apparatus coiled-coil protein 1, SAPCD2 - suppressor apc domain containing 2, MAP9 - microtubul…
GO:0010564	regulation of cell cycle process	4.16e-10	2.49e-07	1.71	12306	503	1756	123	[CDC6 - cell division cycle 6, CEP85 - centrosomal protein 85kda, KANK2 - kn motif and ankyrin repeat domains 2, FAM83D - family with sequence similarity 83, member d, CDC25A - cell division cycle 25a, CDC20 - cell division cycle 20, KIF20B - kinesin family member 20b, BRCA1 - breast cancer 1, early onset, CDT1 - chromatin licensing and dna replication factor 1, CDC25C - cell division cycle 25c, …
GO:0006270	DNA replication initiation	4.46e-10	2.57e-07	4.38	12306	32	1756	20	[CDC6 - cell division cycle 6, MCM7 - minichromosome maintenance complex component 7, ORC1 - origin recognition complex, subunit 1, ORC4 - origin recognition complex, subunit 4, ORC5 - origin recognition complex, subunit 5, PRIM2 - primase, dna, polypeptide 2 (58kda), GINS4 - gins complex subunit 4 (sld5 homolog), MCM8 - minichromosome maintenance complex component 8, MCM4 - minichromosome mainte…
GO:0071840	cellular component organization or biogenesis	5.39e-10	2.98e-07	1.21	12306	3690	1756	637	[PCGF5 - polycomb group ring finger 5, DSN1 - dsn1, mis12 kinetochore complex component, SH3BP1 - sh3-domain binding protein 1, KIF20B - kinesin family member 20b, CEP89 - centrosomal protein 89kda, HPS3 - hermansky-pudlak syndrome 3, WDR19 - wd repeat domain 19, ABLIM1 - actin binding lim protein 1, CD2AP - cd2-associated protein, LRRC16A - leucine rich repeat containing 16a, CHAF1B - chromatin …
GO:0051493	regulation of cytoskeleton organization	7.95e-10	4.23e-07	1.84	12306	361	1756	95	[FHOD3 - formin homology 2 domain containing 3, CEP85 - centrosomal protein 85kda, PHLDB2 - pleckstrin homology-like domain, family b, member 2, SH3BP1 - sh3-domain binding protein 1, CDK5RAP2 - cdk5 regulatory subunit associated protein 2, EML2 - echinoderm microtubule associated protein like 2, CAPN2 - calpain 2, (m/ii) large subunit, F11R - f11 receptor, CAPG - capping protein (actin filament)…
GO:0006974	cellular response to DNA damage stimulus	2.45e-09	1.26e-06	1.66	12306	533	1756	126	[BOK - bcl2-related ovarian killer, RFC4 - replication factor c (activator 1) 4, 37kda, RFC5 - replication factor c (activator 1) 5, 36.5kda, RFC2 - replication factor c (activator 1) 2, 40kda, RFC3 - replication factor c (activator 1) 3, 38kda, EXO5 - exonuclease 5, WDR76 - wd repeat domain 76, BRCA1 - breast cancer 1, early onset, CDC25C - cell division cycle 25c, LIG1 - ligase i, dna, atp-depe…
GO:0006334	nucleosome assembly	2.54e-09	1.26e-06	3.58	12306	47	1756	24	[CENPA - centromere protein a, ANP32E - acidic (leucine-rich) nuclear phosphoprotein 32 family, member e, CENPC - centromere protein c, CENPT - centromere protein t, OIP5 - opa interacting protein 5, CENPM - centromere protein m, SOX9 - sry (sex determining region y)-box 9, HMGB2 - high mobility group box 2, ANP32B - acidic (leucine-rich) nuclear phosphoprotein 32 family, member b, CENPK - centro…
GO:0048518	positive regulation of biological process	2.88e-09	1.38e-06	1.19	12306	4038	1756	684	[TRIB3 - tribbles homolog 3 (drosophila), PCGF5 - polycomb group ring finger 5, EXOSC9 - exosome component 9, PRRX1 - paired related homeobox 1, ARHGEF39 - rho guanine nucleotide exchange factor (gef) 39, KIF20B - kinesin family member 20b, MAP3K8 - mitogen-activated protein kinase kinase kinase 8, TNFRSF12A - tumor necrosis factor receptor superfamily, member 12a, LRRC16A - leucine rich repeat c…
GO:0000075	cell cycle checkpoint	4.66e-09	2.16e-06	2.64	12306	101	1756	38	[CDC6 - cell division cycle 6, CENPF - centromere protein f, 350/400kda, XPC - xeroderma pigmentosum, complementation group c, BRCA1 - breast cancer 1, early onset, CDT1 - chromatin licensing and dna replication factor 1, SPDL1 - spindle apparatus coiled-coil protein 1, DTL - denticleless e3 ubiquitin protein ligase homolog (drosophila), CCNG2 - cyclin g2, TP53BP1 - tumor protein p53 binding prot…
GO:0006333	chromatin assembly or disassembly	7.45e-09	3.35e-06	3.43	12306	49	1756	24	[CENPA - centromere protein a, SUV39H2 - suppressor of variegation 3-9 homolog 2 (drosophila), CENPC - centromere protein c, OIP5 - opa interacting protein 5, CENPM - centromere protein m, CENPT - centromere protein t, CENPK - centromere protein k, IPO4 - importin 4, CHAF1A - chromatin assembly factor 1, subunit a (p150), CASC5 - cancer susceptibility candidate 5, CENPV - centromere protein v, HE…
GO:0034080	CENP-A containing nucleosome assembly	7.95e-09	3.46e-06	5.16	12306	19	1756	14	[CENPA - centromere protein a, CENPC - centromere protein c, CENPT - centromere protein t, CENPM - centromere protein m, OIP5 - opa interacting protein 5, CENPK - centromere protein k, CASC5 - cancer susceptibility candidate 5, CENPQ - centromere protein q, CENPH - centromere protein h, CENPN - centromere protein n, CENPI - centromere protein i, MLF1IP - mlf1 interacting protein, CENPO - centrome…
GO:0006281	DNA repair	1.09e-08	4.61e-06	1.8	12306	342	1756	88	[C17orf104 - chromosome 17 open reading frame 104, RFC4 - replication factor c (activator 1) 4, 37kda, RFC5 - replication factor c (activator 1) 5, 36.5kda, RFC2 - replication factor c (activator 1) 2, 40kda, RFC3 - replication factor c (activator 1) 3, 38kda, EXO5 - exonuclease 5, XPC - xeroderma pigmentosum, complementation group c, BRCA1 - breast cancer 1, early onset, DTL - denticleless e3 ub…
GO:0120036	plasma membrane bounded cell projection organization	1.12e-08	4.62e-06	1.71	12306	421	1756	103	[EMP1 - epithelial membrane protein 1, SH3BP1 - sh3-domain binding protein 1, S1PR2 - sphingosine-1-phosphate receptor 2, CEP89 - centrosomal protein 89kda, CDH1 - cadherin 1, type 1, e-cadherin (epithelial), WDR19 - wd repeat domain 19, ABLIM1 - actin binding lim protein 1, CD2AP - cd2-associated protein, LRRC16A - leucine rich repeat containing 16a, GORAB - golgin, rab6-interacting, IFT46 - int…
GO:0007088	regulation of mitotic nuclear division	1.31e-08	5.22e-06	2.46	12306	117	1756	41	[CDC6 - cell division cycle 6, CEP85 - centrosomal protein 85kda, CEP97 - centrosomal protein 97kda, NEK2 - nima-related kinase 2, CENPE - centromere protein e, 312kda, KIF20B - kinesin family member 20b, CENPF - centromere protein f, 350/400kda, CDT1 - chromatin licensing and dna replication factor 1, ANLN - anillin, actin binding protein, CDC25C - cell division cycle 25c, SMC3 - structural main…
GO:0007346	regulation of mitotic cell cycle	1.43e-08	5.58e-06	1.65	12306	493	1756	116	[CDC6 - cell division cycle 6, CEP85 - centrosomal protein 85kda, KANK2 - kn motif and ankyrin repeat domains 2, BIRC5 - baculoviral iap repeat containing 5, KIF20B - kinesin family member 20b, MAP3K8 - mitogen-activated protein kinase kinase kinase 8, BRCA1 - breast cancer 1, early onset, CDT1 - chromatin licensing and dna replication factor 1, SIN3A - sin3 transcription regulator family member …
GO:0043486	histone exchange	1.75e-08	6.64e-06	4.25	12306	28	1756	17	[CENPA - centromere protein a, ANP32E - acidic (leucine-rich) nuclear phosphoprotein 32 family, member e, CENPC - centromere protein c, CENPM - centromere protein m, OIP5 - opa interacting protein 5, CENPT - centromere protein t, ANP32B - acidic (leucine-rich) nuclear phosphoprotein 32 family, member b, CENPK - centromere protein k, CASC5 - cancer susceptibility candidate 5, CENPQ - centromere pr…
GO:0098813	nuclear chromosome segregation	1.75e-08	6.47e-06	4.25	12306	28	1756	17	[DSN1 - dsn1, mis12 kinetochore complex component, PLK1 - polo-like kinase 1, NEK2 - nima-related kinase 2, MAD2L1 - mad2 mitotic arrest deficient-like 1 (yeast), SGOL1 - shugoshin-like 1 (s. pombe), KLHL22 - kelch-like family member 22, NDC80 - ndc80 kinetochore complex component, NUSAP1 - nucleolar and spindle associated protein 1, TTK - ttk protein kinase, KIFC1 - kinesin family member c1, NCA…
GO:0033043	regulation of organelle organization	2.68e-08	9.63e-06	1.44	12306	938	1756	193	[BOK - bcl2-related ovarian killer, SH3BP1 - sh3-domain binding protein 1, KIF20B - kinesin family member 20b, SPIRE1 - spire actin nucleation factor 1, BRCA1 - breast cancer 1, early onset, CDT1 - chromatin licensing and dna replication factor 1, NAF1 - nuclear assembly factor 1 ribonucleoprotein, CD2AP - cd2-associated protein, LRRC16A - leucine rich repeat containing 16a, LIF - leukemia inhibi…
GO:0006271	DNA strand elongation involved in DNA replication	2.87e-08	1.01e-05	5.93	12306	13	1756	11	[PARP1 - poly (adp-ribose) polymerase 1, PCNA - proliferating cell nuclear antigen, RFC4 - replication factor c (activator 1) 4, 37kda, POLE - polymerase (dna directed), epsilon, catalytic subunit, POLD2 - polymerase (dna directed), delta 2, accessory subunit, RFC3 - replication factor c (activator 1) 3, 38kda, POLA1 - polymerase (dna directed), alpha 1, catalytic subunit, GINS3 - gins complex su…
GO:0051783	regulation of nuclear division	4.68e-08	1.6e-05	2.28	12306	135	1756	44	[CDC6 - cell division cycle 6, CEP85 - centrosomal protein 85kda, CEP97 - centrosomal protein 97kda, CDC20 - cell division cycle 20, NEK2 - nima-related kinase 2, CENPE - centromere protein e, 312kda, KIF20B - kinesin family member 20b, CENPF - centromere protein f, 350/400kda, CDT1 - chromatin licensing and dna replication factor 1, ANLN - anillin, actin binding protein, CDC25C - cell division c…
GO:0032201	telomere maintenance via semi-conservative replication	5.99e-08	2e-05	4.67	12306	21	1756	14	[PCNA - proliferating cell nuclear antigen, RFC4 - replication factor c (activator 1) 4, 37kda, RFC5 - replication factor c (activator 1) 5, 36.5kda, RFC2 - replication factor c (activator 1) 2, 40kda, RFC3 - replication factor c (activator 1) 3, 38kda, PRIM2 - primase, dna, polypeptide 2 (58kda), POLE2 - polymerase (dna directed), epsilon 2, accessory subunit, POLD4 - polymerase (dna-directed), …
GO:0034728	nucleosome organization	7.14e-08	2.34e-05	2.91	12306	65	1756	27	[CENPA - centromere protein a, ANP32E - acidic (leucine-rich) nuclear phosphoprotein 32 family, member e, CENPC - centromere protein c, CENPM - centromere protein m, HMGB2 - high mobility group box 2, ANP32B - acidic (leucine-rich) nuclear phosphoprotein 32 family, member b, CENPK - centromere protein k, CHAF1B - chromatin assembly factor 1, subunit b (p60), CENPQ - centromere protein q, CENPH - …
GO:0030030	cell projection organization	7.45e-08	2.38e-05	1.56	12306	574	1756	128	[EMP1 - epithelial membrane protein 1, SH3BP1 - sh3-domain binding protein 1, S1PR2 - sphingosine-1-phosphate receptor 2, ITGA8 - integrin, alpha 8, KIF20B - kinesin family member 20b, CEP89 - centrosomal protein 89kda, CDH1 - cadherin 1, type 1, e-cadherin (epithelial), WDR19 - wd repeat domain 19, ABLIM1 - actin binding lim protein 1, CD2AP - cd2-associated protein, LRRC16A - leucine rich repea…
GO:0034724	DNA replication-independent nucleosome organization	7.56e-08	2.37e-05	4.15	12306	27	1756	16	[CENPA - centromere protein a, CENPC - centromere protein c, CENPM - centromere protein m, OIP5 - opa interacting protein 5, CENPT - centromere protein t, CENPK - centromere protein k, IPO4 - importin 4, CASC5 - cancer susceptibility candidate 5, CENPQ - centromere protein q, CENPH - centromere protein h, CENPN - centromere protein n, CENPI - centromere protein i, MLF1IP - mlf1 interacting protei…
GO:0006336	DNA replication-independent nucleosome assembly	7.56e-08	2.31e-05	4.15	12306	27	1756	16	[CENPA - centromere protein a, CENPC - centromere protein c, CENPM - centromere protein m, OIP5 - opa interacting protein 5, CENPT - centromere protein t, CENPK - centromere protein k, IPO4 - importin 4, CASC5 - cancer susceptibility candidate 5, CENPQ - centromere protein q, CENPH - centromere protein h, CENPN - centromere protein n, CENPI - centromere protein i, MLF1IP - mlf1 interacting protei…
GO:0051128	regulation of cellular component organization	9.61e-08	2.88e-05	1.29	12306	1795	1756	330	[BOK - bcl2-related ovarian killer, EXOSC9 - exosome component 9, SH3BP1 - sh3-domain binding protein 1, PRRX1 - paired related homeobox 1, KIF20B - kinesin family member 20b, TNFRSF12A - tumor necrosis factor receptor superfamily, member 12a, SPIRE1 - spire actin nucleation factor 1, CDT1 - chromatin licensing and dna replication factor 1, BRCA1 - breast cancer 1, early onset, NAF1 - nuclear ass…
GO:1901987	regulation of cell cycle phase transition	1.44e-07	4.21e-05	1.76	12306	318	1756	80	[CDC6 - cell division cycle 6, ARID3A - at rich interactive domain 3a (bright-like), FAM83D - family with sequence similarity 83, member d, CDC25A - cell division cycle 25a, KANK2 - kn motif and ankyrin repeat domains 2, CDK5RAP2 - cdk5 regulatory subunit associated protein 2, PKIA - protein kinase (camp-dependent, catalytic) inhibitor alpha, XPC - xeroderma pigmentosum, complementation group c, …
GO:0070925	organelle assembly	1.81e-07	5.21e-05	1.7	12306	362	1756	88	[FHOD3 - formin homology 2 domain containing 3, MAK - male germ cell-associated kinase, CDK5RAP2 - cdk5 regulatory subunit associated protein 2, CDC20 - cell division cycle 20, BIRC5 - baculoviral iap repeat containing 5, POC1B - poc1 centriolar protein b, CEP89 - centrosomal protein 89kda, TMEM138 - transmembrane protein 138, NKX2-5 - nk2 homeobox 5, WDR19 - wd repeat domain 19, HAUS3 - haus aug…
GO:0065004	protein-DNA complex assembly	2.04e-07	5.76e-05	2.43	12306	101	1756	35	[CENPA - centromere protein a, ANP32E - acidic (leucine-rich) nuclear phosphoprotein 32 family, member e, CENPC - centromere protein c, CENPM - centromere protein m, RAD51C - rad51 paralog c, XPC - xeroderma pigmentosum, complementation group c, CDT1 - chromatin licensing and dna replication factor 1, ANP32B - acidic (leucine-rich) nuclear phosphoprotein 32 family, member b, HMGB2 - high mobility…
GO:0006928	movement of cell or subcellular component	2.04e-07	5.65e-05	1.39	12306	1011	1756	201	[FAM83D - family with sequence similarity 83, member d, SH3BP1 - sh3-domain binding protein 1, KIFAP3 - kinesin-associated protein 3, KIF20B - kinesin family member 20b, WDR19 - wd repeat domain 19, LRRC16A - leucine rich repeat containing 16a, IFT46 - intraflagellar transport 46 homolog (chlamydomonas), IER2 - immediate early response 2, SPOCK1 - sparc/osteonectin, cwcv and kazal-like domains pr…
GO:0000070	mitotic sister chromatid segregation	2.12e-07	5.75e-05	4.95	12306	17	1756	12	[KIFC1 - kinesin family member c1, DSN1 - dsn1, mis12 kinetochore complex component, NSL1 - nsl1, mis12 kinetochore complex component, PLK1 - polo-like kinase 1, NEK2 - nima-related kinase 2, MAD2L1 - mad2 mitotic arrest deficient-like 1 (yeast), KNSTRN - kinetochore-localized astrin/spag5 binding protein, KIF18B - kinesin family member 18b, KLHL22 - kelch-like family member 22, ESPL1 - extra spi…
GO:0007163	establishment or maintenance of cell polarity	2.44e-07	6.49e-05	2.38	12306	106	1756	36	[PKD1 - polycystic kidney disease 1 (autosomal dominant), SH3BP1 - sh3-domain binding protein 1, CRB1 - crumbs homolog 1 (drosophila), DLG3 - discs, large homolog 3 (drosophila), KIF26B - kinesin family member 26b, SLC9A1 - solute carrier family 9, subfamily a (nhe1, cation proton antiporter 1), member 1, FSCN1 - fascin homolog 1, actin-bundling protein (strongylocentrotus purpuratus), MYH9 - myo…
GO:0000819	sister chromatid segregation	2.83e-07	7.4e-05	4.56	12306	20	1756	13	[DSN1 - dsn1, mis12 kinetochore complex component, PLK1 - polo-like kinase 1, NEK2 - nima-related kinase 2, MAD2L1 - mad2 mitotic arrest deficient-like 1 (yeast), KLHL22 - kelch-like family member 22, NDC80 - ndc80 kinetochore complex component, NUSAP1 - nucleolar and spindle associated protein 1, KIFC1 - kinesin family member c1, NSL1 - nsl1, mis12 kinetochore complex component, TOP2A - topoisom…
GO:1901990	regulation of mitotic cell cycle phase transition	2.9e-07	7.45e-05	1.76	12306	302	1756	76	[CDC6 - cell division cycle 6, ARID3A - at rich interactive domain 3a (bright-like), KANK2 - kn motif and ankyrin repeat domains 2, CDK5RAP2 - cdk5 regulatory subunit associated protein 2, PKIA - protein kinase (camp-dependent, catalytic) inhibitor alpha, XPC - xeroderma pigmentosum, complementation group c, HAUS3 - haus augmin-like complex, subunit 3, CDT1 - chromatin licensing and dna replicati…
GO:0007052	mitotic spindle organization	3.46e-07	8.72e-05	3.08	12306	50	1756	22	[PCNT - pericentrin, CDC20 - cell division cycle 20, STMN1 - stathmin 1, BIRC5 - baculoviral iap repeat containing 5, SPC25 - spc25, ndc80 kinetochore complex component, NEK2 - nima-related kinase 2, RCC1 - regulator of chromosome condensation 1, CENPE - centromere protein e, 312kda, TUBGCP5 - tubulin, gamma complex associated protein 5, NDC80 - ndc80 kinetochore complex component, TTK - ttk prot…
GO:0007051	spindle organization	3.7e-07	9.17e-05	2.53	12306	86	1756	31	[CDC20 - cell division cycle 20, NEK2 - nima-related kinase 2, BIRC5 - baculoviral iap repeat containing 5, CENPE - centromere protein e, 312kda, TUBGCP5 - tubulin, gamma complex associated protein 5, HAUS3 - haus augmin-like complex, subunit 3, MYH9 - myosin, heavy chain 9, non-muscle, MAP9 - microtubule-associated protein 9, MYBL2 - v-myb avian myeloblastosis viral oncogene homolog-like 2, ARHG…
GO:0009653	anatomical structure morphogenesis	3.89e-07	9.47e-05	1.37	12306	1074	1756	210	[PRRX1 - paired related homeobox 1, KIF20B - kinesin family member 20b, WDR19 - wd repeat domain 19, ABLIM1 - actin binding lim protein 1, GORAB - golgin, rab6-interacting, LIF - leukemia inhibitory factor, LIG1 - ligase i, dna, atp-dependent, MKS1 - meckel syndrome, type 1, HES1 - hairy and enhancer of split 1, (drosophila), PLXNB1 - plexin b1, NRP2 - neuropilin 2, LZTR1 - leucine-zipper-like tr…
GO:0044843	cell cycle G1/S phase transition	3.92e-07	9.41e-05	2.56	12306	82	1756	30	[CDC6 - cell division cycle 6, CDC25A - cell division cycle 25a, MCM7 - minichromosome maintenance complex component 7, ORC1 - origin recognition complex, subunit 1, ORC4 - origin recognition complex, subunit 4, CDT1 - chromatin licensing and dna replication factor 1, CAMK2G - calcium/calmodulin-dependent protein kinase ii gamma, ORC5 - origin recognition complex, subunit 5, PRIM2 - primase, dna,…
GO:0000082	G1/S transition of mitotic cell cycle	3.92e-07	9.25e-05	2.56	12306	82	1756	30	[CDC6 - cell division cycle 6, CDC25A - cell division cycle 25a, MCM7 - minichromosome maintenance complex component 7, ORC1 - origin recognition complex, subunit 1, ORC4 - origin recognition complex, subunit 4, CDT1 - chromatin licensing and dna replication factor 1, CAMK2G - calcium/calmodulin-dependent protein kinase ii gamma, ORC5 - origin recognition complex, subunit 5, PRIM2 - primase, dna,…
GO:0051173	positive regulation of nitrogen compound metabolic process	4.15e-07	9.64e-05	1.24	12306	2217	1756	392	[TRIB3 - tribbles homolog 3 (drosophila), PCGF5 - polycomb group ring finger 5, EXOSC9 - exosome component 9, PRRX1 - paired related homeobox 1, MAP3K8 - mitogen-activated protein kinase kinase kinase 8, PATZ1 - poz (btb) and at hook containing zinc finger 1, AKAP12 - a kinase (prka) anchor protein 12, LIF - leukemia inhibitory factor, IER2 - immediate early response 2, MLLT11 - myeloid/lymphoid …
GO:0031570	DNA integrity checkpoint	4.37e-07	9.97e-05	2.76	12306	66	1756	26	[CDC6 - cell division cycle 6, XPC - xeroderma pigmentosum, complementation group c, CDT1 - chromatin licensing and dna replication factor 1, BRCA1 - breast cancer 1, early onset, DTL - denticleless e3 ubiquitin protein ligase homolog (drosophila), TP53BP1 - tumor protein p53 binding protein 1, TP53 - tumor protein p53, RHNO1 - rad9-hus1-rad1 interacting nuclear orphan 1, TOP2A - topoisomerase (d…
GO:0048729	tissue morphogenesis	4.89e-07	0.00011	1.74	12306	311	1756	77	[NKX2-5 - nk2 homeobox 5, MKS1 - meckel syndrome, type 1, HES1 - hairy and enhancer of split 1, (drosophila), FRZB - frizzled-related protein, WNT11 - wingless-type mmtv integration site family, member 11, ZFPM2 - zinc finger protein, fog family member 2, CTNNB1 - catenin (cadherin-associated protein), beta 1, 88kda, ENG - endoglin, VDR - vitamin d (1,25- dihydroxyvitamin d3) receptor, VEGFA - va…
GO:0060271	cilium assembly	5.24e-07	0.000116	2.08	12306	155	1756	46	[IQCB1 - iq motif containing b1, MAK - male germ cell-associated kinase, RSPH9 - radial spoke head 9 homolog (chlamydomonas), POC1B - poc1 centriolar protein b, CEP89 - centrosomal protein 89kda, TMEM138 - transmembrane protein 138, WDR19 - wd repeat domain 19, ABLIM1 - actin binding lim protein 1, NEK1 - nima-related kinase 1, GORAB - golgin, rab6-interacting, IFT57 - intraflagellar transport 57…
GO:0050793	regulation of developmental process	5.83e-07	0.000127	1.27	12306	1814	1756	328	[TRIB3 - tribbles homolog 3 (drosophila), PRRX1 - paired related homeobox 1, KIF20B - kinesin family member 20b, TNFRSF12A - tumor necrosis factor receptor superfamily, member 12a, BRCA1 - breast cancer 1, early onset, LRRC16A - leucine rich repeat containing 16a, GORAB - golgin, rab6-interacting, LIF - leukemia inhibitory factor, SPOCK1 - sparc/osteonectin, cwcv and kazal-like domains proteoglyc…
GO:0072164	mesonephric tubule development	6.48e-07	0.000139	3.41	12306	37	1756	18	[FGFR2 - fibroblast growth factor receptor 2, PKD1 - polycystic kidney disease 1 (autosomal dominant), PKD2 - polycystic kidney disease 2 (autosomal dominant), OSR1 - odd-skipped related 1 (drosophila), FOXC2 - forkhead box c2 (mfh-1, mesenchyme forkhead 1), TGFB1 - transforming growth factor, beta 1, SMAD1 - smad family member 1, SMAD2 - smad family member 2, SPRY1 - sprouty homolog 1, antagonis…
GO:0044782	cilium organization	6.71e-07	0.000142	2.05	12306	161	1756	47	[IQCB1 - iq motif containing b1, MAK - male germ cell-associated kinase, RSPH9 - radial spoke head 9 homolog (chlamydomonas), POC1B - poc1 centriolar protein b, CEP89 - centrosomal protein 89kda, TMEM138 - transmembrane protein 138, WDR19 - wd repeat domain 19, ABLIM1 - actin binding lim protein 1, NEK1 - nima-related kinase 1, GORAB - golgin, rab6-interacting, IFT57 - intraflagellar transport 57…
GO:0010604	positive regulation of macromolecule metabolic process	8.07e-07	0.000168	1.23	12306	2269	1756	398	[TRIB3 - tribbles homolog 3 (drosophila), PCGF5 - polycomb group ring finger 5, EXOSC9 - exosome component 9, PRRX1 - paired related homeobox 1, MAP3K8 - mitogen-activated protein kinase kinase kinase 8, PATZ1 - poz (btb) and at hook containing zinc finger 1, LIF - leukemia inhibitory factor, IER2 - immediate early response 2, MLLT11 - myeloid/lymphoid or mixed-lineage leukemia (trithorax homolog…
GO:0051983	regulation of chromosome segregation	8.42e-07	0.000173	2.63	12306	72	1756	27	[CDC6 - cell division cycle 6, NEK2 - nima-related kinase 2, CENPE - centromere protein e, 312kda, CENPF - centromere protein f, 350/400kda, CDT1 - chromatin licensing and dna replication factor 1, RACGAP1 - rac gtpase activating protein 1, KNSTRN - kinetochore-localized astrin/spag5 binding protein, MKI67 - antigen identified by monoclonal antibody ki-67, FEN1 - flap structure-specific endonucle…
GO:0032502	developmental process	9.29e-07	0.000188	1.17	12306	3611	1756	601	[SH3BP1 - sh3-domain binding protein 1, PRRX1 - paired related homeobox 1, KIF20B - kinesin family member 20b, TNFRSF12A - tumor necrosis factor receptor superfamily, member 12a, WDR19 - wd repeat domain 19, ABLIM1 - actin binding lim protein 1, PATZ1 - poz (btb) and at hook containing zinc finger 1, LIF - leukemia inhibitory factor, IER2 - immediate early response 2, SPOCK1 - sparc/osteonectin, …
GO:0051383	kinetochore organization	1.01e-06	0.000201	5.73	12306	11	1756	9	[CENPA - centromere protein a, CENPH - centromere protein h, SMC2 - structural maintenance of chromosomes 2, CENPC - centromere protein c, CENPE - centromere protein e, 312kda, CENPT - centromere protein t, CENPF - centromere protein f, 350/400kda, CDT1 - chromatin licensing and dna replication factor 1, NDC80 - ndc80 kinetochore complex component]
GO:0022616	DNA strand elongation	1.06e-06	0.000209	4.82	12306	16	1756	11	[PARP1 - poly (adp-ribose) polymerase 1, PCNA - proliferating cell nuclear antigen, RFC4 - replication factor c (activator 1) 4, 37kda, POLE - polymerase (dna directed), epsilon, catalytic subunit, POLD2 - polymerase (dna directed), delta 2, accessory subunit, RFC3 - replication factor c (activator 1) 3, 38kda, POLA1 - polymerase (dna directed), alpha 1, catalytic subunit, GINS3 - gins complex su…
GO:0072163	mesonephric epithelium development	1.07e-06	0.000207	3.32	12306	38	1756	18	[PKD1 - polycystic kidney disease 1 (autosomal dominant), FGFR2 - fibroblast growth factor receptor 2, PKD2 - polycystic kidney disease 2 (autosomal dominant), OSR1 - odd-skipped related 1 (drosophila), FOXC2 - forkhead box c2 (mfh-1, mesenchyme forkhead 1), TGFB1 - transforming growth factor, beta 1, SMAD1 - smad family member 1, SMAD2 - smad family member 2, SPRY1 - sprouty homolog 1, antagonis…
GO:0071824	protein-DNA complex subunit organization	1.08e-06	0.000208	2.2	12306	121	1756	38	[CENPA - centromere protein a, ANP32E - acidic (leucine-rich) nuclear phosphoprotein 32 family, member e, CENPC - centromere protein c, CENPM - centromere protein m, RAD51C - rad51 paralog c, XPC - xeroderma pigmentosum, complementation group c, CDT1 - chromatin licensing and dna replication factor 1, ANP32B - acidic (leucine-rich) nuclear phosphoprotein 32 family, member b, HMGB2 - high mobility…
GO:0070507	regulation of microtubule cytoskeleton organization	1.08e-06	0.000205	2.2	12306	121	1756	38	[PKD1 - polycystic kidney disease 1 (autosomal dominant), CEP85 - centrosomal protein 85kda, CEP97 - centrosomal protein 97kda, PHLDB2 - pleckstrin homology-like domain, family b, member 2, CDK5RAP2 - cdk5 regulatory subunit associated protein 2, NEK2 - nima-related kinase 2, EML2 - echinoderm microtubule associated protein like 2, CCNF - cyclin f, KIF18A - kinesin family member 18a, BRCA1 - brea…
GO:0045216	cell-cell junction organization	1.18e-06	0.00022	2.1	12306	140	1756	42	[CADM1 - cell adhesion molecule 1, ACTN1 - actinin, alpha 1, ACTN4 - actinin, alpha 4, F11R - f11 receptor, CDH1 - cadherin 1, type 1, e-cadherin (epithelial), KIFC3 - kinesin family member c3, PVRL3 - poliovirus receptor-related 3, CDH3 - cadherin 3, type 1, p-cadherin (placental), FSCN1 - fascin homolog 1, actin-bundling protein (strongylocentrotus purpuratus), CDH2 - cadherin 2, type 1, n-cadh…
GO:0048598	embryonic morphogenesis	1.58e-06	0.000292	1.67	12306	336	1756	80	[PRRX1 - paired related homeobox 1, ITGA8 - integrin, alpha 8, NKX2-5 - nk2 homeobox 5, WDR19 - wd repeat domain 19, MKS1 - meckel syndrome, type 1, HES1 - hairy and enhancer of split 1, (drosophila), PBX2 - pre-b-cell leukemia homeobox 2, FRZB - frizzled-related protein, CDON - cell adhesion associated, oncogene regulated, WNT11 - wingless-type mmtv integration site family, member 11, INSIG2 - i…
GO:0045935	positive regulation of nucleobase-containing compound metabolic process	1.71e-06	0.000312	1.3	12306	1361	1756	253	[PCGF5 - polycomb group ring finger 5, RFC4 - replication factor c (activator 1) 4, 37kda, RFC5 - replication factor c (activator 1) 5, 36.5kda, EXOSC9 - exosome component 9, RFC2 - replication factor c (activator 1) 2, 40kda, RFC3 - replication factor c (activator 1) 3, 38kda, PRRX1 - paired related homeobox 1, RFXAP - regulatory factor x-associated protein, BRCA1 - breast cancer 1, early onset,…
GO:0006338	chromatin remodeling	1.82e-06	0.000327	2.27	12306	105	1756	34	[CENPA - centromere protein a, ANP32E - acidic (leucine-rich) nuclear phosphoprotein 32 family, member e, SUV39H2 - suppressor of variegation 3-9 homolog 2 (drosophila), CENPC - centromere protein c, CENPM - centromere protein m, TADA2A - transcriptional adaptor 2a, ANP32B - acidic (leucine-rich) nuclear phosphoprotein 32 family, member b, CENPK - centromere protein k, CENPV - centromere protein …
GO:0031325	positive regulation of cellular metabolic process	1.97e-06	0.000349	1.22	12306	2294	1756	399	[TRIB3 - tribbles homolog 3 (drosophila), PCGF5 - polycomb group ring finger 5, EXOSC9 - exosome component 9, PRRX1 - paired related homeobox 1, MAP3K8 - mitogen-activated protein kinase kinase kinase 8, PATZ1 - poz (btb) and at hook containing zinc finger 1, LIF - leukemia inhibitory factor, AKAP12 - a kinase (prka) anchor protein 12, IER2 - immediate early response 2, MLLT11 - myeloid/lymphoid …
GO:0060429	epithelium development	2.28e-06	0.000399	2.12	12306	129	1756	39	[PKD1 - polycystic kidney disease 1 (autosomal dominant), FGFR2 - fibroblast growth factor receptor 2, PKD2 - polycystic kidney disease 2 (autosomal dominant), OSR1 - odd-skipped related 1 (drosophila), NKX2-5 - nk2 homeobox 5, SLIT2 - slit homolog 2 (drosophila), SEMA3C - sema domain, immunoglobulin domain (ig), short basic domain, secreted, (semaphorin) 3c, FRZB - frizzled-related protein, AHI1…
GO:0071897	DNA biosynthetic process	2.58e-06	0.000447	2.34	12306	93	1756	31	[RFC4 - replication factor c (activator 1) 4, 37kda, RFC5 - replication factor c (activator 1) 5, 36.5kda, BARD1 - brca1 associated ring domain 1, RFC2 - replication factor c (activator 1) 2, 40kda, RFC3 - replication factor c (activator 1) 3, 38kda, RAD51C - rad51 paralog c, CENPF - centromere protein f, 350/400kda, BRCA1 - breast cancer 1, early onset, DTL - denticleless e3 ubiquitin protein li…
GO:0008283	cell proliferation	2.96e-06	0.000507	1.51	12306	520	1756	112	[EMP1 - epithelial membrane protein 1, BOK - bcl2-related ovarian killer, FAM83D - family with sequence similarity 83, member d, CDC25A - cell division cycle 25a, TCF19 - transcription factor 19, CDC25C - cell division cycle 25c, TRAIP - traf interacting protein, RACGAP1 - rac gtpase activating protein 1, MKI67 - antigen identified by monoclonal antibody ki-67, ZFP36L1 - zfp36 ring finger protein…
GO:0043044	ATP-dependent chromatin remodeling	3.07e-06	0.00052	3.03	12306	44	1756	19	[CENPA - centromere protein a, ANP32E - acidic (leucine-rich) nuclear phosphoprotein 32 family, member e, CENPC - centromere protein c, CENPT - centromere protein t, CENPM - centromere protein m, OIP5 - opa interacting protein 5, ANP32B - acidic (leucine-rich) nuclear phosphoprotein 32 family, member b, CENPK - centromere protein k, CASC5 - cancer susceptibility candidate 5, CENPQ - centromere pr…
GO:0033554	cellular response to stress	3.09e-06	0.000517	1.32	12306	1166	1756	220	[BOK - bcl2-related ovarian killer, TRIB3 - tribbles homolog 3 (drosophila), RFC4 - replication factor c (activator 1) 4, 37kda, RFC5 - replication factor c (activator 1) 5, 36.5kda, GFPT1 - glutamine--fructose-6-phosphate transaminase 1, RFC2 - replication factor c (activator 1) 2, 40kda, RFC3 - replication factor c (activator 1) 3, 38kda, MAP3K8 - mitogen-activated protein kinase kinase kinase …
GO:0030029	actin filament-based process	3.24e-06	0.000535	1.73	12306	272	1756	67	[FHOD3 - formin homology 2 domain containing 3, S1PR2 - sphingosine-1-phosphate receptor 2, F11R - f11 receptor, SLC9A1 - solute carrier family 9, subfamily a (nhe1, cation proton antiporter 1), member 1, NKX2-5 - nk2 homeobox 5, SPIRE1 - spire actin nucleation factor 1, PFN2 - profilin 2, CAMK2D - calcium/calmodulin-dependent protein kinase ii delta, IQSEC2 - iq motif and sec7 domain 2, DIAPH3 -…
GO:0071103	DNA conformation change	3.78e-06	0.000619	2.27	12306	99	1756	32	[MCM7 - minichromosome maintenance complex component 7, RAD54L - rad54-like (s. cerevisiae), XPC - xeroderma pigmentosum, complementation group c, HMGB3 - high mobility group box 3, NCAPD2 - non-smc condensin i complex, subunit d2, HMGB2 - high mobility group box 2, TP53 - tumor protein p53, TOP3A - topoisomerase (dna) iii alpha, NCAPH - non-smc condensin i complex, subunit h, SMC2 - structural m…
GO:0045786	negative regulation of cell cycle	3.84e-06	0.00062	1.58	12306	404	1756	91	[CDC6 - cell division cycle 6, C17orf104 - chromosome 17 open reading frame 104, ARID3A - at rich interactive domain 3a (bright-like), KANK2 - kn motif and ankyrin repeat domains 2, TIMP2 - timp metallopeptidase inhibitor 2, CDK5RAP2 - cdk5 regulatory subunit associated protein 2, TRIM35 - tripartite motif containing 35, KIF20B - kinesin family member 20b, XPC - xeroderma pigmentosum, complementa…
GO:0002009	morphogenesis of an epithelium	3.88e-06	0.000621	1.76	12306	247	1756	62	[NKX2-5 - nk2 homeobox 5, MKS1 - meckel syndrome, type 1, HES1 - hairy and enhancer of split 1, (drosophila), FRZB - frizzled-related protein, WNT11 - wingless-type mmtv integration site family, member 11, CTNNB1 - catenin (cadherin-associated protein), beta 1, 88kda, ENG - endoglin, VDR - vitamin d (1,25- dihydroxyvitamin d3) receptor, VEGFA - vascular endothelial growth factor a, FOXC2 - forkhe…
GO:0035295	tube development	4.13e-06	0.000653	1.98	12306	156	1756	44	[PKD1 - polycystic kidney disease 1 (autosomal dominant), FGFR2 - fibroblast growth factor receptor 2, PKD2 - polycystic kidney disease 2 (autosomal dominant), OSR1 - odd-skipped related 1 (drosophila), AKR1B1 - aldo-keto reductase family 1, member b1 (aldose reductase), KIF18A - kinesin family member 18a, NKX2-5 - nk2 homeobox 5, SLIT2 - slit homolog 2 (drosophila), MKS1 - meckel syndrome, type …
GO:0042127	regulation of cell proliferation	4.27e-06	0.000668	1.32	12306	1165	1756	219	[BOK - bcl2-related ovarian killer, PRRX1 - paired related homeobox 1, KIFAP3 - kinesin-associated protein 3, KIF20B - kinesin family member 20b, BRCA1 - breast cancer 1, early onset, LIF - leukemia inhibitory factor, LIFR - leukemia inhibitory factor receptor alpha, TICAM1 - toll-like receptor adaptor molecule 1, HES1 - hairy and enhancer of split 1, (drosophila), PLXNB1 - plexin b1, NRP2 - neur…
GO:0061640	cytoskeleton-dependent cytokinesis	4.74e-06	0.000732	3.3	12306	34	1756	16	[CENPA - centromere protein a, PLK1 - polo-like kinase 1, STMN1 - stathmin 1, SPIRE1 - spire actin nucleation factor 1, MYH10 - myosin, heavy chain 10, non-muscle, CEP55 - centrosomal protein 55kda, ANLN - anillin, actin binding protein, NUSAP1 - nucleolar and spindle associated protein 1, KIF20A - kinesin family member 20a, SNX18 - sorting nexin 18, RACGAP1 - rac gtpase activating protein 1, KIF…
GO:2000026	regulation of multicellular organismal development	5.2e-06	0.000796	1.28	12306	1424	1756	260	[PRRX1 - paired related homeobox 1, KIF20B - kinesin family member 20b, TNFRSF12A - tumor necrosis factor receptor superfamily, member 12a, BRCA1 - breast cancer 1, early onset, GORAB - golgin, rab6-interacting, LIF - leukemia inhibitory factor, SPOCK1 - sparc/osteonectin, cwcv and kazal-like domains proteoglycan (testican) 1, MKS1 - meckel syndrome, type 1, RACGAP1 - rac gtpase activating protei…
GO:0048513	animal organ development	5.37e-06	0.000813	1.35	12306	966	1756	186	[BOK - bcl2-related ovarian killer, PRRX1 - paired related homeobox 1, ITGA8 - integrin, alpha 8, CDH1 - cadherin 1, type 1, e-cadherin (epithelial), WDR19 - wd repeat domain 19, TCF12 - transcription factor 12, PATZ1 - poz (btb) and at hook containing zinc finger 1, TTC7A - tetratricopeptide repeat domain 7a, MKS1 - meckel syndrome, type 1, HES1 - hairy and enhancer of split 1, (drosophila), INH…
GO:0006297	nucleotide-excision repair, DNA gap filling	5.85e-06	0.000877	4.28	12306	18	1756	11	[PCNA - proliferating cell nuclear antigen, RFC4 - replication factor c (activator 1) 4, 37kda, POLE - polymerase (dna directed), epsilon, catalytic subunit, POLD4 - polymerase (dna-directed), delta 4, accessory subunit, RFC5 - replication factor c (activator 1) 5, 36.5kda, POLD2 - polymerase (dna directed), delta 2, accessory subunit, RFC2 - replication factor c (activator 1) 2, 40kda, RFC3 - re…
GO:0034330	cell junction organization	5.94e-06	0.000881	1.95	12306	158	1756	44	[CADM1 - cell adhesion molecule 1, ACTN1 - actinin, alpha 1, SH3BP1 - sh3-domain binding protein 1, ACTN4 - actinin, alpha 4, F11R - f11 receptor, CDH1 - cadherin 1, type 1, e-cadherin (epithelial), KIFC3 - kinesin family member c3, CDH3 - cadherin 3, type 1, p-cadherin (placental), PVRL3 - poliovirus receptor-related 3, FSCN1 - fascin homolog 1, actin-bundling protein (strongylocentrotus purpura…
GO:0048523	negative regulation of cellular process	6.74e-06	0.000989	1.16	12306	3239	1756	538	[TRIB3 - tribbles homolog 3 (drosophila), SH3BP1 - sh3-domain binding protein 1, PRRX1 - paired related homeobox 1, KIF20B - kinesin family member 20b, CD2AP - cd2-associated protein, LRRC16A - leucine rich repeat containing 16a, PATZ1 - poz (btb) and at hook containing zinc finger 1, LIF - leukemia inhibitory factor, SPOCK1 - sparc/osteonectin, cwcv and kazal-like domains proteoglycan (testican)…
GO:0000077	DNA damage checkpoint	6.94e-06	0.00101	2.66	12306	58	1756	22	[CHEK1 - checkpoint kinase 1, PLK1 - polo-like kinase 1, PEA15 - phosphoprotein enriched in astrocytes 15, XPC - xeroderma pigmentosum, complementation group c, BRCA1 - breast cancer 1, early onset, BLM - bloom syndrome, recq helicase-like, DTL - denticleless e3 ubiquitin protein ligase homolog (drosophila), E2F1 - e2f transcription factor 1, NEK11 - nima-related kinase 11, TP53BP1 - tumor protei…
GO:0009893	positive regulation of metabolic process	7.97e-06	0.00115	1.2	12306	2449	1756	418	[TRIB3 - tribbles homolog 3 (drosophila), PCGF5 - polycomb group ring finger 5, EXOSC9 - exosome component 9, PRRX1 - paired related homeobox 1, MAP3K8 - mitogen-activated protein kinase kinase kinase 8, PATZ1 - poz (btb) and at hook containing zinc finger 1, LIF - leukemia inhibitory factor, AKAP12 - a kinase (prka) anchor protein 12, IER2 - immediate early response 2, MLLT11 - myeloid/lymphoid …
GO:1900264	positive regulation of DNA-directed DNA polymerase activity	8.38e-06	0.00119	7.01	12306	6	1756	6	[RFC4 - replication factor c (activator 1) 4, 37kda, RFC5 - replication factor c (activator 1) 5, 36.5kda, RFC2 - replication factor c (activator 1) 2, 40kda, RFC3 - replication factor c (activator 1) 3, 38kda, CHTF18 - ctf18, chromosome transmission fidelity factor 18 homolog (s. cerevisiae), DSCC1 - dna replication and sister chromatid cohesion 1]
GO:1900262	regulation of DNA-directed DNA polymerase activity	8.38e-06	0.00118	7.01	12306	6	1756	6	[RFC4 - replication factor c (activator 1) 4, 37kda, RFC5 - replication factor c (activator 1) 5, 36.5kda, RFC2 - replication factor c (activator 1) 2, 40kda, RFC3 - replication factor c (activator 1) 3, 38kda, DSCC1 - dna replication and sister chromatid cohesion 1, CHTF18 - ctf18, chromosome transmission fidelity factor 18 homolog (s. cerevisiae)]
GO:0019219	regulation of nucleobase-containing compound metabolic process	8.52e-06	0.00119	1.18	12306	2826	1756	475	[TRIB3 - tribbles homolog 3 (drosophila), PCGF5 - polycomb group ring finger 5, EXOSC9 - exosome component 9, PRRX1 - paired related homeobox 1, PATZ1 - poz (btb) and at hook containing zinc finger 1, LIF - leukemia inhibitory factor, AKAP12 - a kinase (prka) anchor protein 12, IER2 - immediate early response 2, LIG3 - ligase iii, dna, atp-dependent, CHAF1B - chromatin assembly factor 1, subunit …
GO:0022414	reproductive process	8.91e-06	0.00123	1.35	12306	937	1756	180	[BOK - bcl2-related ovarian killer, DSN1 - dsn1, mis12 kinetochore complex component, HVCN1 - hydrogen voltage-gated channel 1, GPR64 - g protein-coupled receptor 64, SGOL1 - shugoshin-like 1 (s. pombe), SPIRE1 - spire actin nucleation factor 1, WDR19 - wd repeat domain 19, PVRL3 - poliovirus receptor-related 3, RFX2 - regulatory factor x, 2 (influences hla class ii expression), CDC25C - cell div…
GO:0043536	positive regulation of blood vessel endothelial cell migration	9.42e-06	0.00129	3.64	12306	25	1756	13	[ANGPT1 - angiopoietin 1, VEGFA - vascular endothelial growth factor a, FOXC2 - forkhead box c2 (mfh-1, mesenchyme forkhead 1), VEGFC - vascular endothelial growth factor c, TGFB1 - transforming growth factor, beta 1, SRPX2 - sushi-repeat containing protein, x-linked 2, HSPB1 - heat shock 27kda protein 1, FGF2 - fibroblast growth factor 2 (basic), THBS1 - thrombospondin 1, PTGS2 - prostaglandin-e…
GO:0000731	DNA synthesis involved in DNA repair	9.58e-06	0.0013	2.61	12306	59	1756	22	[PCNA - proliferating cell nuclear antigen, RFC4 - replication factor c (activator 1) 4, 37kda, RFC5 - replication factor c (activator 1) 5, 36.5kda, BARD1 - brca1 associated ring domain 1, RFC2 - replication factor c (activator 1) 2, 40kda, RFC3 - replication factor c (activator 1) 3, 38kda, REV1 - rev1, polymerase (dna directed), RAD51C - rad51 paralog c, BRCA1 - breast cancer 1, early onset, B…
GO:0006302	double-strand break repair	9.6e-06	0.00129	2.1	12306	117	1756	35	[C17orf104 - chromosome 17 open reading frame 104, BARD1 - brca1 associated ring domain 1, RAD51C - rad51 paralog c, RAD54L - rad54-like (s. cerevisiae), SFR1 - swi5-dependent recombination repair 1, BRCA1 - breast cancer 1, early onset, RAD52 - rad52 homolog (s. cerevisiae), TP53BP1 - tumor protein p53 binding protein 1, LIG3 - ligase iii, dna, atp-dependent, FEN1 - flap structure-specific endon…
GO:0032886	regulation of microtubule-based process	1.15e-05	0.00153	1.97	12306	142	1756	40	[PKD1 - polycystic kidney disease 1 (autosomal dominant), CEP85 - centrosomal protein 85kda, CEP97 - centrosomal protein 97kda, PHLDB2 - pleckstrin homology-like domain, family b, member 2, KLHL42 - kelch-like family member 42, CDK5RAP2 - cdk5 regulatory subunit associated protein 2, NEK2 - nima-related kinase 2, EML2 - echinoderm microtubule associated protein like 2, CCNF - cyclin f, KIF18A - k…
GO:0048856	anatomical structure development	1.18e-05	0.00156	1.19	12306	2478	1756	421	[PRRX1 - paired related homeobox 1, WDR19 - wd repeat domain 19, PATZ1 - poz (btb) and at hook containing zinc finger 1, LIF - leukemia inhibitory factor, SPOCK1 - sparc/osteonectin, cwcv and kazal-like domains proteoglycan (testican) 1, PODXL - podocalyxin-like, GDA - guanine deaminase, PANK2 - pantothenate kinase 2, SEMA6D - sema domain, transmembrane domain (tm), and cytoplasmic domain, (semap…
GO:0050794	regulation of cellular process	1.22e-05	0.00159	1.08	12306	7113	1756	1096	[EXOSC9 - exosome component 9, GFPT1 - glutamine--fructose-6-phosphate transaminase 1, PRRX1 - paired related homeobox 1, WDR76 - wd repeat domain 76, LRRC16A - leucine rich repeat containing 16a, PODXL - podocalyxin-like, CHAF1B - chromatin assembly factor 1, subunit b (p60), PLXNB1 - plexin b1, LZTR1 - leucine-zipper-like transcription regulator 1, MLLT11 - myeloid/lymphoid or mixed-lineage leu…
protein, MEOX2 - mesenchyme homeobox 2, IL17D - interleukin 17d, ANGEL2 - angel homolog 2 (drosophila), S100A13 - s100 calcium binding protein a13, S100A4 - s100 calcium binding protein a4, SYDE2 - synapse defective 1, rho gtpase, homolog 2 (c. elegans), DGKQ - diacylglycerol kinase, theta 110kda, DAPK1 - death-associated protein kinase 1, DAP - death-associated protein, OSMR - oncostatin m recep…
GO:0000281	mitotic cytokinesis	1.3e-05	0.00168	3.38	12306	29	1756	14	[CENPA - centromere protein a, PLK1 - polo-like kinase 1, STMN1 - stathmin 1, MYH10 - myosin, heavy chain 10, non-muscle, ANLN - anillin, actin binding protein, CEP55 - centrosomal protein 55kda, NUSAP1 - nucleolar and spindle associated protein 1, SNX18 - sorting nexin 18, KIF20A - kinesin family member 20a, RACGAP1 - rac gtpase activating protein 1, KIF23 - kinesin family member 23, RASA1 - ras…
GO:0045944	positive regulation of transcription from RNA polymerase II promoter	1.44e-05	0.00185	1.35	12306	865	1756	167	[PCGF5 - polycomb group ring finger 5, EXOSC9 - exosome component 9, PRRX1 - paired related homeobox 1, ITGA8 - integrin, alpha 8, KLF12 - kruppel-like factor 12, BRCA1 - breast cancer 1, early onset, TCF12 - transcription factor 12, RFX2 - regulatory factor x, 2 (influences hla class ii expression), LIF - leukemia inhibitory factor, PATZ1 - poz (btb) and at hook containing zinc finger 1, SIN3A -…
GO:0045787	positive regulation of cell cycle	1.48e-05	0.00188	1.67	12306	273	1756	65	[CDC6 - cell division cycle 6, C17orf104 - chromosome 17 open reading frame 104, ARID3A - at rich interactive domain 3a (bright-like), FAM83D - family with sequence similarity 83, member d, CDC25A - cell division cycle 25a, KIF20B - kinesin family member 20b, CDT1 - chromatin licensing and dna replication factor 1, BRCA1 - breast cancer 1, early onset, CDC25C - cell division cycle 25c, SIN3A - si…
GO:0036297	interstrand cross-link repair	1.59e-05	0.00201	3.19	12306	33	1756	15	[UBE2T - ubiquitin-conjugating enzyme e2t (putative), EXO5 - exonuclease 5, FANCA - fanconi anemia, complementation group a, USP1 - ubiquitin specific peptidase 1, FANCE - fanconi anemia, complementation group e, RAD51 - rad51 recombinase, C17orf70 - chromosome 17 open reading frame 70, FANCD2 - fanconi anemia, complementation group d2, FANCG - fanconi anemia, complementation group g, ERCC1 - exc…
GO:0051653	spindle localization	1.59e-05	0.00199	3.19	12306	33	1756	15	[CENPA - centromere protein a, CDK5RAP2 - cdk5 regulatory subunit associated protein 2, SPRY1 - sprouty homolog 1, antagonist of fgf signaling (drosophila), SPIRE1 - spire actin nucleation factor 1, SPRY2 - sprouty homolog 2 (drosophila), SPDL1 - spindle apparatus coiled-coil protein 1, NDC80 - ndc80 kinetochore complex component, NUSAP1 - nucleolar and spindle associated protein 1, MYH9 - myosin…
GO:0030278	regulation of ossification	1.63e-05	0.00202	1.97	12306	139	1756	39	[FGFR2 - fibroblast growth factor receptor 2, OSR1 - odd-skipped related 1 (drosophila), ACVR2A - activin a receptor, type iia, SLC8A1 - solute carrier family 8 (sodium/calcium exchanger), member 1, PTGER4 - prostaglandin e receptor 4 (subtype ep4), GLI3 - gli family zinc finger 3, RASSF2 - ras association (ralgds/af-6) domain family member 2, PTK2B - protein tyrosine kinase 2 beta, CLIC1 - chlor…
GO:0001932	regulation of protein phosphorylation	1.65e-05	0.00203	1.32	12306	1014	1756	191	[CDC6 - cell division cycle 6, TRIB3 - tribbles homolog 3 (drosophila), CEP85 - centrosomal protein 85kda, FAM83D - family with sequence similarity 83, member d, CDC25A - cell division cycle 25a, S1PR2 - sphingosine-1-phosphate receptor 2, MAP3K8 - mitogen-activated protein kinase kinase kinase 8, FLT4 - fms-related tyrosine kinase 4, CDH2 - cadherin 2, type 1, n-cadherin (neuronal), LIF - leukem…
GO:1903046	meiotic cell cycle process	1.69e-05	0.00206	2.07	12306	115	1756	34	[DSN1 - dsn1, mis12 kinetochore complex component, C17orf104 - chromosome 17 open reading frame 104, CENPC - centromere protein c, RAD51C - rad51 paralog c, KIF18A - kinesin family member 18a, SPIRE1 - spire actin nucleation factor 1, SGOL1 - shugoshin-like 1 (s. pombe), NCAPD2 - non-smc condensin i complex, subunit d2, FANCA - fanconi anemia, complementation group a, MYH9 - myosin, heavy chain 9…
GO:0090068	positive regulation of cell cycle process	1.72e-05	0.00208	1.79	12306	200	1756	51	[CDC6 - cell division cycle 6, ARID3A - at rich interactive domain 3a (bright-like), FAM83D - family with sequence similarity 83, member d, CDC25A - cell division cycle 25a, KIF20B - kinesin family member 20b, BRCA1 - breast cancer 1, early onset, CDT1 - chromatin licensing and dna replication factor 1, CDC25C - cell division cycle 25c, SIN3A - sin3 transcription regulator family member a, DTL - …
GO:0010965	regulation of mitotic sister chromatid separation	1.81e-05	0.00217	3.03	12306	37	1756	16	[CDC6 - cell division cycle 6, BUB1 - bub1 mitotic checkpoint serine/threonine kinase, PLK1 - polo-like kinase 1, BUB1B - bub1 mitotic checkpoint serine/threonine kinase b, MAD2L1 - mad2 mitotic arrest deficient-like 1 (yeast), CENPE - centromere protein e, 312kda, UBE2C - ubiquitin-conjugating enzyme e2c, CENPF - centromere protein f, 350/400kda, CDT1 - chromatin licensing and dna replication fa…
GO:0030334	regulation of cell migration	1.85e-05	0.0022	1.45	12306	552	1756	114	[GPR124 - g protein-coupled receptor 124, PHLDB2 - pleckstrin homology-like domain, family b, member 2, SH3BP1 - sh3-domain binding protein 1, ARHGEF39 - rho guanine nucleotide exchange factor (gef) 39, KIF20B - kinesin family member 20b, FLT4 - fms-related tyrosine kinase 4, LRRC16A - leucine rich repeat containing 16a, PODXL - podocalyxin-like, NRP2 - neuropilin 2, PTPN23 - protein tyrosine pho…
GO:0051302	regulation of cell division	1.86e-05	0.00219	2.12	12306	106	1756	32	[FGFR2 - fibroblast growth factor receptor 2, PDGFA - platelet-derived growth factor alpha polypeptide, CDC6 - cell division cycle 6, KIF14 - kinesin family member 14, KIF20B - kinesin family member 20b, FGF5 - fibroblast growth factor 5, MAP9 - microtubule-associated protein 9, RACGAP1 - rac gtpase activating protein 1, CENPV - centromere protein v, E2F8 - e2f transcription factor 8, FGF2 - fibr…
GO:0000086	G2/M transition of mitotic cell cycle	1.86e-05	0.00217	2.12	12306	106	1756	32	[CDC25A - cell division cycle 25a, CDK5RAP2 - cdk5 regulatory subunit associated protein 2, NEK2 - nima-related kinase 2, CCNB2 - cyclin b2, ARPP19 - camp-regulated phosphoprotein, 19kda, HAUS3 - haus augmin-like complex, subunit 3, TPD52L1 - tumor protein d52-like 1, CDK14 - cyclin-dependent kinase 14, CDC25C - cell division cycle 25c, CCNY - cyclin y, NES - nestin, FOXM1 - forkhead box m1, CIT …
GO:0030036	actin cytoskeleton organization	1.86e-05	0.00216	1.72	12306	232	1756	57	[FHOD3 - formin homology 2 domain containing 3, S1PR2 - sphingosine-1-phosphate receptor 2, F11R - f11 receptor, NKX2-5 - nk2 homeobox 5, SPIRE1 - spire actin nucleation factor 1, PFN2 - profilin 2, IQSEC2 - iq motif and sec7 domain 2, DIAPH3 - diaphanous-related formin 3, RACGAP1 - rac gtpase activating protein 1, PTK2B - protein tyrosine kinase 2 beta, ABLIM3 - actin binding lim protein family,…
GO:0016477	cell migration	1.94e-05	0.00223	1.44	12306	576	1756	118	[GPR124 - g protein-coupled receptor 124, FAM83D - family with sequence similarity 83, member d, SH3BP1 - sh3-domain binding protein 1, F11R - f11 receptor, LRRC16A - leucine rich repeat containing 16a, CDH2 - cadherin 2, type 1, n-cadherin (neuronal), ANLN - anillin, actin binding protein, SPOCK1 - sparc/osteonectin, cwcv and kazal-like domains proteoglycan (testican) 1, PODXL - podocalyxin-like…
GO:0032956	regulation of actin cytoskeleton organization	2.13e-05	0.00243	1.71	12306	233	1756	57	[FHOD3 - formin homology 2 domain containing 3, PHLDB2 - pleckstrin homology-like domain, family b, member 2, SH3BP1 - sh3-domain binding protein 1, CAPG - capping protein (actin filament), gelsolin-like, F11R - f11 receptor, SPIRE1 - spire actin nucleation factor 1, SLC9A1 - solute carrier family 9, subfamily a (nhe1, cation proton antiporter 1), member 1, PFN2 - profilin 2, LRRC16A - leucine ri…
GO:0000723	telomere maintenance	2.2e-05	0.00249	2.44	12306	66	1756	23	[PCNA - proliferating cell nuclear antigen, RIF1 - rap1 interacting factor homolog (yeast), RFC4 - replication factor c (activator 1) 4, 37kda, RFC5 - replication factor c (activator 1) 5, 36.5kda, RFC2 - replication factor c (activator 1) 2, 40kda, RFC3 - replication factor c (activator 1) 3, 38kda, RAD51C - rad51 paralog c, BLM - bloom syndrome, recq helicase-like, ACD - adrenocortical dysplasi…
GO:0010595	positive regulation of endothelial cell migration	2.39e-05	0.00268	2.49	12306	62	1756	22	[ANGPT1 - angiopoietin 1, GPR124 - g protein-coupled receptor 124, VEGFA - vascular endothelial growth factor a, FOXC2 - forkhead box c2 (mfh-1, mesenchyme forkhead 1), VEGFC - vascular endothelial growth factor c, TGFB1 - transforming growth factor, beta 1, SRPX2 - sushi-repeat containing protein, x-linked 2, FLT4 - fms-related tyrosine kinase 4, HSPB1 - heat shock 27kda protein 1, ANXA3 - annex…
GO:0001657	ureteric bud development	2.47e-05	0.00276	3.09	12306	34	1756	15	[FGFR2 - fibroblast growth factor receptor 2, OSR1 - odd-skipped related 1 (drosophila), FOXC2 - forkhead box c2 (mfh-1, mesenchyme forkhead 1), TGFB1 - transforming growth factor, beta 1, SMAD1 - smad family member 1, SMAD2 - smad family member 2, SPRY1 - sprouty homolog 1, antagonist of fgf signaling (drosophila), SLIT2 - slit homolog 2 (drosophila), SALL1 - sal-like 1 (drosophila), NPNT - neph…
GO:0006301	postreplication repair	2.72e-05	0.003	2.95	12306	38	1756	16	[PCNA - proliferating cell nuclear antigen, RFC4 - replication factor c (activator 1) 4, 37kda, RFC5 - replication factor c (activator 1) 5, 36.5kda, RAD18 - rad18 homolog (s. cerevisiae), RFC2 - replication factor c (activator 1) 2, 40kda, RFC3 - replication factor c (activator 1) 3, 38kda, REV1 - rev1, polymerase (dna directed), BRCA1 - breast cancer 1, early onset, DTL - denticleless e3 ubiqui…
GO:0030335	positive regulation of cell migration	2.73e-05	0.003	1.59	12306	322	1756	73	[GPR124 - g protein-coupled receptor 124, ARHGEF39 - rho guanine nucleotide exchange factor (gef) 39, KIF20B - kinesin family member 20b, FLT4 - fms-related tyrosine kinase 4, SLC8A1 - solute carrier family 8 (sodium/calcium exchanger), member 1, NUMB - numb homolog (drosophila), LRRC16A - leucine rich repeat containing 16a, PLA2G7 - phospholipase a2, group vii (platelet-activating factor acetylh…
GO:0051171	regulation of nitrogen compound metabolic process	2.8e-05	0.00305	1.13	12306	3945	1756	637	[TRIB3 - tribbles homolog 3 (drosophila), PCGF5 - polycomb group ring finger 5, EXOSC9 - exosome component 9, PRRX1 - paired related homeobox 1, MAP3K8 - mitogen-activated protein kinase kinase kinase 8, AKAP12 - a kinase (prka) anchor protein 12, PATZ1 - poz (btb) and at hook containing zinc finger 1, LIF - leukemia inhibitory factor, IER2 - immediate early response 2, SPOCK1 - sparc/osteonectin…
GO:0044839	cell cycle G2/M phase transition	2.82e-05	0.00305	2.08	12306	108	1756	32	[CDC25A - cell division cycle 25a, CDK5RAP2 - cdk5 regulatory subunit associated protein 2, NEK2 - nima-related kinase 2, CCNB2 - cyclin b2, ARPP19 - camp-regulated phosphoprotein, 19kda, HAUS3 - haus augmin-like complex, subunit 3, TPD52L1 - tumor protein d52-like 1, CDK14 - cyclin-dependent kinase 14, CDC25C - cell division cycle 25c, CCNY - cyclin y, NES - nestin, FOXM1 - forkhead box m1, CIT …
GO:0061572	actin filament bundle organization	2.84e-05	0.00305	2.84	12306	42	1756	17	[LIMA1 - lim domain and actin binding 1, ADD2 - adducin 2 (beta), ACTN1 - actinin, alpha 1, PAWR - prkc, apoptosis, wt1, regulator, ACTN4 - actinin, alpha 4, MYO1B - myosin ib, BAIAP2L1 - bai1-associated protein 2-like 1, PLS3 - plastin 3, SPIRE1 - spire actin nucleation factor 1, FSCN1 - fascin homolog 1, actin-bundling protein (strongylocentrotus purpuratus), NEDD9 - neural precursor cell expre…
GO:0032200	telomere organization	2.9e-05	0.00309	2.41	12306	67	1756	23	[PCNA - proliferating cell nuclear antigen, RIF1 - rap1 interacting factor homolog (yeast), RFC4 - replication factor c (activator 1) 4, 37kda, RFC5 - replication factor c (activator 1) 5, 36.5kda, RFC2 - replication factor c (activator 1) 2, 40kda, RFC3 - replication factor c (activator 1) 3, 38kda, RAD51C - rad51 paralog c, BLM - bloom syndrome, recq helicase-like, ACD - adrenocortical dysplasi…
GO:0007167	enzyme linked receptor protein signaling pathway	3.16e-05	0.00335	1.44	12306	535	1756	110	[F11R - f11 receptor, FLT4 - fms-related tyrosine kinase 4, LIF - leukemia inhibitory factor, LIFR - leukemia inhibitory factor receptor alpha, INHBA - inhibin, beta a, NRP2 - neuropilin 2, SH2B2 - sh2b adaptor protein 2, ENG - endoglin, FOXC2 - forkhead box c2 (mfh-1, mesenchyme forkhead 1), BDNF - brain-derived neurotrophic factor, SPRED2 - sprouty-related, evh1 domain containing 2, SOX9 - sry …
GO:0046606	negative regulation of centrosome cycle	3.29e-05	0.00346	5.45	12306	9	1756	7	[CDK5RAP2 - cdk5 regulatory subunit associated protein 2, NEK2 - nima-related kinase 2, CCNF - cyclin f, MDM1 - mdm1 nuclear protein homolog (mouse), BRCA1 - breast cancer 1, early onset, TMEM67 - transmembrane protein 67, TRIM37 - tripartite motif containing 37]
GO:0042769	DNA damage response, detection of DNA damage	3.35e-05	0.00349	3.16	12306	31	1756	14	[PCNA - proliferating cell nuclear antigen, RFC4 - replication factor c (activator 1) 4, 37kda, RFC5 - replication factor c (activator 1) 5, 36.5kda, RAD18 - rad18 homolog (s. cerevisiae), RFC2 - replication factor c (activator 1) 2, 40kda, RFC3 - replication factor c (activator 1) 3, 38kda, NEK1 - nima-related kinase 1, DTL - denticleless e3 ubiquitin protein ligase homolog (drosophila), USP1 - …
GO:0050790	regulation of catalytic activity	3.48e-05	0.0036	1.22	12306	1806	1756	314	[RGS19 - regulator of g-protein signaling 19, BOK - bcl2-related ovarian killer, TRIB3 - tribbles homolog 3 (drosophila), RFC4 - replication factor c (activator 1) 4, 37kda, ANP32E - acidic (leucine-rich) nuclear phosphoprotein 32 family, member e, RFC5 - replication factor c (activator 1) 5, 36.5kda, SH3BP1 - sh3-domain binding protein 1, RFC2 - replication factor c (activator 1) 2, 40kda, RFC3 …
GO:0000910	cytokinesis	3.69e-05	0.0038	2.55	12306	55	1756	20	[CENPA - centromere protein a, PLK1 - polo-like kinase 1, STMN1 - stathmin 1, SPIRE1 - spire actin nucleation factor 1, MYH10 - myosin, heavy chain 10, non-muscle, NUSAP1 - nucleolar and spindle associated protein 1, CEP55 - centrosomal protein 55kda, ANLN - anillin, actin binding protein, KIF20A - kinesin family member 20a, TTC19 - tetratricopeptide repeat domain 19, SNX18 - sorting nexin 18, RA…
GO:0033045	regulation of sister chromatid segregation	3.69e-05	0.00377	2.55	12306	55	1756	20	[CDC6 - cell division cycle 6, BUB1 - bub1 mitotic checkpoint serine/threonine kinase, SFPQ - splicing factor proline/glutamine-rich, BUB1B - bub1 mitotic checkpoint serine/threonine kinase b, PLK1 - polo-like kinase 1, MAD2L1 - mad2 mitotic arrest deficient-like 1 (yeast), CENPE - centromere protein e, 312kda, UBE2C - ubiquitin-conjugating enzyme e2c, CENPF - centromere protein f, 350/400kda, KL…
GO:0030071	regulation of mitotic metaphase/anaphase transition	3.76e-05	0.00381	3	12306	35	1756	15	[CDC6 - cell division cycle 6, BUB1 - bub1 mitotic checkpoint serine/threonine kinase, PLK1 - polo-like kinase 1, BUB1B - bub1 mitotic checkpoint serine/threonine kinase b, MAD2L1 - mad2 mitotic arrest deficient-like 1 (yeast), CENPE - centromere protein e, 312kda, UBE2C - ubiquitin-conjugating enzyme e2c, CENPF - centromere protein f, 350/400kda, CDT1 - chromatin licensing and dna replication fa…
GO:0030509	BMP signaling pathway	3.8e-05	0.00382	2.37	12306	68	1756	23	[RGMB - rgm domain family, member b, ID1 - inhibitor of dna binding 1, dominant negative helix-loop-helix protein, TGFB2 - transforming growth factor, beta 2, TGFB3 - transforming growth factor, beta 3, SMAD1 - smad family member 1, TGFB1 - transforming growth factor, beta 1, ACVR2A - activin a receptor, type iia, NKX2-5 - nk2 homeobox 5, GDF15 - growth differentiation factor 15, RUNX2 - runt-rel…
GO:2001141	regulation of RNA biosynthetic process	4.26e-05	0.00425	1.18	12306	2391	1756	403	[TRIB3 - tribbles homolog 3 (drosophila), PCGF5 - polycomb group ring finger 5, EXOSC9 - exosome component 9, PRRX1 - paired related homeobox 1, PATZ1 - poz (btb) and at hook containing zinc finger 1, LIF - leukemia inhibitory factor, IER2 - immediate early response 2, CHAF1B - chromatin assembly factor 1, subunit b (p60), LZTR1 - leucine-zipper-like transcription regulator 1, MLLT11 - myeloid/ly…
GO:0051716	cellular response to stimulus	4.27e-05	0.00423	1.2	12306	2005	1756	344	[BOK - bcl2-related ovarian killer, TRIB3 - tribbles homolog 3 (drosophila), RFC4 - replication factor c (activator 1) 4, 37kda, GFPT1 - glutamine--fructose-6-phosphate transaminase 1, RFC5 - replication factor c (activator 1) 5, 36.5kda, RFC2 - replication factor c (activator 1) 2, 40kda, HVCN1 - hydrogen voltage-gated channel 1, RFC3 - replication factor c (activator 1) 3, 38kda, MAP3K8 - mitog…
GO:0043534	blood vessel endothelial cell migration	4.28e-05	0.00422	3.67	12306	21	1756	11	[FGF2 - fibroblast growth factor 2 (basic), GREM1 - gremlin 1, dan family bmp antagonist, VEGFA - vascular endothelial growth factor a, ID1 - inhibitor of dna binding 1, dominant negative helix-loop-helix protein, SOX18 - sry (sex determining region y)-box 18, PTK2B - protein tyrosine kinase 2 beta, EFNB2 - ephrin-b2, SLIT2 - slit homolog 2 (drosophila), GPX1 - glutathione peroxidase 1, MYH9 - my…
GO:1903506	regulation of nucleic acid-templated transcription	4.36e-05	0.00427	1.18	12306	2385	1756	402	[TRIB3 - tribbles homolog 3 (drosophila), PCGF5 - polycomb group ring finger 5, EXOSC9 - exosome component 9, PRRX1 - paired related homeobox 1, PATZ1 - poz (btb) and at hook containing zinc finger 1, LIF - leukemia inhibitory factor, IER2 - immediate early response 2, CHAF1B - chromatin assembly factor 1, subunit b (p60), LZTR1 - leucine-zipper-like transcription regulator 1, MLLT11 - myeloid/ly…
GO:0030010	establishment of cell polarity	4.6e-05	0.00447	2.45	12306	60	1756	21	[PKD1 - polycystic kidney disease 1 (autosomal dominant), SH3BP1 - sh3-domain binding protein 1, WEE1 - wee1 homolog (s. pombe), KIF26B - kinesin family member 26b, MPP5 - membrane protein, palmitoylated 5 (maguk p55 subfamily member 5), FSCN1 - fascin homolog 1, actin-bundling protein (strongylocentrotus purpuratus), MYH9 - myosin, heavy chain 9, non-muscle, HES1 - hairy and enhancer of split 1,…
GO:2000145	regulation of cell motility	4.67e-05	0.0045	1.41	12306	587	1756	118	[GPR124 - g protein-coupled receptor 124, PHLDB2 - pleckstrin homology-like domain, family b, member 2, SH3BP1 - sh3-domain binding protein 1, ARHGEF39 - rho guanine nucleotide exchange factor (gef) 39, KIF20B - kinesin family member 20b, FLT4 - fms-related tyrosine kinase 4, LRRC16A - leucine rich repeat containing 16a, PODXL - podocalyxin-like, NRP2 - neuropilin 2, C16orf45 - chromosome 16 open…
GO:0006268	DNA unwinding involved in DNA replication	5.15e-05	0.00494	6.01	12306	7	1756	6	[MCM4 - minichromosome maintenance complex component 4, RAD51 - rad51 recombinase, MCM6 - minichromosome maintenance complex component 6, MCM7 - minichromosome maintenance complex component 7, HMGA1 - high mobility group at-hook 1, MCM2 - minichromosome maintenance complex component 2]
GO:0045893	positive regulation of transcription, DNA-templated	5.21e-05	0.00496	1.28	12306	1108	1756	203	[PCGF5 - polycomb group ring finger 5, EXOSC9 - exosome component 9, PRRX1 - paired related homeobox 1, RFXAP - regulatory factor x-associated protein, BRCA1 - breast cancer 1, early onset, PATZ1 - poz (btb) and at hook containing zinc finger 1, LIF - leukemia inhibitory factor, RFX2 - regulatory factor x, 2 (influences hla class ii expression), IER2 - immediate early response 2, ELK3 - elk3, ets…
GO:1903508	positive regulation of nucleic acid-templated transcription	5.21e-05	0.00493	1.28	12306	1108	1756	203	[PCGF5 - polycomb group ring finger 5, EXOSC9 - exosome component 9, PRRX1 - paired related homeobox 1, RFXAP - regulatory factor x-associated protein, BRCA1 - breast cancer 1, early onset, PATZ1 - poz (btb) and at hook containing zinc finger 1, LIF - leukemia inhibitory factor, RFX2 - regulatory factor x, 2 (influences hla class ii expression), IER2 - immediate early response 2, ELK3 - elk3, ets…
GO:0048519	negative regulation of biological process	5.37e-05	0.00505	1.14	12306	3558	1756	577	[TRIB3 - tribbles homolog 3 (drosophila), SH3BP1 - sh3-domain binding protein 1, EXOSC9 - exosome component 9, PRRX1 - paired related homeobox 1, KIF20B - kinesin family member 20b, CD2AP - cd2-associated protein, LRRC16A - leucine rich repeat containing 16a, PATZ1 - poz (btb) and at hook containing zinc finger 1, LIF - leukemia inhibitory factor, SPOCK1 - sparc/osteonectin, cwcv and kazal-like d…
GO:0051781	positive regulation of cell division	5.5e-05	0.00514	2.37	12306	65	1756	22	[CDC6 - cell division cycle 6, FGFR2 - fibroblast growth factor receptor 2, PDGFA - platelet-derived growth factor alpha polypeptide, KIF14 - kinesin family member 14, VEGFA - vascular endothelial growth factor a, TGFB2 - transforming growth factor, beta 2, TGFB3 - transforming growth factor, beta 3, VEGFC - vascular endothelial growth factor c, TGFB1 - transforming growth factor, beta 1, KIF20B …
GO:1902680	positive regulation of RNA biosynthetic process	5.5e-05	0.00511	1.28	12306	1109	1756	203	[PCGF5 - polycomb group ring finger 5, EXOSC9 - exosome component 9, PRRX1 - paired related homeobox 1, RFXAP - regulatory factor x-associated protein, BRCA1 - breast cancer 1, early onset, PATZ1 - poz (btb) and at hook containing zinc finger 1, LIF - leukemia inhibitory factor, RFX2 - regulatory factor x, 2 (influences hla class ii expression), IER2 - immediate early response 2, ELK3 - elk3, ets…
GO:0042325	regulation of phosphorylation	5.5e-05	0.00507	1.28	12306	1109	1756	203	[TRIB3 - tribbles homolog 3 (drosophila), FAM83D - family with sequence similarity 83, member d, MAP3K8 - mitogen-activated protein kinase kinase kinase 8, LIF - leukemia inhibitory factor, HES1 - hairy and enhancer of split 1, (drosophila), ENG - endoglin, KSR1 - kinase suppressor of ras 1, IQGAP3 - iq motif containing gtpase activating protein 3, SORBS3 - sorbin and sh3 domain containing 3, PLK…
GO:1902099	regulation of metaphase/anaphase transition of cell cycle	5.6e-05	0.00513	2.92	12306	36	1756	15	[CDC6 - cell division cycle 6, BUB1 - bub1 mitotic checkpoint serine/threonine kinase, PLK1 - polo-like kinase 1, BUB1B - bub1 mitotic checkpoint serine/threonine kinase b, MAD2L1 - mad2 mitotic arrest deficient-like 1 (yeast), CENPE - centromere protein e, 312kda, UBE2C - ubiquitin-conjugating enzyme e2c, CENPF - centromere protein f, 350/400kda, CDT1 - chromatin licensing and dna replication fa…
GO:1905818	regulation of chromosome separation	5.79e-05	0.00527	2.8	12306	40	1756	16	[CDC6 - cell division cycle 6, BUB1 - bub1 mitotic checkpoint serine/threonine kinase, PLK1 - polo-like kinase 1, BUB1B - bub1 mitotic checkpoint serine/threonine kinase b, MAD2L1 - mad2 mitotic arrest deficient-like 1 (yeast), CENPE - centromere protein e, 312kda, UBE2C - ubiquitin-conjugating enzyme e2c, CENPF - centromere protein f, 350/400kda, CDT1 - chromatin licensing and dna replication fa…
GO:0010936	negative regulation of macrophage cytokine production	5.89e-05	0.00533	7.01	12306	5	1756	5	[TGFB2 - transforming growth factor, beta 2, TGFB3 - transforming growth factor, beta 3, TGFB1 - transforming growth factor, beta 1, IRAK3 - interleukin-1 receptor-associated kinase 3, CUEDC2 - cue domain containing 2]
GO:0045859	regulation of protein kinase activity	5.93e-05	0.00533	1.39	12306	608	1756	121	[TRIB3 - tribbles homolog 3 (drosophila), CDC6 - cell division cycle 6, CEP85 - centrosomal protein 85kda, CDC25A - cell division cycle 25a, S1PR2 - sphingosine-1-phosphate receptor 2, MAP3K8 - mitogen-activated protein kinase kinase kinase 8, CDC25C - cell division cycle 25c, DBNDD2 - dysbindin (dystrobrevin binding protein 1) domain containing 2, ERRFI1 - erbb receptor feedback inhibitor 1, IQG…
GO:0030155	regulation of cell adhesion	6.14e-05	0.00548	1.44	12306	502	1756	103	[PHLDB2 - pleckstrin homology-like domain, family b, member 2, PAWR - prkc, apoptosis, wt1, regulator, KIFAP3 - kinesin-associated protein 3, MAP3K8 - mitogen-activated protein kinase kinase kinase 8, CDH1 - cadherin 1, type 1, e-cadherin (epithelial), LRRC16A - leucine rich repeat containing 16a, SPOCK1 - sparc/osteonectin, cwcv and kazal-like domains proteoglycan (testican) 1, PODXL - podocalyx…
GO:0022610	biological adhesion	6.39e-05	0.00568	1.39	12306	609	1756	121	[PDLIM5 - pdz and lim domain 5, ITGA8 - integrin, alpha 8, TNFRSF12A - tumor necrosis factor receptor superfamily, member 12a, CDH1 - cadherin 1, type 1, e-cadherin (epithelial), F11R - f11 receptor, PVRL3 - poliovirus receptor-related 3, CDH3 - cadherin 3, type 1, p-cadherin (placental), CD2AP - cd2-associated protein, CDH2 - cadherin 2, type 1, n-cadherin (neuronal), SPOCK1 - sparc/osteonectin,…
GO:0048870	cell motility	6.44e-05	0.00568	1.38	12306	639	1756	126	[GPR124 - g protein-coupled receptor 124, FAM83D - family with sequence similarity 83, member d, SH3BP1 - sh3-domain binding protein 1, F11R - f11 receptor, LRRC16A - leucine rich repeat containing 16a, CDH2 - cadherin 2, type 1, n-cadherin (neuronal), ANLN - anillin, actin binding protein, SPOCK1 - sparc/osteonectin, cwcv and kazal-like domains proteoglycan (testican) 1, IER2 - immediate early r…
GO:2001020	regulation of response to DNA damage stimulus	6.55e-05	0.00574	1.91	12306	132	1756	36	[WDR76 - wd repeat domain 76, BRCA1 - breast cancer 1, early onset, RAD52 - rad52 homolog (s. cerevisiae), DYRK3 - dual-specificity tyrosine-(y)-phosphorylation regulated kinase 3, TP53BP1 - tumor protein p53 binding protein 1, USP1 - ubiquitin specific peptidase 1, SPRED1 - sprouty-related, evh1 domain containing 1, FOXM1 - forkhead box m1, ATR - ataxia telangiectasia and rad3 related, PCNA - pr…
GO:0016310	phosphorylation	6.61e-05	0.00576	1.31	12306	901	1756	169	[TRIB3 - tribbles homolog 3 (drosophila), BIRC5 - baculoviral iap repeat containing 5, MAP3K8 - mitogen-activated protein kinase kinase kinase 8, FLT4 - fms-related tyrosine kinase 4, LIF - leukemia inhibitory factor, ABI2 - abl-interactor 2, ZFP36L1 - zfp36 ring finger protein-like 1, SEPHS1 - selenophosphate synthetase 1, TOLLIP - toll interacting protein, IMPA2 - inositol(myo)-1(or 4)-monophos…
GO:0051216	cartilage development	6.66e-05	0.00577	2.46	12306	57	1756	20	[PKD1 - polycystic kidney disease 1 (autosomal dominant), TIMP1 - timp metallopeptidase inhibitor 1, CSGALNACT1 - chondroitin sulfate n-acetylgalactosaminyltransferase 1, PITX1 - paired-like homeodomain 1, PRRX1 - paired related homeobox 1, SMAD1 - smad family member 1, SOX9 - sry (sex determining region y)-box 9, DLX2 - distal-less homeobox 2, SOX6 - sry (sex determining region y)-box 6, SHOX2 -…
GO:0008284	positive regulation of cell proliferation	6.92e-05	0.00596	1.38	12306	634	1756	125	[CDC6 - cell division cycle 6, CDC20 - cell division cycle 20, S1PR2 - sphingosine-1-phosphate receptor 2, BIRC5 - baculoviral iap repeat containing 5, PRRX1 - paired related homeobox 1, KIF20B - kinesin family member 20b, CDH3 - cadherin 3, type 1, p-cadherin (placental), FLT4 - fms-related tyrosine kinase 4, LIF - leukemia inhibitory factor, LIFR - leukemia inhibitory factor receptor alpha, SAP…
GO:2000147	positive regulation of cell motility	7.09e-05	0.00607	1.55	12306	331	1756	73	[GPR124 - g protein-coupled receptor 124, ARHGEF39 - rho guanine nucleotide exchange factor (gef) 39, KIF20B - kinesin family member 20b, FLT4 - fms-related tyrosine kinase 4, SLC8A1 - solute carrier family 8 (sodium/calcium exchanger), member 1, NUMB - numb homolog (drosophila), LRRC16A - leucine rich repeat containing 16a, PLA2G7 - phospholipase a2, group vii (platelet-activating factor acetylh…
GO:0031399	regulation of protein modification process	7.21e-05	0.00614	1.25	12306	1303	1756	233	[TRIB3 - tribbles homolog 3 (drosophila), FAM83D - family with sequence similarity 83, member d, MAP3K8 - mitogen-activated protein kinase kinase kinase 8, BRCA1 - breast cancer 1, early onset, LIF - leukemia inhibitory factor, TICAM1 - toll-like receptor adaptor molecule 1, HES1 - hairy and enhancer of split 1, (drosophila), ENG - endoglin, IQGAP3 - iq motif containing gtpase activating protein …
GO:0051252	regulation of RNA metabolic process	7.34e-05	0.00621	1.17	12306	2537	1756	423	[TRIB3 - tribbles homolog 3 (drosophila), PCGF5 - polycomb group ring finger 5, EXOSC9 - exosome component 9, PRRX1 - paired related homeobox 1, PATZ1 - poz (btb) and at hook containing zinc finger 1, LIF - leukemia inhibitory factor, IER2 - immediate early response 2, CHAF1B - chromatin assembly factor 1, subunit b (p60), LZTR1 - leucine-zipper-like transcription regulator 1, MLLT11 - myeloid/ly…
GO:0051338	regulation of transferase activity	7.34e-05	0.00617	1.34	12306	780	1756	149	[CDC6 - cell division cycle 6, TRIB3 - tribbles homolog 3 (drosophila), CEP85 - centrosomal protein 85kda, RFC4 - replication factor c (activator 1) 4, 37kda, CDC25A - cell division cycle 25a, RFC5 - replication factor c (activator 1) 5, 36.5kda, DUSP12 - dual specificity phosphatase 12, CDC20 - cell division cycle 20, S1PR2 - sphingosine-1-phosphate receptor 2, RFC2 - replication factor c (activ…
GO:0060249	anatomical structure homeostasis	7.37e-05	0.00616	1.75	12306	184	1756	46	[RFC4 - replication factor c (activator 1) 4, 37kda, BARD1 - brca1 associated ring domain 1, RFC5 - replication factor c (activator 1) 5, 36.5kda, RFC2 - replication factor c (activator 1) 2, 40kda, RFC3 - replication factor c (activator 1) 3, 38kda, POC1B - poc1 centriolar protein b, RAD51C - rad51 paralog c, AKR1B1 - aldo-keto reductase family 1, member b1 (aldose reductase), CDH3 - cadherin 3,…
GO:0006298	mismatch repair	7.47e-05	0.00621	3.5	12306	22	1756	11	[PCNA - proliferating cell nuclear antigen, MSH3 - muts homolog 3 (e. coli), POLD4 - polymerase (dna-directed), delta 4, accessory subunit, POLD2 - polymerase (dna directed), delta 2, accessory subunit, RNASEH2A - ribonuclease h2, subunit a, POLD3 - polymerase (dna-directed), delta 3, accessory subunit, XPC - xeroderma pigmentosum, complementation group c, ERCC1 - excision repair cross-complement…
GO:0048583	regulation of response to stimulus	7.48e-05	0.00618	1.16	12306	2823	1756	466	[TRIB3 - tribbles homolog 3 (drosophila), SH3BP1 - sh3-domain binding protein 1, ARHGEF39 - rho guanine nucleotide exchange factor (gef) 39, PRRX1 - paired related homeobox 1, MAP3K8 - mitogen-activated protein kinase kinase kinase 8, TNFRSF12A - tumor necrosis factor receptor superfamily, member 12a, WDR76 - wd repeat domain 76, CD2AP - cd2-associated protein, LIF - leukemia inhibitory factor, A…
GO:0031328	positive regulation of cellular biosynthetic process	7.6e-05	0.00625	1.24	12306	1393	1756	247	[PCGF5 - polycomb group ring finger 5, RFC4 - replication factor c (activator 1) 4, 37kda, RFC5 - replication factor c (activator 1) 5, 36.5kda, EXOSC9 - exosome component 9, RFC2 - replication factor c (activator 1) 2, 40kda, RFC3 - replication factor c (activator 1) 3, 38kda, PRRX1 - paired related homeobox 1, RFXAP - regulatory factor x-associated protein, BRCA1 - breast cancer 1, early onset,…
GO:0022607	cellular component assembly	7.69e-05	0.00628	1.22	12306	1643	1756	286	[BOK - bcl2-related ovarian killer, EMP1 - epithelial membrane protein 1, ANP32E - acidic (leucine-rich) nuclear phosphoprotein 32 family, member e, SH3BP1 - sh3-domain binding protein 1, KIFAP3 - kinesin-associated protein 3, CEP89 - centrosomal protein 89kda, WDR19 - wd repeat domain 19, SPIRE1 - spire actin nucleation factor 1, CDT1 - chromatin licensing and dna replication factor 1, ABLIM1 - …
GO:0007155	cell adhesion	7.96e-05	0.00647	1.39	12306	606	1756	120	[PDLIM5 - pdz and lim domain 5, ITGA8 - integrin, alpha 8, TNFRSF12A - tumor necrosis factor receptor superfamily, member 12a, F11R - f11 receptor, CDH1 - cadherin 1, type 1, e-cadherin (epithelial), PVRL3 - poliovirus receptor-related 3, CDH3 - cadherin 3, type 1, p-cadherin (placental), CD2AP - cd2-associated protein, CDH2 - cadherin 2, type 1, n-cadherin (neuronal), SPOCK1 - sparc/osteonectin,…
GO:0099118	microtubule-based protein transport	8.05e-05	0.00651	2.65	12306	45	1756	17	[WDR60 - wd repeat domain 60, DYNLRB2 - dynein, light chain, roadblock-type 2, MAK - male germ cell-associated kinase, CLUAP1 - clusterin associated protein 1, KIFAP3 - kinesin-associated protein 3, PCM1 - pericentriolar material 1, BBS12 - bardet-biedl syndrome 12, WDR19 - wd repeat domain 19, IFT57 - intraflagellar transport 57 homolog (chlamydomonas), IFT27 - intraflagellar transport 27 homolo…
GO:0098840	protein transport along microtubule	8.05e-05	0.00647	2.65	12306	45	1756	17	[DYNLRB2 - dynein, light chain, roadblock-type 2, WDR60 - wd repeat domain 60, MAK - male germ cell-associated kinase, CLUAP1 - clusterin associated protein 1, KIFAP3 - kinesin-associated protein 3, PCM1 - pericentriolar material 1, BBS12 - bardet-biedl syndrome 12, WDR19 - wd repeat domain 19, IFT27 - intraflagellar transport 27 homolog (chlamydomonas), IFT57 - intraflagellar transport 57 homolo…
GO:0033047	regulation of mitotic sister chromatid segregation	8.05e-05	0.00643	2.65	12306	45	1756	17	[CDC6 - cell division cycle 6, BUB1 - bub1 mitotic checkpoint serine/threonine kinase, PLK1 - polo-like kinase 1, BUB1B - bub1 mitotic checkpoint serine/threonine kinase b, MAD2L1 - mad2 mitotic arrest deficient-like 1 (yeast), CENPE - centromere protein e, 312kda, UBE2C - ubiquitin-conjugating enzyme e2c, CENPF - centromere protein f, 350/400kda, CDT1 - chromatin licensing and dna replication fa…
GO:0051272	positive regulation of cellular component movement	8.14e-05	0.00647	1.53	12306	338	1756	74	[GPR124 - g protein-coupled receptor 124, ARHGEF39 - rho guanine nucleotide exchange factor (gef) 39, KIF20B - kinesin family member 20b, FLT4 - fms-related tyrosine kinase 4, SLC8A1 - solute carrier family 8 (sodium/calcium exchanger), member 1, NUMB - numb homolog (drosophila), LRRC16A - leucine rich repeat containing 16a, PLA2G7 - phospholipase a2, group vii (platelet-activating factor acetylh…
GO:0097435	supramolecular fiber organization	8.14e-05	0.00644	1.6	12306	271	1756	62	[FHOD3 - formin homology 2 domain containing 3, SH3BP1 - sh3-domain binding protein 1, PAWR - prkc, apoptosis, wt1, regulator, NKX2-5 - nk2 homeobox 5, SPIRE1 - spire actin nucleation factor 1, LRRC16A - leucine rich repeat containing 16a, CD2AP - cd2-associated protein, ABI2 - abl-interactor 2, KIF24 - kinesin family member 24, PTK2B - protein tyrosine kinase 2 beta, COL14A1 - collagen, type xiv…
GO:0051017	actin filament bundle assembly	8.24e-05	0.00648	2.73	12306	41	1756	16	[LIMA1 - lim domain and actin binding 1, ADD2 - adducin 2 (beta), ACTN1 - actinin, alpha 1, PAWR - prkc, apoptosis, wt1, regulator, MYO1B - myosin ib, ACTN4 - actinin, alpha 4, BAIAP2L1 - bai1-associated protein 2-like 1, PLS3 - plastin 3, SPIRE1 - spire actin nucleation factor 1, FSCN1 - fascin homolog 1, actin-bundling protein (strongylocentrotus purpuratus), NEDD9 - neural precursor cell expre…
GO:0051052	regulation of DNA metabolic process	8.39e-05	0.00656	1.57	12306	299	1756	67	[CDC6 - cell division cycle 6, RFC4 - replication factor c (activator 1) 4, 37kda, RFC5 - replication factor c (activator 1) 5, 36.5kda, RFC2 - replication factor c (activator 1) 2, 40kda, RFC3 - replication factor c (activator 1) 3, 38kda, NAF1 - nuclear assembly factor 1 ribonucleoprotein, BRCA1 - breast cancer 1, early onset, CDT1 - chromatin licensing and dna replication factor 1, SMC3 - stru…
GO:0051094	positive regulation of developmental process	8.45e-05	0.00657	1.3	12306	967	1756	179	[PHLDB2 - pleckstrin homology-like domain, family b, member 2, CDC20 - cell division cycle 20, S1PR2 - sphingosine-1-phosphate receptor 2, PAWR - prkc, apoptosis, wt1, regulator, KIF20B - kinesin family member 20b, TNFRSF12A - tumor necrosis factor receptor superfamily, member 12a, BRCA1 - breast cancer 1, early onset, TCF12 - transcription factor 12, GORAB - golgin, rab6-interacting, LRRC16A - l…
GO:0035239	tube morphogenesis	8.48e-05	0.00655	1.74	12306	185	1756	46	[PKD1 - polycystic kidney disease 1 (autosomal dominant), PKD2 - polycystic kidney disease 2 (autosomal dominant), OSR1 - odd-skipped related 1 (drosophila), NKX2-5 - nk2 homeobox 5, SLIT2 - slit homolog 2 (drosophila), IFT57 - intraflagellar transport 57 homolog (chlamydomonas), MICAL2 - microtubule associated monooxygenase, calponin and lim domain containing 2, MKS1 - meckel syndrome, type 1, H…
GO:0110053	regulation of actin filament organization	8.78e-05	0.00675	1.75	12306	180	1756	45	[FHOD3 - formin homology 2 domain containing 3, PHLDB2 - pleckstrin homology-like domain, family b, member 2, SH3BP1 - sh3-domain binding protein 1, BAIAP2L1 - bai1-associated protein 2-like 1, CAPG - capping protein (actin filament), gelsolin-like, SPIRE1 - spire actin nucleation factor 1, SLC9A1 - solute carrier family 9, subfamily a (nhe1, cation proton antiporter 1), member 1, PFN2 - profilin…
GO:0051056	regulation of small GTPase mediated signal transduction	9e-05	0.00689	1.64	12306	239	1756	56	[SH3BP1 - sh3-domain binding protein 1, TIMP2 - timp metallopeptidase inhibitor 2, ARHGEF39 - rho guanine nucleotide exchange factor (gef) 39, CD2AP - cd2-associated protein, IQSEC2 - iq motif and sec7 domain 2, RACGAP1 - rac gtpase activating protein 1, ARHGEF6 - rac/cdc42 guanine nucleotide exchange factor (gef) 6, RASAL2 - ras protein activator like 2, SYDE1 - synapse defective 1, rho gtpase, …
GO:0001667	ameboidal-type cell migration	9.01e-05	0.00686	1.97	12306	114	1756	32	[GPR124 - g protein-coupled receptor 124, SEMA3A - sema domain, immunoglobulin domain (ig), short basic domain, secreted, (semaphorin) 3a, SLIT2 - slit homolog 2 (drosophila), GPX1 - glutathione peroxidase 1, ANLN - anillin, actin binding protein, MYH9 - myosin, heavy chain 9, non-muscle, CENPV - centromere protein v, SEMA3C - sema domain, immunoglobulin domain (ig), short basic domain, secreted,…
GO:0001763	morphogenesis of a branching structure	9.12e-05	0.0069	1.87	12306	139	1756	37	[PKD1 - polycystic kidney disease 1 (autosomal dominant), FGFR2 - fibroblast growth factor receptor 2, PKD2 - polycystic kidney disease 2 (autosomal dominant), DLX2 - distal-less homeobox 2, SLIT2 - slit homolog 2 (drosophila), MKS1 - meckel syndrome, type 1, FGF2 - fibroblast growth factor 2 (basic), GLI3 - gli family zinc finger 3, GLI2 - gli family zinc finger 2, RERE - arginine-glutamic acid …
GO:0045778	positive regulation of ossification	9.23e-05	0.00695	2.3	12306	67	1756	22	[SFRP2 - secreted frizzled-related protein 2, TGFB2 - transforming growth factor, beta 2, OSR1 - odd-skipped related 1 (drosophila), TGFB3 - transforming growth factor, beta 3, SMAD1 - smad family member 1, TGFB1 - transforming growth factor, beta 1, CTHRC1 - collagen triple helix repeat containing 1, SOX11 - sry (sex determining region y)-box 11, ACVR2A - activin a receptor, type iia, PDLIM7 - p…
GO:0009891	positive regulation of biosynthetic process	9.34e-05	0.007	1.24	12306	1410	1756	249	[PCGF5 - polycomb group ring finger 5, RFC4 - replication factor c (activator 1) 4, 37kda, RFC5 - replication factor c (activator 1) 5, 36.5kda, EXOSC9 - exosome component 9, RFC2 - replication factor c (activator 1) 2, 40kda, RFC3 - replication factor c (activator 1) 3, 38kda, PRRX1 - paired related homeobox 1, RFXAP - regulatory factor x-associated protein, BRCA1 - breast cancer 1, early onset,…
GO:0051254	positive regulation of RNA metabolic process	9.48e-05	0.00706	1.27	12306	1163	1756	210	[PCGF5 - polycomb group ring finger 5, EXOSC9 - exosome component 9, PRRX1 - paired related homeobox 1, RFXAP - regulatory factor x-associated protein, BRCA1 - breast cancer 1, early onset, RFX2 - regulatory factor x, 2 (influences hla class ii expression), LIF - leukemia inhibitory factor, PATZ1 - poz (btb) and at hook containing zinc finger 1, IER2 - immediate early response 2, ELK3 - elk3, ets…
GO:0040017	positive regulation of locomotion	9.59e-05	0.00711	1.52	12306	351	1756	76	[GPR124 - g protein-coupled receptor 124, ARHGEF39 - rho guanine nucleotide exchange factor (gef) 39, KIF20B - kinesin family member 20b, FLT4 - fms-related tyrosine kinase 4, SLC8A1 - solute carrier family 8 (sodium/calcium exchanger), member 1, NUMB - numb homolog (drosophila), LRRC16A - leucine rich repeat containing 16a, SMC3 - structural maintenance of chromosomes 3, PLA2G7 - phospholipase a…
GO:0046578	regulation of Ras protein signal transduction	9.65e-05	0.00711	1.78	12306	165	1756	42	[ARHGAP42 - rho gtpase activating protein 42, KIF14 - kinesin family member 14, MFN2 - mitofusin 2, TIMP2 - timp metallopeptidase inhibitor 2, ARHGEF39 - rho guanine nucleotide exchange factor (gef) 39, ITGA3 - integrin, alpha 3 (antigen cd49c, alpha 3 subunit of vla-3 receptor), ARRB1 - arrestin, beta 1, IQSEC2 - iq motif and sec7 domain 2, ARHGEF6 - rac/cdc42 guanine nucleotide exchange factor …
GO:0007389	pattern specification process	9.93e-05	0.00729	1.57	12306	295	1756	66	[NKX2-5 - nk2 homeobox 5, MKS1 - meckel syndrome, type 1, PBX2 - pre-b-cell leukemia homeobox 2, PBX3 - pre-b-cell leukemia homeobox 3, IFT74 - intraflagellar transport 74 homolog (chlamydomonas), CDON - cell adhesion associated, oncogene regulated, WNT2B - wingless-type mmtv integration site family, member 2b, MNS1 - meiosis-specific nuclear structural 1, MLLT3 - myeloid/lymphoid or mixed-lineag…
GO:0043535	regulation of blood vessel endothelial cell migration	0.000104	0.00761	2.52	12306	50	1756	18	[ANGPT1 - angiopoietin 1, MEOX2 - mesenchyme homeobox 2, SH3BP1 - sh3-domain binding protein 1, VEGFA - vascular endothelial growth factor a, FOXC2 - forkhead box c2 (mfh-1, mesenchyme forkhead 1), VEGFC - vascular endothelial growth factor c, TGFB1 - transforming growth factor, beta 1, SRPX2 - sushi-repeat containing protein, x-linked 2, KLF4 - kruppel-like factor 4 (gut), HSPB1 - heat shock 27k…
GO:0048754	branching morphogenesis of an epithelial tube	0.000106	0.00773	1.97	12306	110	1756	31	[PKD1 - polycystic kidney disease 1 (autosomal dominant), PKD2 - polycystic kidney disease 2 (autosomal dominant), SLIT2 - slit homolog 2 (drosophila), MKS1 - meckel syndrome, type 1, FGF2 - fibroblast growth factor 2 (basic), GLI3 - gli family zinc finger 3, GLI2 - gli family zinc finger 2, RSPO2 - r-spondin 2, ENG - endoglin, CTNNB1 - catenin (cadherin-associated protein), beta 1, 88kda, VDR - …
GO:0034405	response to fluid shear stress	0.000108	0.00781	3.04	12306	30	1756	13	[PKD1 - polycystic kidney disease 1 (autosomal dominant), PKD2 - polycystic kidney disease 2 (autosomal dominant), TGFB3 - transforming growth factor, beta 3, TGFB1 - transforming growth factor, beta 1, SOCS5 - suppressor of cytokine signaling 5, KLF2 - kruppel-like factor 2 (lung), ASS1 - argininosuccinate synthase 1, KLF4 - kruppel-like factor 4 (gut), PTK2B - protein tyrosine kinase 2 beta, SR…
GO:0051293	establishment of spindle localization	0.000108	0.00777	3.04	12306	30	1756	13	[CENPA - centromere protein a, CDK5RAP2 - cdk5 regulatory subunit associated protein 2, SPRY1 - sprouty homolog 1, antagonist of fgf signaling (drosophila), SPIRE1 - spire actin nucleation factor 1, SPRY2 - sprouty homolog 2 (drosophila), SPDL1 - spindle apparatus coiled-coil protein 1, NUSAP1 - nucleolar and spindle associated protein 1, NDC80 - ndc80 kinetochore complex component, MYH9 - myosin…
GO:0043085	positive regulation of catalytic activity	0.000108	0.00773	1.25	12306	1254	1756	224	[RGS19 - regulator of g-protein signaling 19, BOK - bcl2-related ovarian killer, TRIB3 - tribbles homolog 3 (drosophila), RFC4 - replication factor c (activator 1) 4, 37kda, RFC5 - replication factor c (activator 1) 5, 36.5kda, SH3BP1 - sh3-domain binding protein 1, RFC2 - replication factor c (activator 1) 2, 40kda, RFC3 - replication factor c (activator 1) 3, 38kda, ARHGEF39 - rho guanine nucle…
GO:0044093	positive regulation of molecular function	0.000109	0.00775	1.23	12306	1490	1756	261	[RGS19 - regulator of g-protein signaling 19, BOK - bcl2-related ovarian killer, TRIB3 - tribbles homolog 3 (drosophila), RFC4 - replication factor c (activator 1) 4, 37kda, RFC5 - replication factor c (activator 1) 5, 36.5kda, SH3BP1 - sh3-domain binding protein 1, RFC2 - replication factor c (activator 1) 2, 40kda, RFC3 - replication factor c (activator 1) 3, 38kda, ARHGEF39 - rho guanine nucle…
GO:0046605	regulation of centrosome cycle	0.000116	0.00819	2.67	12306	42	1756	16	[CEP85 - centrosomal protein 85kda, CHEK1 - checkpoint kinase 1, CDK5RAP2 - cdk5 regulatory subunit associated protein 2, NEK2 - nima-related kinase 2, CCNF - cyclin f, BRCA1 - breast cancer 1, early onset, PLK4 - polo-like kinase 4, MAP9 - microtubule-associated protein 9, TRIM37 - tripartite motif containing 37, KIF11 - kinesin family member 11, AZI1 - 5-azacytidine induced 1, STIL - scl/tal1 i…
GO:0010001	glial cell differentiation	0.000116	0.00816	2.38	12306	59	1756	20	[BOK - bcl2-related ovarian killer, EGR2 - early growth response 2, VIM - vimentin, SOX9 - sry (sex determining region y)-box 9, SOX6 - sry (sex determining region y)-box 6, CDH2 - cadherin 2, type 1, n-cadherin (neuronal), FGF5 - fibroblast growth factor 5, NAB1 - ngfi-a binding protein 1 (egr1 binding protein 1), METRN - meteorin, glial cell differentiation regulator, NAB2 - ngfi-a binding prot…
GO:0032392	DNA geometric change	0.000118	0.0083	2.27	12306	68	1756	22	[MCM7 - minichromosome maintenance complex component 7, XPC - xeroderma pigmentosum, complementation group c, RAD54L - rad54-like (s. cerevisiae), HMGB3 - high mobility group box 3, BLM - bloom syndrome, recq helicase-like, HELB - helicase (dna) b, GINS1 - gins complex subunit 1 (psf1 homolog), HMGB2 - high mobility group box 2, CHD1L - chromodomain helicase dna binding protein 1-like, GINS4 - gi…
GO:0040012	regulation of locomotion	0.000122	0.00854	1.37	12306	636	1756	124	[GPR124 - g protein-coupled receptor 124, PHLDB2 - pleckstrin homology-like domain, family b, member 2, SH3BP1 - sh3-domain binding protein 1, ARHGEF39 - rho guanine nucleotide exchange factor (gef) 39, KIF20B - kinesin family member 20b, FLT4 - fms-related tyrosine kinase 4, LRRC16A - leucine rich repeat containing 16a, PODXL - podocalyxin-like, NRP2 - neuropilin 2, PTPN23 - protein tyrosine pho…
GO:0040001	establishment of mitotic spindle localization	0.000125	0.00866	3.35	12306	23	1756	11	[EYA1 - eyes absent homolog 1 (drosophila), CENPA - centromere protein a, CDK5RAP2 - cdk5 regulatory subunit associated protein 2, GPSM2 - g-protein signaling modulator 2, SPRY1 - sprouty homolog 1, antagonist of fgf signaling (drosophila), SPRY2 - sprouty homolog 2 (drosophila), ESPL1 - extra spindle pole bodies homolog 1 (s. cerevisiae), SPDL1 - spindle apparatus coiled-coil protein 1, NDC80 - …
GO:0032970	regulation of actin filament-based process	0.000128	0.00886	1.59	12306	264	1756	60	[FHOD3 - formin homology 2 domain containing 3, PHLDB2 - pleckstrin homology-like domain, family b, member 2, SH3BP1 - sh3-domain binding protein 1, CAPG - capping protein (actin filament), gelsolin-like, F11R - f11 receptor, SPIRE1 - spire actin nucleation factor 1, SLC9A1 - solute carrier family 9, subfamily a (nhe1, cation proton antiporter 1), member 1, PFN2 - profilin 2, LRRC16A - leucine ri…
GO:0061138	morphogenesis of a branching epithelium	0.000129	0.00886	1.87	12306	131	1756	35	[FGFR2 - fibroblast growth factor receptor 2, PKD1 - polycystic kidney disease 1 (autosomal dominant), PKD2 - polycystic kidney disease 2 (autosomal dominant), SLIT2 - slit homolog 2 (drosophila), MKS1 - meckel syndrome, type 1, FGF2 - fibroblast growth factor 2 (basic), GLI3 - gli family zinc finger 3, GLI2 - gli family zinc finger 2, RSPO2 - r-spondin 2, ENG - endoglin, CTNNB1 - catenin (cadher…
GO:0034332	adherens junction organization	0.000134	0.00917	2.3	12306	64	1756	21	[CADM1 - cell adhesion molecule 1, PIP5K1C - phosphatidylinositol-4-phosphate 5-kinase, type i, gamma, RASSF8 - ras association (ralgds/af-6) domain family (n-terminal) member 8, ACTN1 - actinin, alpha 1, CDH24 - cadherin 24, type 2, CDH1 - cadherin 1, type 1, e-cadherin (epithelial), PVRL3 - poliovirus receptor-related 3, CDH3 - cadherin 3, type 1, p-cadherin (placental), NUMB - numb homolog (dr…
GO:0010557	positive regulation of macromolecule biosynthetic process	0.000136	0.00926	1.24	12306	1284	1756	228	[PCGF5 - polycomb group ring finger 5, RFC4 - replication factor c (activator 1) 4, 37kda, EXOSC9 - exosome component 9, RFC5 - replication factor c (activator 1) 5, 36.5kda, RFC2 - replication factor c (activator 1) 2, 40kda, RFC3 - replication factor c (activator 1) 3, 38kda, PRRX1 - paired related homeobox 1, RFXAP - regulatory factor x-associated protein, BRCA1 - breast cancer 1, early onset,…
GO:0006355	regulation of transcription, DNA-templated	0.000139	0.00943	1.17	12306	2369	1756	395	[TRIB3 - tribbles homolog 3 (drosophila), PCGF5 - polycomb group ring finger 5, EXOSC9 - exosome component 9, PRRX1 - paired related homeobox 1, PATZ1 - poz (btb) and at hook containing zinc finger 1, LIF - leukemia inhibitory factor, IER2 - immediate early response 2, CHAF1B - chromatin assembly factor 1, subunit b (p60), LZTR1 - leucine-zipper-like transcription regulator 1, MLLT11 - myeloid/ly…
GO:0097711	ciliary basal body-plasma membrane docking	0.000143	0.00968	2.16	12306	78	1756	24	[PCNT - pericentrin, CNTRL - centriolin, IQCB1 - iq motif containing b1, CEP97 - centrosomal protein 97kda, CDK5RAP2 - cdk5 regulatory subunit associated protein 2, PLK1 - polo-like kinase 1, NEK2 - nima-related kinase 2, NPHP1 - nephronophthisis 1 (juvenile), PCM1 - pericentriolar material 1, CEP89 - centrosomal protein 89kda, NPHP4 - nephronophthisis 4, HAUS3 - haus augmin-like complex, subunit…
GO:0010634	positive regulation of epithelial cell migration	0.000144	0.00967	2.02	12306	97	1756	28	[GPR124 - g protein-coupled receptor 124, FLT4 - fms-related tyrosine kinase 4, ITGA3 - integrin, alpha 3 (antigen cd49c, alpha 3 subunit of vla-3 receptor), FGF2 - fibroblast growth factor 2 (basic), SEMA5A - sema domain, seven thrombospondin repeats (type 1 and type 1-like), transmembrane domain (tm) and short cytoplasmic domain, (semaphorin) 5a, NRP2 - neuropilin 2, PTK2B - protein tyrosine ki…
GO:0010594	regulation of endothelial cell migration	0.000148	0.0099	1.99	12306	102	1756	29	[GPR124 - g protein-coupled receptor 124, SH3BP1 - sh3-domain binding protein 1, FLT4 - fms-related tyrosine kinase 4, SLIT2 - slit homolog 2 (drosophila), FGF2 - fibroblast growth factor 2 (basic), SEMA5A - sema domain, seven thrombospondin repeats (type 1 and type 1-like), transmembrane domain (tm) and short cytoplasmic domain, (semaphorin) 5a, SPRED1 - sprouty-related, evh1 domain containing 1…
GO:0001944	vasculature development	0.000148	0.00987	3.11	12306	27	1756	12	[ANGPT1 - angiopoietin 1, ERRFI1 - erbb receptor feedback inhibitor 1, HES1 - hairy and enhancer of split 1, (drosophila), ROM1 - retinal outer segment membrane protein 1, ID1 - inhibitor of dna binding 1, dominant negative helix-loop-helix protein, SOX18 - sry (sex determining region y)-box 18, OSR1 - odd-skipped related 1 (drosophila), BMPR2 - bone morphogenetic protein receptor, type ii (serin…
GO:0045669	positive regulation of osteoblast differentiation	0.000151	0.01	2.53	12306	47	1756	17	[SFRP2 - secreted frizzled-related protein 2, CTHRC1 - collagen triple helix repeat containing 1, SMAD1 - smad family member 1, SOX11 - sry (sex determining region y)-box 11, ACVR2A - activin a receptor, type iia, PDLIM7 - pdz and lim domain 7 (enigma), RUNX2 - runt-related transcription factor 2, GLI3 - gli family zinc finger 3, NPNT - nephronectin, CLIC1 - chloride intracellular channel 1, BMPR…
GO:0031324	negative regulation of cellular metabolic process	0.000155	0.0102	1.2	12306	1769	1756	303	[TRIB3 - tribbles homolog 3 (drosophila), PRRX1 - paired related homeobox 1, BRCA1 - breast cancer 1, early onset, NAF1 - nuclear assembly factor 1 ribonucleoprotein, LIF - leukemia inhibitory factor, PATZ1 - poz (btb) and at hook containing zinc finger 1, SPOCK1 - sparc/osteonectin, cwcv and kazal-like domains proteoglycan (testican) 1, ELK3 - elk3, ets-domain protein (srf accessory protein 2), …
GO:0006468	protein phosphorylation	0.000156	0.0102	1.33	12306	749	1756	142	[TRIB3 - tribbles homolog 3 (drosophila), BIRC5 - baculoviral iap repeat containing 5, MAP3K8 - mitogen-activated protein kinase kinase kinase 8, FLT4 - fms-related tyrosine kinase 4, LIF - leukemia inhibitory factor, ABI2 - abl-interactor 2, ZFP36L1 - zfp36 ring finger protein-like 1, IQGAP3 - iq motif containing gtpase activating protein 3, KSR1 - kinase suppressor of ras 1, PLK1 - polo-like ki…
GO:0080090	regulation of primary metabolic process	0.000157	0.0103	1.12	12306	4053	1756	645	[TRIB3 - tribbles homolog 3 (drosophila), PCGF5 - polycomb group ring finger 5, EXOSC9 - exosome component 9, PRRX1 - paired related homeobox 1, MAP3K8 - mitogen-activated protein kinase kinase kinase 8, AKAP12 - a kinase (prka) anchor protein 12, PATZ1 - poz (btb) and at hook containing zinc finger 1, LIF - leukemia inhibitory factor, IER2 - immediate early response 2, SPOCK1 - sparc/osteonectin…
GO:0042073	intraciliary transport	0.00016	0.0104	2.61	12306	43	1756	16	[WDR60 - wd repeat domain 60, DYNLRB2 - dynein, light chain, roadblock-type 2, MAK - male germ cell-associated kinase, CLUAP1 - clusterin associated protein 1, KIFAP3 - kinesin-associated protein 3, PCM1 - pericentriolar material 1, BBS12 - bardet-biedl syndrome 12, WDR19 - wd repeat domain 19, IFT57 - intraflagellar transport 57 homolog (chlamydomonas), IFT27 - intraflagellar transport 27 homolo…
GO:0019985	translesion synthesis	0.000162	0.0105	2.94	12306	31	1756	13	[PCNA - proliferating cell nuclear antigen, RFC4 - replication factor c (activator 1) 4, 37kda, RFC5 - replication factor c (activator 1) 5, 36.5kda, RFC2 - replication factor c (activator 1) 2, 40kda, RFC3 - replication factor c (activator 1) 3, 38kda, REV1 - rev1, polymerase (dna directed), DTL - denticleless e3 ubiquitin protein ligase homolog (drosophila), POLH - polymerase (dna directed), et…
GO:0010632	regulation of epithelial cell migration	0.000163	0.0105	1.79	12306	153	1756	39	[GPR124 - g protein-coupled receptor 124, SH3BP1 - sh3-domain binding protein 1, SEMA3A - sema domain, immunoglobulin domain (ig), short basic domain, secreted, (semaphorin) 3a, FLT4 - fms-related tyrosine kinase 4, PFN2 - profilin 2, SLIT2 - slit homolog 2 (drosophila), ITGA3 - integrin, alpha 3 (antigen cd49c, alpha 3 subunit of vla-3 receptor), SPRED1 - sprouty-related, evh1 domain containing …
GO:0006325	chromatin organization	0.000169	0.0109	1.44	12306	444	1756	91	[CHD9 - chromodomain helicase dna binding protein 9, PCGF5 - polycomb group ring finger 5, ANP32E - acidic (leucine-rich) nuclear phosphoprotein 32 family, member e, PHF19 - phd finger protein 19, HMGB2 - high mobility group box 2, SIN3A - sin3 transcription regulator family member a, CENPV - centromere protein v, CHAF1B - chromatin assembly factor 1, subunit b (p60), BRD9 - bromodomain containin…
GO:0031503	protein complex localization	0.000171	0.011	2.26	12306	65	1756	21	[STXBP6 - syntaxin binding protein 6 (amisyn), WDR60 - wd repeat domain 60, DYNLRB2 - dynein, light chain, roadblock-type 2, MAK - male germ cell-associated kinase, CLUAP1 - clusterin associated protein 1, BIRC5 - baculoviral iap repeat containing 5, KIFAP3 - kinesin-associated protein 3, PCM1 - pericentriolar material 1, BBS12 - bardet-biedl syndrome 12, WDR19 - wd repeat domain 19, IFT57 - intr…
GO:0045595	regulation of cell differentiation	0.000179	0.0114	1.24	12306	1277	1756	226	[TRIB3 - tribbles homolog 3 (drosophila), PRRX1 - paired related homeobox 1, KIF20B - kinesin family member 20b, TNFRSF12A - tumor necrosis factor receptor superfamily, member 12a, LRRC16A - leucine rich repeat containing 16a, LIF - leukemia inhibitory factor, SPOCK1 - sparc/osteonectin, cwcv and kazal-like domains proteoglycan (testican) 1, HES1 - hairy and enhancer of split 1, (drosophila), PLX…
GO:0010826	negative regulation of centrosome duplication	0.000181	0.0115	5.26	12306	8	1756	6	[CDK5RAP2 - cdk5 regulatory subunit associated protein 2, CCNF - cyclin f, MDM1 - mdm1 nuclear protein homolog (mouse), BRCA1 - breast cancer 1, early onset, TMEM67 - transmembrane protein 67, TRIM37 - tripartite motif containing 37]
GO:0051382	kinetochore assembly	0.000181	0.0114	5.26	12306	8	1756	6	[CENPA - centromere protein a, CENPH - centromere protein h, CENPC - centromere protein c, CENPE - centromere protein e, 312kda, CENPT - centromere protein t, CENPF - centromere protein f, 350/400kda]
GO:0060255	regulation of macromolecule metabolic process	0.000184	0.0116	1.11	12306	4065	1756	646	[TRIB3 - tribbles homolog 3 (drosophila), PCGF5 - polycomb group ring finger 5, GFPT1 - glutamine--fructose-6-phosphate transaminase 1, EXOSC9 - exosome component 9, PRRX1 - paired related homeobox 1, MAP3K8 - mitogen-activated protein kinase kinase kinase 8, PATZ1 - poz (btb) and at hook containing zinc finger 1, LIF - leukemia inhibitory factor, IER2 - immediate early response 2, SPOCK1 - sparc…
GO:0022603	regulation of anatomical structure morphogenesis	0.00019	0.0119	1.31	12306	789	1756	148	[GPR124 - g protein-coupled receptor 124, PHLDB2 - pleckstrin homology-like domain, family b, member 2, PDLIM5 - pdz and lim domain 5, TNFRSF12A - tumor necrosis factor receptor superfamily, member 12a, FLT4 - fms-related tyrosine kinase 4, BRCA1 - breast cancer 1, early onset, LRRC16A - leucine rich repeat containing 16a, LIF - leukemia inhibitory factor, SAPCD2 - suppressor apc domain containin…
GO:0010628	positive regulation of gene expression	0.000196	0.0122	1.23	12306	1381	1756	242	[PCGF5 - polycomb group ring finger 5, EXOSC9 - exosome component 9, PRRX1 - paired related homeobox 1, RFXAP - regulatory factor x-associated protein, BRCA1 - breast cancer 1, early onset, RFX2 - regulatory factor x, 2 (influences hla class ii expression), LIF - leukemia inhibitory factor, PATZ1 - poz (btb) and at hook containing zinc finger 1, IER2 - immediate early response 2, TICAM1 - toll-li…
GO:0006266	DNA ligation	0.000197	0.0122	3.71	12306	17	1756	9	[PARP1 - poly (adp-ribose) polymerase 1, PCNA - proliferating cell nuclear antigen, POLD4 - polymerase (dna-directed), delta 4, accessory subunit, POLD2 - polymerase (dna directed), delta 2, accessory subunit, TOP2A - topoisomerase (dna) ii alpha 170kda, POLD3 - polymerase (dna-directed), delta 3, accessory subunit, HMGB2 - high mobility group box 2, LIG1 - ligase i, dna, atp-dependent, LIG3 - li…
GO:0019220	regulation of phosphate metabolic process	0.000197	0.0122	1.24	12306	1279	1756	226	[TRIB3 - tribbles homolog 3 (drosophila), FAM83D - family with sequence similarity 83, member d, MAP3K8 - mitogen-activated protein kinase kinase kinase 8, AKAP12 - a kinase (prka) anchor protein 12, LIF - leukemia inhibitory factor, HES1 - hairy and enhancer of split 1, (drosophila), FARP1 - ferm, rhogef (arhgef) and pleckstrin domain protein 1 (chondrocyte-derived), ENG - endoglin, KSR1 - kinas…
GO:0010556	regulation of macromolecule biosynthetic process	0.000209	0.0129	1.15	12306	2759	1756	452	[TRIB3 - tribbles homolog 3 (drosophila), PCGF5 - polycomb group ring finger 5, EXOSC9 - exosome component 9, PRRX1 - paired related homeobox 1, PATZ1 - poz (btb) and at hook containing zinc finger 1, LIF - leukemia inhibitory factor, IER2 - immediate early response 2, LIG3 - ligase iii, dna, atp-dependent, CHAF1B - chromatin assembly factor 1, subunit b (p60), LZTR1 - leucine-zipper-like transcr…
GO:0048568	embryonic organ development	0.000214	0.0131	1.95	12306	104	1756	29	[FGFR2 - fibroblast growth factor receptor 2, PDGFA - platelet-derived growth factor alpha polypeptide, PKD1 - polycystic kidney disease 1 (autosomal dominant), PKD2 - polycystic kidney disease 2 (autosomal dominant), TEAD3 - tea domain family member 3, WDR19 - wd repeat domain 19, TFEB - transcription factor eb, MKS1 - meckel syndrome, type 1, HES1 - hairy and enhancer of split 1, (drosophila), …
GO:0071900	regulation of protein serine/threonine kinase activity	0.000216	0.0131	1.45	12306	406	1756	84	[CDC6 - cell division cycle 6, TRIB3 - tribbles homolog 3 (drosophila), CDC25A - cell division cycle 25a, S1PR2 - sphingosine-1-phosphate receptor 2, PKIA - protein kinase (camp-dependent, catalytic) inhibitor alpha, MAP3K8 - mitogen-activated protein kinase kinase kinase 8, PTPRJ - protein tyrosine phosphatase, receptor type, j, CDC25C - cell division cycle 25c, PTK2B - protein tyrosine kinase 2…
GO:1902531	regulation of intracellular signal transduction	0.000219	0.0133	1.23	12306	1345	1756	236	[BOK - bcl2-related ovarian killer, TRIB3 - tribbles homolog 3 (drosophila), RFC4 - replication factor c (activator 1) 4, 37kda, FAM83D - family with sequence similarity 83, member d, RFC5 - replication factor c (activator 1) 5, 36.5kda, SH3BP1 - sh3-domain binding protein 1, RFC2 - replication factor c (activator 1) 2, 40kda, RFC3 - replication factor c (activator 1) 3, 38kda, ARHGEF39 - rho gua…
GO:0051054	positive regulation of DNA metabolic process	0.000234	0.0142	1.73	12306	166	1756	41	[PDGFA - platelet-derived growth factor alpha polypeptide, RFC4 - replication factor c (activator 1) 4, 37kda, RFC5 - replication factor c (activator 1) 5, 36.5kda, NEK2 - nima-related kinase 2, SHC1 - shc (src homology 2 domain containing) transforming protein 1, RFC2 - replication factor c (activator 1) 2, 40kda, RFC3 - replication factor c (activator 1) 3, 38kda, BRCA1 - breast cancer 1, early…
GO:0051239	regulation of multicellular organismal process	0.000236	0.0142	1.17	12306	2113	1756	354	[SH3BP1 - sh3-domain binding protein 1, PRRX1 - paired related homeobox 1, KIF20B - kinesin family member 20b, TNFRSF12A - tumor necrosis factor receptor superfamily, member 12a, BRCA1 - breast cancer 1, early onset, CD2AP - cd2-associated protein, GORAB - golgin, rab6-interacting, LIF - leukemia inhibitory factor, TRAIP - traf interacting protein, SPOCK1 - sparc/osteonectin, cwcv and kazal-like …
GO:0007166	cell surface receptor signaling pathway	0.000239	0.0143	1.21	12306	1501	1756	260	[BOK - bcl2-related ovarian killer, SH3BP1 - sh3-domain binding protein 1, TNFRSF12A - tumor necrosis factor receptor superfamily, member 12a, GPR64 - g protein-coupled receptor 64, WDR19 - wd repeat domain 19, LIF - leukemia inhibitory factor, IFT46 - intraflagellar transport 46 homolog (chlamydomonas), LIFR - leukemia inhibitory factor receptor alpha, TICAM1 - toll-like receptor adaptor molecul…
GO:0043549	regulation of kinase activity	0.00024	0.0143	1.34	12306	652	1756	125	[TRIB3 - tribbles homolog 3 (drosophila), CDC6 - cell division cycle 6, CEP85 - centrosomal protein 85kda, CDC25A - cell division cycle 25a, DUSP12 - dual specificity phosphatase 12, S1PR2 - sphingosine-1-phosphate receptor 2, MAP3K8 - mitogen-activated protein kinase kinase kinase 8, CDC25C - cell division cycle 25c, DBNDD2 - dysbindin (dystrobrevin binding protein 1) domain containing 2, ERRFI1…
GO:0009612	response to mechanical stimulus	0.000243	0.0145	1.74	12306	161	1756	40	[PKD1 - polycystic kidney disease 1 (autosomal dominant), PKD2 - polycystic kidney disease 2 (autosomal dominant), BAK1 - bcl2-antagonist/killer 1, PSPH - phosphoserine phosphatase, SLC9A1 - solute carrier family 9, subfamily a (nhe1, cation proton antiporter 1), member 1, XPC - xeroderma pigmentosum, complementation group c, SLC8A1 - solute carrier family 8 (sodium/calcium exchanger), member 1, …
GO:0072073	kidney epithelium development	0.000244	0.0144	2.38	12306	53	1756	18	[FGFR2 - fibroblast growth factor receptor 2, PKD1 - polycystic kidney disease 1 (autosomal dominant), PKD2 - polycystic kidney disease 2 (autosomal dominant), FOXC2 - forkhead box c2 (mfh-1, mesenchyme forkhead 1), OSR1 - odd-skipped related 1 (drosophila), TGFB1 - transforming growth factor, beta 1, SMAD1 - smad family member 1, SMAD2 - smad family member 2, SPRY1 - sprouty homolog 1, antagonis…
GO:0000725	recombinational repair	0.000249	0.0147	2.26	12306	62	1756	20	[SFPQ - splicing factor proline/glutamine-rich, MMS22L - mms22-like, dna repair protein, RAD51C - rad51 paralog c, RAD54L - rad54-like (s. cerevisiae), SFR1 - swi5-dependent recombination repair 1, BRCA1 - breast cancer 1, early onset, BLM - bloom syndrome, recq helicase-like, NSMCE1 - non-smc element 1 homolog (s. cerevisiae), TONSL - tonsoku-like, dna repair protein, GINS4 - gins complex subuni…
GO:0031323	regulation of cellular metabolic process	0.000276	0.0162	1.11	12306	4147	1756	656	[TRIB3 - tribbles homolog 3 (drosophila), PCGF5 - polycomb group ring finger 5, EXOSC9 - exosome component 9, PRRX1 - paired related homeobox 1, MAP3K8 - mitogen-activated protein kinase kinase kinase 8, AKAP12 - a kinase (prka) anchor protein 12, PATZ1 - poz (btb) and at hook containing zinc finger 1, LIF - leukemia inhibitory factor, IER2 - immediate early response 2, SPOCK1 - sparc/osteonectin…
GO:0007178	transmembrane receptor protein serine/threonine kinase signaling pathway	0.000296	0.0173	1.84	12306	126	1756	33	[LTBP4 - latent transforming growth factor beta binding protein 4, RGMB - rgm domain family, member b, ACVR2A - activin a receptor, type iia, F11R - f11 receptor, NKX2-5 - nk2 homeobox 5, GDF15 - growth differentiation factor 15, ITGB5 - integrin, beta 5, INHBA - inhibin, beta a, LTBP2 - latent transforming growth factor beta binding protein 2, ENG - endoglin, TGFBR1 - transforming growth factor,…
GO:0003148	outflow tract septum morphogenesis	0.000312	0.0182	3.08	12306	25	1756	11	[SEMA3C - sema domain, immunoglobulin domain (ig), short basic domain, secreted, (semaphorin) 3c, FGFR2 - fibroblast growth factor receptor 2, NRP2 - neuropilin 2, TGFB2 - transforming growth factor, beta 2, BMPR1A - bone morphogenetic protein receptor, type ia, NKX2-5 - nk2 homeobox 5, BMPR2 - bone morphogenetic protein receptor, type ii (serine/threonine kinase), SMAD6 - smad family member 6, Z…
GO:0051058	negative regulation of small GTPase mediated signal transduction	0.000317	0.0184	2.56	12306	41	1756	15	[ARHGAP42 - rho gtpase activating protein 42, MFN2 - mitofusin 2, SH3BP1 - sh3-domain binding protein 1, TIMP2 - timp metallopeptidase inhibitor 2, STMN1 - stathmin 1, TGFB2 - transforming growth factor, beta 2, SPRY1 - sprouty homolog 1, antagonist of fgf signaling (drosophila), SPRY2 - sprouty homolog 2 (drosophila), SLIT2 - slit homolog 2 (drosophila), CD2AP - cd2-associated protein, SYNGAP1 -…
GO:2000112	regulation of cellular macromolecule biosynthetic process	0.000325	0.0188	1.15	12306	2692	1756	440	[TRIB3 - tribbles homolog 3 (drosophila), PCGF5 - polycomb group ring finger 5, EXOSC9 - exosome component 9, PRRX1 - paired related homeobox 1, PATZ1 - poz (btb) and at hook containing zinc finger 1, LIF - leukemia inhibitory factor, IER2 - immediate early response 2, LIG3 - ligase iii, dna, atp-dependent, CHAF1B - chromatin assembly factor 1, subunit b (p60), LZTR1 - leucine-zipper-like transcr…
GO:0051174	regulation of phosphorus metabolic process	0.00033	0.019	1.23	12306	1290	1756	226	[TRIB3 - tribbles homolog 3 (drosophila), FAM83D - family with sequence similarity 83, member d, MAP3K8 - mitogen-activated protein kinase kinase kinase 8, AKAP12 - a kinase (prka) anchor protein 12, LIF - leukemia inhibitory factor, HES1 - hairy and enhancer of split 1, (drosophila), FARP1 - ferm, rhogef (arhgef) and pleckstrin domain protein 1 (chondrocyte-derived), ENG - endoglin, IQGAP3 - iq …
GO:0051310	metaphase plate congression	0.000333	0.0191	2.65	12306	37	1756	14	[C17orf104 - chromosome 17 open reading frame 104, KIF14 - kinesin family member 14, FAM83D - family with sequence similarity 83, member d, CENPE - centromere protein e, 312kda, CENPF - centromere protein f, 350/400kda, KIF18A - kinesin family member 18a, SPDL1 - spindle apparatus coiled-coil protein 1, NDC80 - ndc80 kinetochore complex component, KIF22 - kinesin family member 22, KIFC1 - kinesin…
GO:0065009	regulation of molecular function	0.000335	0.0191	1.16	12306	2400	1756	396	[TRIB3 - tribbles homolog 3 (drosophila), SH3BP1 - sh3-domain binding protein 1, ARHGEF39 - rho guanine nucleotide exchange factor (gef) 39, MAP3K8 - mitogen-activated protein kinase kinase kinase 8, LIF - leukemia inhibitory factor, SPOCK1 - sparc/osteonectin, cwcv and kazal-like domains proteoglycan (testican) 1, PLXNB1 - plexin b1, FAM13B - family with sequence similarity 13, member b, PLK1 - …
GO:0090287	regulation of cellular response to growth factor stimulus	0.000336	0.0191	1.64	12306	201	1756	47	[LTBP4 - latent transforming growth factor beta binding protein 4, FGFR2 - fibroblast growth factor receptor 2, RBPMS2 - rna binding protein with multiple splicing 2, GPR124 - g protein-coupled receptor 124, ADAMTS3 - adam metallopeptidase with thrombospondin type 1 motif, 3, ITGA8 - integrin, alpha 8, ACVR2A - activin a receptor, type iia, ASPN - asporin, SLIT2 - slit homolog 2 (drosophila), ITG…
GO:0007179	transforming growth factor beta receptor signaling pathway	0.000346	0.0196	2.16	12306	68	1756	21	[LTBP4 - latent transforming growth factor beta binding protein 4, TGFBR1 - transforming growth factor, beta receptor 1, ID1 - inhibitor of dna binding 1, dominant negative helix-loop-helix protein, TGFB2 - transforming growth factor, beta 2, TGFB3 - transforming growth factor, beta 3, TGFB1 - transforming growth factor, beta 1, SMAD1 - smad family member 1, SMAD2 - smad family member 2, F11R - f…
GO:0051172	negative regulation of nitrogen compound metabolic process	0.000359	0.0202	1.2	12306	1653	1756	282	[TRIB3 - tribbles homolog 3 (drosophila), PRRX1 - paired related homeobox 1, BRCA1 - breast cancer 1, early onset, NAF1 - nuclear assembly factor 1 ribonucleoprotein, LIF - leukemia inhibitory factor, PATZ1 - poz (btb) and at hook containing zinc finger 1, SPOCK1 - sparc/osteonectin, cwcv and kazal-like domains proteoglycan (testican) 1, ELK3 - elk3, ets-domain protein (srf accessory protein 2), …
GO:0045930	negative regulation of mitotic cell cycle	0.00036	0.0202	1.61	12306	218	1756	50	[C17orf104 - chromosome 17 open reading frame 104, ARID3A - at rich interactive domain 3a (bright-like), KANK2 - kn motif and ankyrin repeat domains 2, TIMP2 - timp metallopeptidase inhibitor 2, TRIM35 - tripartite motif containing 35, XPC - xeroderma pigmentosum, complementation group c, CDT1 - chromatin licensing and dna replication factor 1, BRCA1 - breast cancer 1, early onset, CDC25C - cell …
GO:0006275	regulation of DNA replication	0.00036	0.0201	1.95	12306	97	1756	27	[PDGFA - platelet-derived growth factor alpha polypeptide, CDC6 - cell division cycle 6, RFC4 - replication factor c (activator 1) 4, 37kda, RFC5 - replication factor c (activator 1) 5, 36.5kda, RFC2 - replication factor c (activator 1) 2, 40kda, SHC1 - shc (src homology 2 domain containing) transforming protein 1, RFC3 - replication factor c (activator 1) 3, 38kda, CDT1 - chromatin licensing and…
GO:0040011	locomotion	0.000369	0.0206	1.31	12306	720	1756	135	[GPR124 - g protein-coupled receptor 124, FAM83D - family with sequence similarity 83, member d, SH3BP1 - sh3-domain binding protein 1, F11R - f11 receptor, CDH2 - cadherin 2, type 1, n-cadherin (neuronal), LRRC16A - leucine rich repeat containing 16a, ANLN - anillin, actin binding protein, IER2 - immediate early response 2, SPOCK1 - sparc/osteonectin, cwcv and kazal-like domains proteoglycan (te…
GO:0010558	negative regulation of macromolecule biosynthetic process	0.000369	0.0205	1.26	12306	994	1756	179	[CDC6 - cell division cycle 6, TRIB3 - tribbles homolog 3 (drosophila), KANK2 - kn motif and ankyrin repeat domains 2, BIRC5 - baculoviral iap repeat containing 5, PRRX1 - paired related homeobox 1, PAWR - prkc, apoptosis, wt1, regulator, WWC3 - wwc family member 3, KLF12 - kruppel-like factor 12, BRCA1 - breast cancer 1, early onset, SIN3A - sin3 transcription regulator family member a, ENC1 - e…
GO:0048762	mesenchymal cell differentiation	0.000371	0.0205	2.11	12306	73	1756	22	[TGFBR1 - transforming growth factor, beta receptor 1, FGFR2 - fibroblast growth factor receptor 2, FAM83D - family with sequence similarity 83, member d, TGFB2 - transforming growth factor, beta 2, TCOF1 - treacher collins-franceschetti syndrome 1, OSR1 - odd-skipped related 1 (drosophila), TGFB1 - transforming growth factor, beta 1, S100A4 - s100 calcium binding protein a4, SPRY1 - sprouty homo…
GO:1902749	regulation of cell cycle G2/M phase transition	0.000382	0.021	1.72	12306	159	1756	39	[KIF14 - kinesin family member 14, CDC25A - cell division cycle 25a, CDK5RAP2 - cdk5 regulatory subunit associated protein 2, NEK2 - nima-related kinase 2, PKIA - protein kinase (camp-dependent, catalytic) inhibitor alpha, RAD51C - rad51 paralog c, CENPF - centromere protein f, 350/400kda, BRCA1 - breast cancer 1, early onset, HAUS3 - haus augmin-like complex, subunit 3, SIN3A - sin3 transcriptio…
GO:0051240	positive regulation of multicellular organismal process	0.000385	0.0211	1.24	12306	1153	1756	204	[KIF20B - kinesin family member 20b, TNFRSF12A - tumor necrosis factor receptor superfamily, member 12a, BRCA1 - breast cancer 1, early onset, GORAB - golgin, rab6-interacting, LIF - leukemia inhibitory factor, TICAM1 - toll-like receptor adaptor molecule 1, HES1 - hairy and enhancer of split 1, (drosophila), PLXNB1 - plexin b1, NRP2 - neuropilin 2, ZFP36L1 - zfp36 ring finger protein-like 1, ENG…
GO:0010631	epithelial cell migration	0.000399	0.0218	2.19	12306	64	1756	20	[TGFBR1 - transforming growth factor, beta receptor 1, GPR124 - g protein-coupled receptor 124, ID1 - inhibitor of dna binding 1, dominant negative helix-loop-helix protein, VEGFA - vascular endothelial growth factor a, SLIT2 - slit homolog 2 (drosophila), GPX1 - glutathione peroxidase 1, ANLN - anillin, actin binding protein, MYH9 - myosin, heavy chain 9, non-muscle, PTPN11 - protein tyrosine ph…
GO:1902903	regulation of supramolecular fiber organization	0.0004	0.0218	1.58	12306	230	1756	52	[FHOD3 - formin homology 2 domain containing 3, PHLDB2 - pleckstrin homology-like domain, family b, member 2, SH3BP1 - sh3-domain binding protein 1, EML2 - echinoderm microtubule associated protein like 2, CAPG - capping protein (actin filament), gelsolin-like, SPIRE1 - spire actin nucleation factor 1, SLC9A1 - solute carrier family 9, subfamily a (nhe1, cation proton antiporter 1), member 1, PFN…
GO:0032388	positive regulation of intracellular transport	0.000404	0.0219	1.55	12306	258	1756	57	[BOK - bcl2-related ovarian killer, KIF20B - kinesin family member 20b, CDH1 - cadherin 1, type 1, e-cadherin (epithelial), CDH3 - cadherin 3, type 1, p-cadherin (placental), GTSE1 - g-2 and s-phase expressed 1, HES1 - hairy and enhancer of split 1, (drosophila), CASP8 - caspase 8, apoptosis-related cysteine peptidase, PTPN23 - protein tyrosine phosphatase, non-receptor type 23, ABLIM3 - actin bi…
GO:0051960	regulation of nervous system development	0.00041	0.0222	1.33	12306	642	1756	122	[PDLIM5 - pdz and lim domain 5, CDC20 - cell division cycle 20, PRRX1 - paired related homeobox 1, KIF20B - kinesin family member 20b, TNFRSF12A - tumor necrosis factor receptor superfamily, member 12a, GORAB - golgin, rab6-interacting, CDH2 - cadherin 2, type 1, n-cadherin (neuronal), TCF12 - transcription factor 12, LIF - leukemia inhibitory factor, ENC1 - ectodermal-neural cortex 1 (with btb d…
GO:1901989	positive regulation of cell cycle phase transition	0.00041	0.0221	2.29	12306	55	1756	18	[CDC6 - cell division cycle 6, FAM83D - family with sequence similarity 83, member d, CDC25A - cell division cycle 25a, SMARCD3 - swi/snf related, matrix associated, actin dependent regulator of chromatin, subfamily d, member 3, TGFB1 - transforming growth factor, beta 1, UBE2C - ubiquitin-conjugating enzyme e2c, RAD51C - rad51 paralog c, CDT1 - chromatin licensing and dna replication factor 1, C…
GO:0061009	common bile duct development	0.000413	0.0222	7.01	12306	4	1756	4	[HES1 - hairy and enhancer of split 1, (drosophila), SOX9 - sry (sex determining region y)-box 9, HHEX - hematopoietically expressed homeobox, MKS1 - meckel syndrome, type 1]
GO:0001933	negative regulation of protein phosphorylation	0.000422	0.0225	1.48	12306	321	1756	68	[TRIB3 - tribbles homolog 3 (drosophila), CEP85 - centrosomal protein 85kda, TIMP3 - timp metallopeptidase inhibitor 3, PKIA - protein kinase (camp-dependent, catalytic) inhibitor alpha, LIF - leukemia inhibitory factor, PTPRJ - protein tyrosine phosphatase, receptor type, j, LRRC15 - leucine rich repeat containing 15, FOXM1 - forkhead box m1, TLR4 - toll-like receptor 4, DBNDD2 - dysbindin (dyst…
GO:0008608	attachment of spindle microtubules to kinetochore	0.000426	0.0227	3.74	12306	15	1756	8	[DSN1 - dsn1, mis12 kinetochore complex component, CENPC - centromere protein c, CENPE - centromere protein e, 312kda, KIF2C - kinesin family member 2c, SGOL1 - shugoshin-like 1 (s. pombe), CDT1 - chromatin licensing and dna replication factor 1, NDC80 - ndc80 kinetochore complex component, CASC5 - cancer susceptibility candidate 5]
GO:0031577	spindle checkpoint	0.000426	0.0226	3.74	12306	15	1756	8	[BUB1 - bub1 mitotic checkpoint serine/threonine kinase, PLK1 - polo-like kinase 1, BUB1B - bub1 mitotic checkpoint serine/threonine kinase b, MAD2L1 - mad2 mitotic arrest deficient-like 1 (yeast), CENPF - centromere protein f, 350/400kda, KLHL22 - kelch-like family member 22, SPDL1 - spindle apparatus coiled-coil protein 1, TTK - ttk protein kinase]
GO:0040036	regulation of fibroblast growth factor receptor signaling pathway	0.000427	0.0226	3.19	12306	22	1756	10	[SULF2 - sulfatase 2, FGFR2 - fibroblast growth factor receptor 2, SHISA2 - shisa family member 2, GPC1 - glypican 1, THBS1 - thrombospondin 1, DUSP6 - dual specificity phosphatase 6, SPRY1 - sprouty homolog 1, antagonist of fgf signaling (drosophila), SPRY2 - sprouty homolog 2 (drosophila), RUNX2 - runt-related transcription factor 2, CTNNB1 - catenin (cadherin-associated protein), beta 1, 88kda]
GO:0014032	neural crest cell development	0.000427	0.0225	3.19	12306	22	1756	10	[HES1 - hairy and enhancer of split 1, (drosophila), EDNRA - endothelin receptor type a, NRG1 - neuregulin 1, TCOF1 - treacher collins-franceschetti syndrome 1, FOXC2 - forkhead box c2 (mfh-1, mesenchyme forkhead 1), EDN1 - endothelin 1, SOX11 - sry (sex determining region y)-box 11, BMPR1A - bone morphogenetic protein receptor, type ia, SOX9 - sry (sex determining region y)-box 9, PEF1 - penta-e…
GO:0006357	regulation of transcription from RNA polymerase II promoter	0.00043	0.0226	1.21	12306	1476	1756	254	[TRIB3 - tribbles homolog 3 (drosophila), PCGF5 - polycomb group ring finger 5, EXOSC9 - exosome component 9, PRRX1 - paired related homeobox 1, BRCA1 - breast cancer 1, early onset, RFX2 - regulatory factor x, 2 (influences hla class ii expression), LIF - leukemia inhibitory factor, PATZ1 - poz (btb) and at hook containing zinc finger 1, IER2 - immediate early response 2, ELK3 - elk3, ets-domain…
GO:0051336	regulation of hydrolase activity	0.000431	0.0225	1.26	12306	997	1756	179	[RGS19 - regulator of g-protein signaling 19, BOK - bcl2-related ovarian killer, SH3BP1 - sh3-domain binding protein 1, BIRC5 - baculoviral iap repeat containing 5, ARHGEF39 - rho guanine nucleotide exchange factor (gef) 39, F11R - f11 receptor, SPOCK1 - sparc/osteonectin, cwcv and kazal-like domains proteoglycan (testican) 1, RACGAP1 - rac gtpase activating protein 1, RANGRF - ran guanine nucleo…
GO:0009966	regulation of signal transduction	0.000453	0.0236	1.16	12306	2296	1756	379	[RGS19 - regulator of g-protein signaling 19, BOK - bcl2-related ovarian killer, TRIB3 - tribbles homolog 3 (drosophila), FAM83D - family with sequence similarity 83, member d, RFC4 - replication factor c (activator 1) 4, 37kda, RFC5 - replication factor c (activator 1) 5, 36.5kda, SH3BP1 - sh3-domain binding protein 1, RFC2 - replication factor c (activator 1) 2, 40kda, RFC3 - replication factor…
GO:0035735	intraciliary transport involved in cilium assembly	0.000459	0.0238	2.58	12306	38	1756	14	[DYNLRB2 - dynein, light chain, roadblock-type 2, WDR60 - wd repeat domain 60, CLUAP1 - clusterin associated protein 1, KIFAP3 - kinesin-associated protein 3, PCM1 - pericentriolar material 1, WDR19 - wd repeat domain 19, IFT27 - intraflagellar transport 27 homolog (chlamydomonas), IFT57 - intraflagellar transport 57 homolog (chlamydomonas), IFT46 - intraflagellar transport 46 homolog (chlamydomo…
GO:0007098	centrosome cycle	0.000472	0.0244	2.96	12306	26	1756	11	[SDCCAG8 - serologically defined colon cancer antigen 8, PLK1 - polo-like kinase 1, CDK5RAP2 - cdk5 regulatory subunit associated protein 2, FES - feline sarcoma oncogene, KIAA0101 - kiaa0101, PCM1 - pericentriolar material 1, PPP1R12A - protein phosphatase 1, regulatory subunit 12a, CEP68 - centrosomal protein 68kda, HAUS3 - haus augmin-like complex, subunit 3, BRCA1 - breast cancer 1, early ons…
GO:0043009	chordate embryonic development	0.000474	0.0244	1.73	12306	150	1756	37	[PKD1 - polycystic kidney disease 1 (autosomal dominant), FGFR2 - fibroblast growth factor receptor 2, CCNB2 - cyclin b2, WDR19 - wd repeat domain 19, BRCA1 - breast cancer 1, early onset, ETNK2 - ethanolamine kinase 2, SEC24D - sec24 family, member d (s. cerevisiae), KLF2 - kruppel-like factor 2 (lung), SIN3A - sin3 transcription regulator family member a, MYH9 - myosin, heavy chain 9, non-muscl…
GO:0043087	regulation of GTPase activity	0.000475	0.0244	1.36	12306	535	1756	104	[RGS19 - regulator of g-protein signaling 19, SH3BP1 - sh3-domain binding protein 1, ARHGEF39 - rho guanine nucleotide exchange factor (gef) 39, F11R - f11 receptor, RACGAP1 - rac gtpase activating protein 1, RANGRF - ran guanine nucleotide release factor, PLXNB1 - plexin b1, FAM13B - family with sequence similarity 13, member b, CYTH1 - cytohesin 1, FARP1 - ferm, rhogef (arhgef) and pleckstrin d…
GO:0034501	protein localization to kinetochore	0.000477	0.0244	4.67	12306	9	1756	6	[BUB1B - bub1 mitotic checkpoint serine/threonine kinase b, CENPT - centromere protein t, MTBP - mdm2, transformed 3t3 cell double minute 2, p53 binding protein (mouse) binding protein, 104kda, SPDL1 - spindle apparatus coiled-coil protein 1, TTK - ttk protein kinase, CASC5 - cancer susceptibility candidate 5]
GO:0033683	nucleotide-excision repair, DNA incision	0.000487	0.0249	2.8	12306	30	1756	12	[PARP1 - poly (adp-ribose) polymerase 1, PCNA - proliferating cell nuclear antigen, RFC4 - replication factor c (activator 1) 4, 37kda, POLD4 - polymerase (dna-directed), delta 4, accessory subunit, RFC5 - replication factor c (activator 1) 5, 36.5kda, POLD2 - polymerase (dna directed), delta 2, accessory subunit, RFC2 - replication factor c (activator 1) 2, 40kda, RFC3 - replication factor c (ac…
GO:0071459	protein localization to chromosome, centromeric region	0.000487	0.0248	4.09	12306	12	1756	7	[CENPA - centromere protein a, BUB1B - bub1 mitotic checkpoint serine/threonine kinase b, CENPT - centromere protein t, MTBP - mdm2, transformed 3t3 cell double minute 2, p53 binding protein (mouse) binding protein, 104kda, SPDL1 - spindle apparatus coiled-coil protein 1, TTK - ttk protein kinase, CASC5 - cancer susceptibility candidate 5]
GO:0031401	positive regulation of protein modification process	0.000492	0.0249	1.27	12306	899	1756	163	[CDC6 - cell division cycle 6, TRIB3 - tribbles homolog 3 (drosophila), CDC20 - cell division cycle 20, S1PR2 - sphingosine-1-phosphate receptor 2, MAP3K8 - mitogen-activated protein kinase kinase kinase 8, FLT4 - fms-related tyrosine kinase 4, BRCA1 - breast cancer 1, early onset, CDH2 - cadherin 2, type 1, n-cadherin (neuronal), LIF - leukemia inhibitory factor, TICAM1 - toll-like receptor adap…
GO:0051640	organelle localization	0.000493	0.0249	1.44	12306	375	1756	77	[C17orf104 - chromosome 17 open reading frame 104, FAM83D - family with sequence similarity 83, member d, CDK5RAP2 - cdk5 regulatory subunit associated protein 2, KIFAP3 - kinesin-associated protein 3, CEP89 - centrosomal protein 89kda, SPIRE1 - spire actin nucleation factor 1, HAUS3 - haus augmin-like complex, subunit 3, SPDL1 - spindle apparatus coiled-coil protein 1, SYT1 - synaptotagmin i, SA…
GO:0051270	regulation of cellular component movement	0.000499	0.0251	1.33	12306	639	1756	121	[GPR124 - g protein-coupled receptor 124, PHLDB2 - pleckstrin homology-like domain, family b, member 2, SH3BP1 - sh3-domain binding protein 1, ARHGEF39 - rho guanine nucleotide exchange factor (gef) 39, KIF20B - kinesin family member 20b, FLT4 - fms-related tyrosine kinase 4, LRRC16A - leucine rich repeat containing 16a, PODXL - podocalyxin-like, NRP2 - neuropilin 2, PTPN23 - protein tyrosine pho…
GO:0007093	mitotic cell cycle checkpoint	0.000501	0.0251	2.16	12306	65	1756	20	[BUB1 - bub1 mitotic checkpoint serine/threonine kinase, BUB1B - bub1 mitotic checkpoint serine/threonine kinase b, PLK1 - polo-like kinase 1, MAD2L1 - mad2 mitotic arrest deficient-like 1 (yeast), TGFB1 - transforming growth factor, beta 1, XPC - xeroderma pigmentosum, complementation group c, CENPF - centromere protein f, 350/400kda, KLHL22 - kelch-like family member 22, BRCA1 - breast cancer 1…
GO:0040007	growth	0.000511	0.0255	1.51	12306	283	1756	61	[EMP1 - epithelial membrane protein 1, PDLIM5 - pdz and lim domain 5, CCNB2 - cyclin b2, SLC9A1 - solute carrier family 9, subfamily a (nhe1, cation proton antiporter 1), member 1, PLXNB1 - plexin b1, NRP2 - neuropilin 2, ZFP36L1 - zfp36 ring finger protein-like 1, MAP1B - microtubule-associated protein 1b, COBL - cordon-bleu wh2 repeat protein, CTNNB1 - catenin (cadherin-associated protein), bet…
GO:2000113	negative regulation of cellular macromolecule biosynthetic process	0.000512	0.0255	1.26	12306	950	1756	171	[CDC6 - cell division cycle 6, TRIB3 - tribbles homolog 3 (drosophila), KANK2 - kn motif and ankyrin repeat domains 2, BIRC5 - baculoviral iap repeat containing 5, PRRX1 - paired related homeobox 1, PAWR - prkc, apoptosis, wt1, regulator, WWC3 - wwc family member 3, KLF12 - kruppel-like factor 12, BRCA1 - breast cancer 1, early onset, SIN3A - sin3 transcription regulator family member a, ENC1 - e…
GO:0001934	positive regulation of protein phosphorylation	0.000518	0.0257	1.31	12306	701	1756	131	[CDC6 - cell division cycle 6, S1PR2 - sphingosine-1-phosphate receptor 2, MAP3K8 - mitogen-activated protein kinase kinase kinase 8, FLT4 - fms-related tyrosine kinase 4, CDH2 - cadherin 2, type 1, n-cadherin (neuronal), LIF - leukemia inhibitory factor, HES1 - hairy and enhancer of split 1, (drosophila), INHBA - inhibin, beta a, CDON - cell adhesion associated, oncogene regulated, GLIPR2 - gli …
GO:0010948	negative regulation of cell cycle process	0.000537	0.0265	1.61	12306	205	1756	47	[PKD2 - polycystic kidney disease 2 (autosomal dominant), ARID3A - at rich interactive domain 3a (bright-like), KANK2 - kn motif and ankyrin repeat domains 2, CDK5RAP2 - cdk5 regulatory subunit associated protein 2, NEK2 - nima-related kinase 2, CTDSPL - ctd (carboxy-terminal domain, rna polymerase ii, polypeptide a) small phosphatase-like, CCNF - cyclin f, CENPF - centromere protein f, 350/400kd…
GO:0080135	regulation of cellular response to stress	0.00055	0.0271	1.38	12306	483	1756	95	[BOK - bcl2-related ovarian killer, PAWR - prkc, apoptosis, wt1, regulator, PRRX1 - paired related homeobox 1, WDR76 - wd repeat domain 76, FLT4 - fms-related tyrosine kinase 4, BRCA1 - breast cancer 1, early onset, CAMK2G - calcium/calmodulin-dependent protein kinase ii gamma, CAMK2D - calcium/calmodulin-dependent protein kinase ii delta, USP1 - ubiquitin specific peptidase 1, CTGF - connective …
GO:0000132	establishment of mitotic spindle orientation	0.000572	0.0281	3.32	12306	19	1756	9	[EYA1 - eyes absent homolog 1 (drosophila), CENPA - centromere protein a, CDK5RAP2 - cdk5 regulatory subunit associated protein 2, GPSM2 - g-protein signaling modulator 2, SPRY1 - sprouty homolog 1, antagonist of fgf signaling (drosophila), SPRY2 - sprouty homolog 2 (drosophila), SPDL1 - spindle apparatus coiled-coil protein 1, NDC80 - ndc80 kinetochore complex component, SAPCD2 - suppressor apc …
GO:0000724	double-strand break repair via homologous recombination	0.000579	0.0283	2.18	12306	61	1756	19	[SFPQ - splicing factor proline/glutamine-rich, MMS22L - mms22-like, dna repair protein, RAD51C - rad51 paralog c, RAD54L - rad54-like (s. cerevisiae), SFR1 - swi5-dependent recombination repair 1, BRCA1 - breast cancer 1, early onset, BLM - bloom syndrome, recq helicase-like, NSMCE1 - non-smc element 1 homolog (s. cerevisiae), TONSL - tonsoku-like, dna repair protein, GINS4 - gins complex subuni…
GO:0048468	cell development	0.00059	0.0288	1.37	12306	496	1756	97	[TCOF1 - treacher collins-franceschetti syndrome 1, F11R - f11 receptor, PVRL3 - poliovirus receptor-related 3, RFX2 - regulatory factor x, 2 (influences hla class ii expression), LIF - leukemia inhibitory factor, PODXL - podocalyxin-like, HES1 - hairy and enhancer of split 1, (drosophila), PBX3 - pre-b-cell leukemia homeobox 3, INHBA - inhibin, beta a, FLI1 - fli-1 proto-oncogene, ets transcript…
GO:0002761	regulation of myeloid leukocyte differentiation	0.000596	0.029	1.98	12306	85	1756	24	[CDK6 - cyclin-dependent kinase 6, CSF1 - colony stimulating factor 1 (macrophage), IL34 - interleukin 34, TRIB1 - tribbles homolog 1 (drosophila), LIF - leukemia inhibitory factor, RUNX1 - runt-related transcription factor 1, INHBA - inhibin, beta a, ZBTB46 - zinc finger and btb domain containing 46, CASP8 - caspase 8, apoptosis-related cysteine peptidase, RASSF2 - ras association (ralgds/af-6) …
GO:0009792	embryo development ending in birth or egg hatching	0.000622	0.0301	1.71	12306	152	1756	37	[PKD1 - polycystic kidney disease 1 (autosomal dominant), FGFR2 - fibroblast growth factor receptor 2, CCNB2 - cyclin b2, WDR19 - wd repeat domain 19, BRCA1 - breast cancer 1, early onset, ETNK2 - ethanolamine kinase 2, SEC24D - sec24 family, member d (s. cerevisiae), KLF2 - kruppel-like factor 2 (lung), SIN3A - sin3 transcription regulator family member a, MYH9 - myosin, heavy chain 9, non-muscl…
GO:0090329	regulation of DNA-dependent DNA replication	0.000623	0.0301	2.52	12306	39	1756	14	[RFC4 - replication factor c (activator 1) 4, 37kda, RFC5 - replication factor c (activator 1) 5, 36.5kda, RFC2 - replication factor c (activator 1) 2, 40kda, RFC3 - replication factor c (activator 1) 3, 38kda, CHTF18 - ctf18, chromosome transmission fidelity factor 18 homolog (s. cerevisiae), CDT1 - chromatin licensing and dna replication factor 1, BLM - bloom syndrome, recq helicase-like, SMC3 …
GO:0045597	positive regulation of cell differentiation	0.000625	0.0301	1.31	12306	698	1756	130	[S1PR2 - sphingosine-1-phosphate receptor 2, KIF20B - kinesin family member 20b, TNFRSF12A - tumor necrosis factor receptor superfamily, member 12a, TCF12 - transcription factor 12, CDH2 - cadherin 2, type 1, n-cadherin (neuronal), LRRC16A - leucine rich repeat containing 16a, ENC1 - ectodermal-neural cortex 1 (with btb domain), LIF - leukemia inhibitory factor, HES1 - hairy and enhancer of split…
GO:0031326	regulation of cellular biosynthetic process	0.000644	0.0309	1.13	12306	2921	1756	471	[TRIB3 - tribbles homolog 3 (drosophila), PCGF5 - polycomb group ring finger 5, EXOSC9 - exosome component 9, PRRX1 - paired related homeobox 1, PATZ1 - poz (btb) and at hook containing zinc finger 1, AKAP12 - a kinase (prka) anchor protein 12, LIF - leukemia inhibitory factor, IER2 - immediate early response 2, LIG3 - ligase iii, dna, atp-dependent, CHAF1B - chromatin assembly factor 1, subunit …
GO:0048514	blood vessel morphogenesis	0.000659	0.0315	2.07	12306	71	1756	21	[TGFBR1 - transforming growth factor, beta receptor 1, PKD2 - polycystic kidney disease 2 (autosomal dominant), ID1 - inhibitor of dna binding 1, dominant negative helix-loop-helix protein, VEGFA - vascular endothelial growth factor a, TGFB2 - transforming growth factor, beta 2, FOXC2 - forkhead box c2 (mfh-1, mesenchyme forkhead 1), PRRX1 - paired related homeobox 1, GJA5 - gap junction protein,…
GO:0002040	sprouting angiogenesis	0.000659	0.0314	3.05	12306	23	1756	10	[ANGPT1 - angiopoietin 1, GPR124 - g protein-coupled receptor 124, PTK2B - protein tyrosine kinase 2 beta, THBS1 - thrombospondin 1, ESM1 - endothelial cell-specific molecule 1, CDH13 - cadherin 13, h-cadherin (heart), LEF1 - lymphoid enhancer-binding factor 1, FLT4 - fms-related tyrosine kinase 4, JMJD6 - jumonji domain containing 6, E2F8 - e2f transcription factor 8]
GO:0060411	cardiac septum morphogenesis	0.000667	0.0316	2.21	12306	57	1756	18	[TGFBR1 - transforming growth factor, beta receptor 1, FGFR2 - fibroblast growth factor receptor 2, TGFB2 - transforming growth factor, beta 2, SOX11 - sry (sex determining region y)-box 11, WHSC1 - wolf-hirschhorn syndrome candidate 1, NKX2-5 - nk2 homeobox 5, GJA5 - gap junction protein, alpha 5, 40kda, HES1 - hairy and enhancer of split 1, (drosophila), SEMA3C - sema domain, immunoglobulin dom…
GO:0051225	spindle assembly	0.000675	0.0319	2.34	12306	48	1756	16	[CDC20 - cell division cycle 20, BIRC5 - baculoviral iap repeat containing 5, NEK2 - nima-related kinase 2, RCC1 - regulator of chromosome condensation 1, TUBGCP5 - tubulin, gamma complex associated protein 5, HAUS3 - haus augmin-like complex, subunit 3, CEP192 - centrosomal protein 192kda, MAP9 - microtubule-associated protein 9, MYBL2 - v-myb avian myeloblastosis viral oncogene homolog-like 2, …
GO:1904591	positive regulation of protein import	0.000686	0.0323	2.03	12306	76	1756	22	[EFCAB7 - ef-hand calcium binding domain 7, TGFBR1 - transforming growth factor, beta receptor 1, ARHGEF5 - rho guanine nucleotide exchange factor (gef) 5, RBPMS - rna binding protein with multiple splicing, SFRP2 - secreted frizzled-related protein 2, TGFB3 - transforming growth factor, beta 3, TGFB1 - transforming growth factor, beta 1, CDH1 - cadherin 1, type 1, e-cadherin (epithelial), BAMBI …
GO:1903507	negative regulation of nucleic acid-templated transcription	0.000691	0.0325	1.28	12306	824	1756	150	[TRIB3 - tribbles homolog 3 (drosophila), KANK2 - kn motif and ankyrin repeat domains 2, BIRC5 - baculoviral iap repeat containing 5, PRRX1 - paired related homeobox 1, PAWR - prkc, apoptosis, wt1, regulator, WWC3 - wwc family member 3, KLF12 - kruppel-like factor 12, BRCA1 - breast cancer 1, early onset, PATZ1 - poz (btb) and at hook containing zinc finger 1, SIN3A - sin3 transcription regulator…
GO:0046824	positive regulation of nucleocytoplasmic transport	0.000723	0.0339	1.93	12306	91	1756	25	[RBPMS - rna binding protein with multiple splicing, CDH1 - cadherin 1, type 1, e-cadherin (epithelial), ANP32B - acidic (leucine-rich) nuclear phosphoprotein 32 family, member b, GTSE1 - g-2 and s-phase expressed 1, TP53 - tumor protein p53, SEMA5A - sema domain, seven thrombospondin repeats (type 1 and type 1-like), transmembrane domain (tm) and short cytoplasmic domain, (semaphorin) 5a, GLI3 -…
GO:0045892	negative regulation of transcription, DNA-templated	0.000728	0.034	1.28	12306	800	1756	146	[TRIB3 - tribbles homolog 3 (drosophila), KANK2 - kn motif and ankyrin repeat domains 2, BIRC5 - baculoviral iap repeat containing 5, PRRX1 - paired related homeobox 1, PAWR - prkc, apoptosis, wt1, regulator, WWC3 - wwc family member 3, KLF12 - kruppel-like factor 12, BRCA1 - breast cancer 1, early onset, PATZ1 - poz (btb) and at hook containing zinc finger 1, SIN3A - sin3 transcription regulator…
GO:1902679	negative regulation of RNA biosynthetic process	0.000729	0.0339	1.27	12306	825	1756	150	[TRIB3 - tribbles homolog 3 (drosophila), KANK2 - kn motif and ankyrin repeat domains 2, BIRC5 - baculoviral iap repeat containing 5, PRRX1 - paired related homeobox 1, PAWR - prkc, apoptosis, wt1, regulator, WWC3 - wwc family member 3, KLF12 - kruppel-like factor 12, BRCA1 - breast cancer 1, early onset, PATZ1 - poz (btb) and at hook containing zinc finger 1, SIN3A - sin3 transcription regulator…
GO:0044089	positive regulation of cellular component biogenesis	0.000734	0.034	1.42	12306	374	1756	76	[PHLDB2 - pleckstrin homology-like domain, family b, member 2, NKX2-5 - nk2 homeobox 5, SPIRE1 - spire actin nucleation factor 1, PFN2 - profilin 2, LRRN3 - leucine rich repeat neuronal 3, CDT1 - chromatin licensing and dna replication factor 1, LRRC16A - leucine rich repeat containing 16a, PTPRJ - protein tyrosine phosphatase, receptor type, j, ANLN - anillin, actin binding protein, ABI2 - abl-i…
GO:0071498	cellular response to fluid shear stress	0.000746	0.0345	3.5	12306	16	1756	8	[PKD2 - polycystic kidney disease 2 (autosomal dominant), PTK2B - protein tyrosine kinase 2 beta, SRC - v-src avian sarcoma (schmidt-ruppin a-2) viral oncogene homolog, SOCS5 - suppressor of cytokine signaling 5, PTGS2 - prostaglandin-endoperoxide synthase 2 (prostaglandin g/h synthase and cyclooxygenase), ASS1 - argininosuccinate synthase 1, KLF2 - kruppel-like factor 2 (lung), KLF4 - kruppel-li…
GO:0048584	positive regulation of response to stimulus	0.000765	0.0353	1.2	12306	1477	1756	252	[BOK - bcl2-related ovarian killer, PRRX1 - paired related homeobox 1, TNFRSF12A - tumor necrosis factor receptor superfamily, member 12a, MAP3K8 - mitogen-activated protein kinase kinase kinase 8, BRCA1 - breast cancer 1, early onset, GORAB - golgin, rab6-interacting, AKAP12 - a kinase (prka) anchor protein 12, LIF - leukemia inhibitory factor, TICAM1 - toll-like receptor adaptor molecule 1, HES…
GO:0006282	regulation of DNA repair	0.000771	0.0354	2.09	12306	67	1756	20	[PCNA - proliferating cell nuclear antigen, RIF1 - rap1 interacting factor homolog (yeast), CHEK1 - checkpoint kinase 1, NUDT16L1 - nudix (nucleoside diphosphate linked moiety x)-type motif 16-like 1, WHSC1 - wolf-hirschhorn syndrome candidate 1, BRCA1 - breast cancer 1, early onset, HELB - helicase (dna) b, PARPBP - parp1 binding protein, RAD52 - rad52 homolog (s. cerevisiae), TIMELESS - timeles…
GO:0048646	anatomical structure formation involved in morphogenesis	0.000796	0.0365	1.33	12306	567	1756	108	[GPR124 - g protein-coupled receptor 124, TCOF1 - treacher collins-franceschetti syndrome 1, KIF20B - kinesin family member 20b, TNFRSF12A - tumor necrosis factor receptor superfamily, member 12a, FLT4 - fms-related tyrosine kinase 4, RFX2 - regulatory factor x, 2 (influences hla class ii expression), ELK3 - elk3, ets-domain protein (srf accessory protein 2), PODXL - podocalyxin-like, MKS1 - meck…
GO:0009790	embryo development	0.0008	0.0365	1.63	12306	181	1756	42	[PKD1 - polycystic kidney disease 1 (autosomal dominant), FGFR2 - fibroblast growth factor receptor 2, CCNB2 - cyclin b2, WDR19 - wd repeat domain 19, BRCA1 - breast cancer 1, early onset, ETNK2 - ethanolamine kinase 2, SEC24D - sec24 family, member d (s. cerevisiae), KLF2 - kruppel-like factor 2 (lung), SIN3A - sin3 transcription regulator family member a, MYH9 - myosin, heavy chain 9, non-muscl…
GO:0051347	positive regulation of transferase activity	0.000814	0.037	1.34	12306	543	1756	104	[TRIB3 - tribbles homolog 3 (drosophila), CDC6 - cell division cycle 6, RFC4 - replication factor c (activator 1) 4, 37kda, DUSP12 - dual specificity phosphatase 12, RFC5 - replication factor c (activator 1) 5, 36.5kda, CDC20 - cell division cycle 20, S1PR2 - sphingosine-1-phosphate receptor 2, RFC2 - replication factor c (activator 1) 2, 40kda, RFC3 - replication factor c (activator 1) 3, 38kda,…
GO:0010638	positive regulation of organelle organization	0.00084	0.0381	1.36	12306	483	1756	94	[BOK - bcl2-related ovarian killer, PHF19 - phd finger protein 19, SPIRE1 - spire actin nucleation factor 1, PFN2 - profilin 2, BRCA1 - breast cancer 1, early onset, CDT1 - chromatin licensing and dna replication factor 1, NAF1 - nuclear assembly factor 1 ribonucleoprotein, LRRC16A - leucine rich repeat containing 16a, SIN3A - sin3 transcription regulator family member a, LIF - leukemia inhibitor…
GO:0003006	developmental process involved in reproduction	0.000842	0.0381	1.38	12306	453	1756	89	[BOK - bcl2-related ovarian killer, C17orf104 - chromosome 17 open reading frame 104, KLHL26 - kelch-like family member 26, WDR19 - wd repeat domain 19, PVRL3 - poliovirus receptor-related 3, HMGB2 - high mobility group box 2, FANCA - fanconi anemia, complementation group a, LIF - leukemia inhibitory factor, PATZ1 - poz (btb) and at hook containing zinc finger 1, TFEB - transcription factor eb, R…
GO:0007015	actin filament organization	0.000847	0.0382	1.69	12306	149	1756	36	[FHOD3 - formin homology 2 domain containing 3, ACTN1 - actinin, alpha 1, SH3BP1 - sh3-domain binding protein 1, PAWR - prkc, apoptosis, wt1, regulator, MYO1B - myosin ib, ACTN4 - actinin, alpha 4, BAIAP2L1 - bai1-associated protein 2-like 1, SPIRE1 - spire actin nucleation factor 1, NCK2 - nck adaptor protein 2, LRRC16A - leucine rich repeat containing 16a, CD2AP - cd2-associated protein, FSCN1 …
GO:0045667	regulation of osteoblast differentiation	0.00085	0.0382	1.97	12306	82	1756	23	[CDK6 - cyclin-dependent kinase 6, FGFR2 - fibroblast growth factor receptor 2, SFRP2 - secreted frizzled-related protein 2, ID1 - inhibitor of dna binding 1, dominant negative helix-loop-helix protein, SMAD1 - smad family member 1, CTHRC1 - collagen triple helix repeat containing 1, SOX11 - sry (sex determining region y)-box 11, LIMD1 - lim domains containing 1, ACVR2A - activin a receptor, type…
GO:0060560	developmental growth involved in morphogenesis	0.00085	0.0381	1.97	12306	82	1756	23	[FGFR2 - fibroblast growth factor receptor 2, CSF1 - colony stimulating factor 1 (macrophage), BDNF - brain-derived neurotrophic factor, TGFB1 - transforming growth factor, beta 1, SEMA3A - sema domain, immunoglobulin domain (ig), short basic domain, secreted, (semaphorin) 3a, SPRY1 - sprouty homolog 1, antagonist of fgf signaling (drosophila), SLIT3 - slit homolog 3 (drosophila), SPRY2 - sprouty…
GO:0060393	regulation of pathway-restricted SMAD protein phosphorylation	0.000871	0.0389	2.29	12306	49	1756	16	[TGFBR1 - transforming growth factor, beta receptor 1, RBPMS - rna binding protein with multiple splicing, TGFB2 - transforming growth factor, beta 2, TGFB3 - transforming growth factor, beta 3, TGFB1 - transforming growth factor, beta 1, ACVR2A - activin a receptor, type iia, GDF15 - growth differentiation factor 15, TTK - ttk protein kinase, INHBA - inhibin, beta a, GREM1 - gremlin 1, dan famil…
GO:2000027	regulation of organ morphogenesis	0.000878	0.0391	1.56	12306	215	1756	48	[PDGFA - platelet-derived growth factor alpha polypeptide, FGFR2 - fibroblast growth factor receptor 2, ASPN - asporin, NUMB - numb homolog (drosophila), LIF - leukemia inhibitory factor, SAPCD2 - suppressor apc domain containing 2, MKS1 - meckel syndrome, type 1, SEMA3C - sema domain, immunoglobulin domain (ig), short basic domain, secreted, (semaphorin) 3c, HES1 - hairy and enhancer of split 1,…
GO:0006950	response to stress	0.000882	0.0391	1.16	12306	2011	1756	333	[BOK - bcl2-related ovarian killer, TRIB3 - tribbles homolog 3 (drosophila), RFC4 - replication factor c (activator 1) 4, 37kda, GFPT1 - glutamine--fructose-6-phosphate transaminase 1, RFC5 - replication factor c (activator 1) 5, 36.5kda, RFC2 - replication factor c (activator 1) 2, 40kda, RFC3 - replication factor c (activator 1) 3, 38kda, MAP3K8 - mitogen-activated protein kinase kinase kinase …
GO:0044087	regulation of cellular component biogenesis	0.0009	0.0398	1.3	12306	661	1756	123	[PHLDB2 - pleckstrin homology-like domain, family b, member 2, PDLIM5 - pdz and lim domain 5, SPIRE1 - spire actin nucleation factor 1, BRCA1 - breast cancer 1, early onset, CDT1 - chromatin licensing and dna replication factor 1, LRRC16A - leucine rich repeat containing 16a, ANLN - anillin, actin binding protein, PODXL - podocalyxin-like, ABI2 - abl-interactor 2, RDX - radixin, AGRN - agrin, MDM…
GO:0034616	response to laminar fluid shear stress	0.000926	0.0409	3.77	12306	13	1756	7	[TGFB3 - transforming growth factor, beta 3, TGFB1 - transforming growth factor, beta 1, SMAD6 - smad family member 6, ASS1 - argininosuccinate synthase 1, KLF2 - kruppel-like factor 2 (lung), SMAD7 - smad family member 7, KLF4 - kruppel-like factor 4 (gut)]
GO:0060033	anatomical structure regression	0.000961	0.0423	5.01	12306	7	1756	5	[GLI2 - gli family zinc finger 2, BMPR1A - bone morphogenetic protein receptor, type ia, LEF1 - lymphoid enhancer-binding factor 1, SMAD5 - smad family member 5, NINJ1 - ninjurin 1]
GO:0046602	regulation of mitotic centrosome separation	0.000961	0.0421	5.01	12306	7	1756	5	[KIF11 - kinesin family member 11, CEP85 - centrosomal protein 85kda, CHEK1 - checkpoint kinase 1, NEK2 - nima-related kinase 2, MAP9 - microtubule-associated protein 9]
GO:0071559	response to transforming growth factor beta	0.000969	0.0424	2.21	12306	54	1756	17	[FGFR2 - fibroblast growth factor receptor 2, TGFBR1 - transforming growth factor, beta receptor 1, TGFB1 - transforming growth factor, beta 1, PENK - proenkephalin, SOX9 - sry (sex determining region y)-box 9, SOX6 - sry (sex determining region y)-box 6, ANKRD1 - ankyrin repeat domain 1 (cardiac muscle), NR3C1 - nuclear receptor subfamily 3, group c, member 1 (glucocorticoid receptor), COL1A1 - …
GO:0061035	regulation of cartilage development	0.000969	0.0422	2.21	12306	54	1756	17	[TGFBR1 - transforming growth factor, beta receptor 1, SMAD1 - smad family member 1, TGFB1 - transforming growth factor, beta 1, SOX9 - sry (sex determining region y)-box 9, SOX6 - sry (sex determining region y)-box 6, RUNX2 - runt-related transcription factor 2, SHOX2 - short stature homeobox 2, CTGF - connective tissue growth factor, FRZB - frizzled-related protein, GREM1 - gremlin 1, dan famil…
GO:0031023	microtubule organizing center organization	0.000985	0.0428	2.34	12306	45	1756	15	[CDK5RAP2 - cdk5 regulatory subunit associated protein 2, PLK1 - polo-like kinase 1, PCM1 - pericentriolar material 1, CEP68 - centrosomal protein 68kda, PPP1R12A - protein phosphatase 1, regulatory subunit 12a, HAUS3 - haus augmin-like complex, subunit 3, BRCA1 - breast cancer 1, early onset, PLK4 - polo-like kinase 4, SDCCAG8 - serologically defined colon cancer antigen 8, KIAA0101 - kiaa0101, …
GO:0050926	regulation of positive chemotaxis	0.000987	0.0427	2.92	12306	24	1756	10	[FIGF - c-fos induced growth factor (vascular endothelial growth factor d), VEGFA - vascular endothelial growth factor a, S1PR1 - sphingosine-1-phosphate receptor 1, VEGFC - vascular endothelial growth factor c, NTF3 - neurotrophin 3, CDH13 - cadherin 13, h-cadherin (heart), F2RL1 - coagulation factor ii (thrombin) receptor-like 1, F3 - coagulation factor iii (thromboplastin, tissue factor), ANGP…
GO:0051130	positive regulation of cellular component organization	0.000993	0.0429	1.25	12306	919	1756	164	[BOK - bcl2-related ovarian killer, PHLDB2 - pleckstrin homology-like domain, family b, member 2, CDC20 - cell division cycle 20, TNFRSF12A - tumor necrosis factor receptor superfamily, member 12a, SPIRE1 - spire actin nucleation factor 1, CDT1 - chromatin licensing and dna replication factor 1, NAF1 - nuclear assembly factor 1 ribonucleoprotein, BRCA1 - breast cancer 1, early onset, LRRC16A - le…

## Sheet: Fig3A,C
TPM VALUES AND MEANS FOR THREE REPLICATES
	Treatment	No treament				8-br-cAMP/MPA				PGE2/MPA
ENSEMBL GENE ID	Gene Name	Rep1	Rep2	Rep3	Mean	Rep1	Rep2	Rep3	Mean	Rep1	Rep2	Rep3	Mean
ENSMODG00000018886	PLA2G7	89.2364	85.8331	111.186	95.4186	27.5948	28.2157	25.0187	26.9431	5.8677	6.49487	5.75045	6.03767
ENSMODG00000011791	PLA2G4A	60.8559	62.9416	51.6314	58.4763	6.85056	8.59592	8.3828	7.94309	2.01396	2.42465	2.67607	2.37156
ENSMODG00000006844	TBXA2R	58.2034	51.6854	63.9313	57.94	0.127356	0.242901	0.308674	0.22631	7.1299	6.64067	6.80577	6.85878
ENSMODG00000019692	PTGS1	99.619	91.4801	102.964	98.021	28.4287	26.1031	27.0491	27.1936	35.1568	37.5033	33.9351	35.5317
ENSMODG00000011721	PTGS2	133.066	136.213	98.15	122.476	1.25886	1.75207	2.80373	1.93822	0.719147	1.31471	0.769227	0.934361
ENSMODG00000005748	PTGES2	16.8664	17.4445	17.5008	17.2706	20.8645	16.4524	17.0101	18.109	11.1861	12.7893	12.0641	12.0132
ENSMODG00000019855	PTGES3	266.378	253.426	271.842	263.882	263.251	257.791	251.862	257.635	481.993	481.523	491.468	484.995
ENSMODG00000006776	PTGES	47.7813	46.5077	41.3076	45.1989	39.6573	40.6925	42.6762	41.0087	51.6531	68.6816	56.2415	58.8587
ENSMODG00000020306	PTGER4	9.55404	10.1274	8.19477	9.29206	1.49092	1.62133	1.66942	1.59389	12.0136	11.4224	11.3435	11.5932
ENSMODG00000004680	PTGR1	148.678	161.57	136.282	148.843	331.893	312.22	333.306	325.807	1461.85	1538.02	1588.98	1529.62
ENSMODG00000003626	HPGD	1.96841	2.08536	1.30122	1.78499	152.274	149.912	144.343	148.843	120.604	138.961	143.171	134.246
LOG TRANSFORMATION OF ABOVE VALUES
ENSMODG00000018886	PLA2G7	6.47956	6.42346	6.79683		4.78632	4.81843	4.64494		2.55279	2.6993	2.52367
ENSMODG00000011791	PLA2G4A	5.92733	5.97594	5.69018		2.77622	3.10365	3.06743		1.01004	1.27777	1.42012
ENSMODG00000006844	TBXA2R	5.86303	5.69168	5.99845		-2.97306	-2.04156	-1.69585		2.83388	2.73133	2.76676
ENSMODG00000019692	PTGS1	6.63835	6.51539	6.68599		4.82927	4.70615	4.75751		5.13573	5.22895	5.08471
ENSMODG00000011721	PTGS2	7.056	7.08972	6.61692		0.332122	0.809058	1.48735		-0.475642	0.394744	-0.378519
ENSMODG00000005748	PTGES2	4.07608	4.1247	4.12935		4.38298	4.04023	4.08832		3.48364	3.67686	3.59265
ENSMODG00000019855	PTGES3	8.05733	7.98542	8.08662		8.0403	8.01006	7.97649		8.91287	8.91146	8.94095
ENSMODG00000006776	PTGES	5.57837	5.5394	5.36833		5.30951	5.34669	5.41536		5.69078	6.10185	5.81356
ENSMODG00000020306	PTGER4	3.25611	3.34019	3.0347		0.576201	0.697181	0.739346		3.5866	3.51379	3.50379
ENSMODG00000004680	PTGR1	7.21604	7.33601	7.09045		8.37458	8.28642	8.3807		10.5136	10.5869	10.6339
ENSMODG00000003626	HPGD	0.977031	1.06029	0.379861		7.25052	7.22797	7.17335		6.91414	7.11854	7.16159
LOG 2 FOLD CHANGE OF TREATMENT MINUS CONTROL
						(8-br-cAMP/MPA ) - (no treatment)				(PGE2/MPA ) - (no treatment)
						rep1-rep1	rep2-rep2	rep3-rep3	mean	rep1-rep1	rep2-rep2	rep3-rep3	mean
ENSMODG00000018886	PLA2G7					-1.69324	-1.60503	-2.1519	-1.81672	-3.92677	-3.72416	-4.27316	-3.9747
ENSMODG00000011791	PLA2G4A					-3.1511	-2.87229	-2.62274	-2.88205	-4.91729	-4.69817	-4.27006	-4.62851
ENSMODG00000006844	TBXA2R					-8.83609	-7.73324	-7.6943	-8.08788	-3.02915	-2.96036	-3.23169	-3.07373
ENSMODG00000019692	PTGS1					-1.80908	-1.80924	-1.92849	-1.84893	-1.50262	-1.28644	-1.60129	-1.46345
ENSMODG00000011721	PTGS2					-6.72388	-6.28066	-5.12957	-6.0447	-7.53164	-6.69497	-6.99544	-7.07402
ENSMODG00000005748	PTGES2					0.306896	-0.0844709	-0.0410349	0.0604635	-0.592445	-0.447836	-0.536704	-0.525662
ENSMODG00000019855	PTGES3					-0.0170382	0.0246368	-0.110136	-0.034179	0.855534	0.926041	0.854328	0.878635
ENSMODG00000006776	PTGES					-0.26886	-0.192705	0.0470264	-0.13818	0.112409	0.562454	0.445227	0.373364
ENSMODG00000020306	PTGER4					-2.67991	-2.64301	-2.29536	-2.53942	0.330487	0.173606	0.469087	0.324394
ENSMODG00000004680	PTGR1					1.15853	0.950407	1.29026	1.13307	3.29754	3.25084	3.54344	3.36394
ENSMODG00000003626	HPGD					6.27349	6.16767	6.79349	6.41155	5.93711	6.05825	6.78173	6.25903

## Sheet: Fig3B
Mean TPM values of three replicates for each treatment
	Treatment
Gene	No treatment	MPA	8-br-cAMP/MPA	PGE2	PGE2/MPA
PTGDR2	0	0.497983	9.51621	0	0.399006
PTGER1	1.7356	3.00333	2.95443	1.2876	1.90779
PTGER2	0.498018	0.771678	0.30488	0.696914	0.593847
PTGER3	0.141334	0.0437652	0.437292	1.88741	0.187864
PTGER4	9.29206	8.85666	1.59389	23.503	11.5932
PTGIR	1.29727	260.583	60.1929	213.844	206.691
TBXA2R	57.94	48.5351	0.22631	6.85878	10.9198
Square root of the mean TPM values (above) of three replicates for each treatment
PTGDR2	0	0.705679	3.08484	0	0.63167
PTGER1	1.31742	1.73301	1.71885	1.13473	1.38123
PTGER2	0.705704	0.878452	0.55216	0.834814	0.770615
PTGER3	0.375945	0.209201	0.661281	1.37383	0.433433
PTGER4	3.04829	2.97601	1.26249	4.84798	3.40487
PTGIR	1.13898	16.1426	7.75841	14.6234	14.3768
TBXA2R	7.61183	6.96671	0.475721	2.61893	3.3045

## Sheet: Fig3D
Gestational Stage	Replicate 1**	Replicate 2	Mean	Standard Deviation
non-pregnant	113.163	301.244	207.204	94.0407
late gestation (w/o troph)	18244	6214	12229	6015
late gestation (w troph)	20958	10426	15692	5266
**Values listed in ng/mg protein

## Sheet: Fig4A,B,C
TPM VALUES AND MEANS FOR THREE REPLICATES
	Treatment	No treament				8-br-cAMP/MPA				MPA				PGE2				PGE2/MPA
ENSEMBL GENE ID	Gene Name	Rep1	Rep2	Rep3	Mean	Rep1	Rep2	Rep3	Mean	Rep1	Rep2	Rep3	Mean	Rep1	Rep2	Rep3	Mean	Rep1	Rep2	Rep3	Mean
ENSMODG00000009349	ERN1	7.67683	7.88252	8.41679	7.99205	17.4936	17.8001	17.4261	17.5733	10.5382	9.68987	9.32472	9.85093	14.1654	11.9848	12.7366	12.9623	10.0534	11.63	12.063	11.2488
ENSMODG00000019764	HSPA5	850.889	857.985	774.663	827.845	2278.83	2427.81	2853.59	2520.08	611.435	517.965	683.175	604.192	1274.09	1169.26	1190.46	1211.27	901.131	886.473	900.021	895.875
ENSMODG00000002234	HSP90B1	508.358	541.163	491.96	513.827	2202.63	2384.86	2760.89	2449.46	437.27	383.878	458.248	426.466	937.229	816.237	858.875	870.78	826.172	879.2	949.413	884.928
ENSMODG00000011773	HSP90AA1	2.74628	3.67509	3.05756	3.15965	8.01562	4.77746	7.42024	6.73777	10.8875	11.191	11.4048	11.1611	7.86848	11.4063	9.87951	9.71808	11.0661	10.1068	9.69615	10.2897
ENSMODG00000011530	CALR	624.407	630.381	609.757	621.515	1656.36	1766.36	1810.32	1744.34	734.232	659.859	679.73	691.274	852.865	823.339	845.653	840.619	803.216	803.216	801.635	802.689
ENSMODG00000009624	NFE2L2	59.683	63.5312	60.1148	61.1097	37.7181	39.8095	36.821	38.1162	68.8736	69.2811	67.6279	68.5942	86.6218	87.1008	81.9208	85.2145	57.2718	54.692	56.6622	56.2087
ENSMODG00000004740	GCLM	115.006	114.521	101.759	110.429	335.323	300.525	345.578	327.142	123.152	115.445	109.575	116.057	127.128	115.846	114.428	119.134	216.022	240.298	250.868	235.729
ENSMODG00000009333	GPX3	4.6213	4.07292	4.00175	4.23199	73.222	72.6213	68.0103	71.2845	108.887	119.37	71.4606	99.9058	9.57438	10.267	9.81188	9.88441	536.717	417.219	420.26	458.065
ENSMODG00000005486	GPX4	703.046	715.393	791.415	736.618	3025.89	3160.01	2640.2	2942.03	1706.18	1869.56	1589.81	1721.85	1478.29	1543.16	1582.35	1534.6	3343.11	3543.43	3409.94	3432.16
ENSMODG00000019004	GSR	241.528	235.463	239.256	238.749	289.201	293.725	288.415	290.447	186.288	175.178	214.444	191.97	580.571	577.234	589.599	582.468	348.292	383.222	380.714	370.743
ENSMODG00000001876	GSTM3	120.813	123.904	121.755	122.157	1022.49	1017.12	865.299	968.304	130.156	146.143	127.515	134.605	76.1592	81.2677	80.2495	79.2255	123.776	129.963	111.75	121.83
ENSMODG00000002382	PRDX1	1893.02	1942.9	1849.12	1895.01	5792.8	5916.84	5528.84	5746.16	1219.35	1205.42	1530.21	1318.32	3949.8	4241.14	4319.12	4170.02	3259.59	4061.37	3615.22	3645.39
ENSMODG00000009286	PRDX3	59.9557	56.9404	51.6623	56.1861	373.633	329.971	324.567	342.724	49.0172	47.37	48.065	48.1507	66.4929	66.0357	67.5411	66.6899	73.2221	71.0683	80.2825	74.8576
ENSMODG00000007799	PRDX4	270.731	268.926	275.211	271.623	532.624	508.033	516.858	519.171	270.377	294.542	270.804	278.574	110.47	125.295	117.801	117.855	266.619	297.998	254.854	273.157
ENSMODG00000021041	SOD1	691.121	698.148	596.759	662.009	1661.28	1468.13	1451.84	1527.08	843.659	936.978	881.184	887.274	829.777	1055.16	1038.63	974.523	1456.4	1460.04	1211.81	1376.09
ENSMODG00000007521	SOD2	33.2188	32.6761	29.7315	31.8754	43.7159	44.2742	36.1396	41.3766	42.0888	48.636	43.1836	44.6362	48.1991	45.337	46.3904	46.6422	53.0443	53.9574	50.4108	52.4708
ENSMODG00000000474	SOD3	105.26	125.561	110.746	113.856	194.465	244.217	194.506	211.063	544.278	698.791	329.1	524.057	75.5218	74.8327	90.0093	80.1213	505.389	401.033	448.53	451.65
ENSMODG00000009956	CAT	18.1841	16.0877	15.5324	16.6014	52.003	49.7604	45.8124	49.1919	22.5852	25.548	19.4836	22.539	79.473	78.6537	83.5169	80.5478	157.68	131.704	142.036	143.807
ENSMODG00000021321	TNFSF10	3.25387	3.22432	2.45007	2.97609	7.33847	8.02859	7.14726	7.50477	3.08083	3.0171	2.17482	2.75758	2.5142	1.98844	2.52743	2.34336	2.80339	2.34753	2.56783	2.57291
ENSMODG00000009216	TNFSRF10	12.1288	13.7349	12.5891	12.8176	18.6154	17.7522	19.2538	18.5405	8.15661	7.03644	8.29165	7.82824	22.3718	19.961	18.0211	20.1179	15.5426	12.5713	13.4545	13.8561
ENSMODG00000018801	MCL1	524.266	487.322	539.616	517.068	255.316	230.589	245.267	243.724	423.857	413.844	419.215	418.972	254.577	285.096	283.637	274.436	317.863	321.538	296.773	312.058
ENSMODG00000006716	BCL2L11	9.30241	9.96138	9.2758	9.5132	23.9372	19.2556	27.1008	23.4312	16.6708	20.6663	14.6473	17.3281	32.3961	30.6078	30.0967	31.0335	47.2562	41.2411	43.1748	43.8907
ENSMODG00000018456	BCL2L13	20.9302	22.0509	21.5555	21.5122	33.6697	31.0665	28.3866	31.0409	14.7491	15.8243	13.9534	14.8423	21.2755	20.0825	19.8665	20.4082	28.252	27.9504	27.3916	27.8647
ENSMODG00000000788	GADD45A	88.3429	86.4005	111.11	95.2843	609.29	556.473	479.104	548.289	103.937	130.018	88.6092	107.522	24.1096	25.8603	32.6174	27.5291	240.748	225.594	221.123	229.155
LOG TRANSFORMATION OF ABOVE VALUES
ENSMODG00000009349	ERN1	2.94051	2.97866	3.07327		4.12875	4.15381	4.12318		3.39756	3.27648	3.22106		3.8243	3.58313	3.67091		3.32962	3.53978	3.59252
ENSMODG00000019764	HSPA5	9.73283	9.74481	9.59743		11.1541	11.2454	11.4786		9.25606	9.01671	9.41611		10.3153	10.1914	10.2173		9.81559	9.79193	9.81381
ENSMODG00000002234	HSP90B1	8.9897	9.07992	8.9424		11.105	11.2197	11.4309		8.77238	8.58451	8.83999		9.87226	9.67284	9.7463		9.6903	9.78005	9.89089
ENSMODG00000011773	HSP90AA1	1.45748	1.87778	1.61238		3.00281	2.25624	2.89147		3.4446	3.48426	3.51157		2.97609	3.51175	3.30444		3.46807	3.33726	3.27741
ENSMODG00000011530	CALR	9.28634	9.30008	9.25209		10.6938	10.7866	10.822		9.52009	9.36601	9.40882		9.73617	9.68534	9.72392		9.64964	9.64964	9.6468
ENSMODG00000009624	NFE2L2	5.89925	5.98939	5.90965		5.23718	5.31504	5.20246		6.10588	6.11439	6.07955		6.43666	6.44461	6.35616		5.83975	5.77326	5.82432
ENSMODG00000004740	GCLM	6.84557	6.83947	6.66901		8.38941	8.23134	8.43287		6.94429	6.85106	6.77577		6.99014	6.85606	6.8383		7.75503	7.90868	7.97078
ENSMODG00000009333	GPX3	2.2083	2.02606	2.00063		6.19421	6.18232	6.08768		6.76669	6.89929	6.15908		3.25918	3.35994	3.29453		9.06802	8.70466	8.71514
ENSMODG00000005486	GPX4	9.45747	9.48259	9.62829		11.5631	11.6257	11.3664		10.7366	10.8685	10.6346		10.5297	10.5917	10.6279		11.707	11.7909	11.7355
ENSMODG00000019004	GSR	7.91604	7.87935	7.90241		8.17593	8.19832	8.172		7.54139	7.45268	7.74446		9.18133	9.17301	9.20359		8.44415	8.58204	8.57257
ENSMODG00000001876	GSTM3	6.91663	6.95308	6.92784		9.99787	9.99028	9.75706		7.0241	7.19124	6.99452		6.25095	6.34461	6.32642		6.95159	7.02196	6.80413
ENSMODG00000002382	PRDX1	10.8865	10.924	10.8526		12.5	12.5306	12.4328		10.2519	10.2353	10.5795		11.9476	12.0502	12.0765		11.6705	11.9878	11.8199
ENSMODG00000009286	PRDX3	5.90583	5.83138	5.69104		8.54548	8.36619	8.34237		5.61522	5.5659	5.58691		6.05513	6.04518	6.07769		6.19421	6.15113	6.32701
ENSMODG00000007799	PRDX4	8.08072	8.07107	8.10439		9.05697	8.98878	9.01362		8.07883	8.20233	8.0811		6.78751	6.96918	6.88021		8.05864	8.21916	7.99353
ENSMODG00000021041	SOD1	9.43279	9.44739	9.221		10.6981	10.5198	10.5037		9.72052	9.87187	9.7833		9.69658	10.0432	10.0205		10.5082	10.5118	10.243
ENSMODG00000007521	SOD2	5.05393	5.03016	4.89392		5.45009	5.46839	5.17551		5.39537	5.60395	5.43241		5.59093	5.50262	5.53575		5.72913	5.75375	5.65566
ENSMODG00000000474	SOD3	6.71781	6.97225	6.79111		7.60337	7.93202	7.60367		9.0882	9.44872	8.36238		6.23882	6.2256	6.492		8.98125	8.64758	8.80906
ENSMODG00000009956	CAT	4.1846	4.00788	3.95721		5.70052	5.63693	5.51766		4.49731	4.67514	4.28419		6.31239	6.29744	6.384		7.30085	7.04116	7.15011
ENSMODG00000021321	TNFSF10	1.70216	1.689	1.29282		2.87548	3.00515	2.83739		1.62332	1.59316	1.1209		1.3301	0.991634	1.33767		1.48717	1.23114	1.36055
ENSMODG00000009216	TNFSRF10	3.60037	3.77977	3.6541		4.21843	4.14993	4.26707		3.02797	2.81485	3.05166		4.48361	4.31911	4.17161		3.95815	3.65206	3.75001
ENSMODG00000018801	MCL1	9.03415	8.92873	9.07579		7.99614	7.84918	7.93821		8.72743	8.69294	8.71155		7.99196	8.1553	8.1479		8.31226	8.32885	8.21322
ENSMODG00000006716	BCL2L11	3.21761	3.31635	3.21347		4.58118	4.26721	4.76026		4.05925	4.36921	3.87256		5.01775	4.93583	4.91153		5.56243	5.36601	5.43212
ENSMODG00000018456	BCL2L13	4.38752	4.46276	4.42998		5.07338	4.95729	4.82714		3.88256	3.98407	3.80255		4.41112	4.32786	4.31227		4.82028	4.8048	4.77566
ENSMODG00000000788	GADD45A	6.46504	6.43297	6.79584		9.25099	9.12017	8.9042		6.69957	7.02257	6.46938		4.59153	4.69267	5.02757		7.91138	7.81758	7.78871
LOG 2 FOLD CHANGE OF TREATMENT MINUS CONTROL
						(8-br-cAMP/MPA ) - (no treatment)				(MPA ) - (no treatment)				(PGE2 ) - (no treatment)				(PGE2/MPA ) - (no treatment)
						rep1-rep1	rep2-rep2	rep3-rep3	mean	rep1-rep1	rep2-rep2	rep3-rep3	mean	rep1-rep1	rep2-rep2	rep3-rep3	mean	rep1-rep1	rep2-rep2	rep3-rep3	mean
ENSMODG00000009349	ERN1					1.18824	1.17516	1.04991	1.13777	0.457045	0.297822	0.14779	0.300885	0.883785	0.604474	0.597642	0.6953	0.389107	0.561128	0.519247	0.489828
ENSMODG00000019764	HSPA5					1.42125	1.50063	1.88114	1.60101	-0.476771	-0.728097	-0.181314	-0.462061	0.582424	0.446572	0.61988	0.549625	0.0827669	0.0471242	0.216389	0.115427
ENSMODG00000002234	HSP90B1					2.11531	2.13977	2.48852	2.24787	-0.21732	-0.495415	-0.10241	-0.271715	0.882556	0.592923	0.803907	0.759796	0.700597	0.700127	0.948495	0.783073
ENSMODG00000011773	HSP90AA1					1.54533	0.378465	1.27908	1.06763	1.98712	1.60648	1.89918	1.83093	1.51861	1.63398	1.69206	1.61488	2.01059	1.45948	1.66503	1.7117
ENSMODG00000011530	CALR					1.40745	1.48648	1.56994	1.48796	0.233749	0.065932	0.156728	0.152136	0.44983	0.385262	0.471832	0.435642	0.363301	0.349564	0.394711	0.369192
ENSMODG00000009624	NFE2L2					-0.662065	-0.674351	-0.707192	-0.681203	0.20663	0.124997	0.169899	0.167175	0.53741	0.455221	0.44651	0.479714	-0.0594963	-0.216134	-0.0853319	-0.120321
ENSMODG00000004740	GCLM					1.54384	1.39188	1.76386	1.56653	0.0987251	0.0115976	0.106762	0.0723615	0.144573	0.0165971	0.169288	0.110152	0.909467	1.06922	1.30178	1.09349
ENSMODG00000009333	GPX3					3.98591	4.15626	4.08705	4.07641	4.55839	4.87323	4.15844	4.53002	1.05088	1.33387	1.2939	1.22622	6.85972	6.6786	6.71451	6.75094
ENSMODG00000005486	GPX4					2.10567	2.14312	1.73814	1.99564	1.27908	1.38589	1.00635	1.22377	1.07224	1.10908	0.999566	1.06029	2.2495	2.30834	2.10724	2.22169
ENSMODG00000019004	GSR					0.259883	0.318968	0.269591	0.282814	-0.374656	-0.426676	-0.157953	-0.319762	1.26528	1.29366	1.30118	1.28671	0.52811	0.702683	0.670152	0.633648
ENSMODG00000001876	GSTM3					3.08124	3.0372	2.82922	2.98255	0.107472	0.23816	0.0666826	0.137438	-0.665681	-0.608466	-0.601418	-0.625188	0.034966	0.068885	-0.123707	-0.00661874
ENSMODG00000002382	PRDX1					1.61357	1.60661	1.58014	1.60011	-0.634577	-0.688684	-0.273111	-0.532124	1.06109	1.12624	1.2239	1.13708	0.784004	1.06375	0.967244	0.938334
ENSMODG00000009286	PRDX3					2.63965	2.53481	2.65133	2.6086	-0.29061	-0.265481	-0.104126	-0.220072	0.149304	0.213794	0.386654	0.249917	0.288382	0.319753	0.635973	0.414703
ENSMODG00000007799	PRDX4					0.976257	0.917711	0.909229	0.934399	-0.00188649	0.131262	-0.0232913	0.0353614	-1.29321	-1.10188	-1.22419	-1.20643	-0.0220795	0.148094	-0.110864	0.00505006
ENSMODG00000021041	SOD1					1.26528	1.07237	1.28266	1.20677	0.287722	0.424483	0.562297	0.424834	0.263786	0.595855	0.799467	0.553036	1.0754	1.0644	1.02195	1.05392
ENSMODG00000007521	SOD2					0.396159	0.438229	0.28159	0.371993	0.341438	0.57379	0.538493	0.484574	0.537006	0.472455	0.641836	0.550432	0.6752	0.723585	0.761742	0.720175
ENSMODG00000000474	SOD3					0.885559	0.959771	0.812556	0.885962	2.37039	2.47647	1.57127	2.13938	-0.47899	-0.746651	-0.299109	-0.50825	2.26344	1.67533	2.01795	1.98557
ENSMODG00000009956	CAT					1.51592	1.62904	1.56046	1.56847	0.312706	0.667255	0.326983	0.435648	2.12779	2.28956	2.42679	2.28138	3.11625	3.03327	3.1929	3.11414
ENSMODG00000021321	TNFSF10					1.17332	1.31615	1.54457	1.34468	-0.0788372	-0.0958359	-0.171928	-0.115534	-0.372059	-0.697362	0.04485	-0.341524	-0.214985	-0.457855	0.0677236	-0.201706
ENSMODG00000009216	TNFSRF10					0.618062	0.370159	0.612971	0.533731	-0.572396	-0.964924	-0.602443	-0.713255	0.88324	0.539338	0.517511	0.646696	0.357785	-0.127706	0.0959115	0.108663
ENSMODG00000018801	MCL1					-1.03801	-1.07955	-1.13758	-1.08505	-0.306722	-0.235787	-0.364242	-0.30225	-1.0422	-0.773428	-0.92789	-0.914505	-0.721894	-0.599885	-0.862573	-0.728117
ENSMODG00000006716	BCL2L11					1.36358	0.950862	1.54679	1.28708	0.841644	1.05286	0.659091	0.851199	1.80014	1.61948	1.69806	1.7059	2.34483	2.04966	2.21865	2.20438
ENSMODG00000018456	BCL2L13					0.685863	0.494525	0.397156	0.525848	-0.504962	-0.478696	-0.627436	-0.537031	0.023604	-0.134898	-0.117715	-0.0763364	0.432766	0.342034	0.345679	0.373493
ENSMODG00000000788	GADD45A					2.78594	2.6872	2.10836	2.52717	0.234525	0.589604	-0.326455	0.165891	-1.87351	-1.7403	-1.76827	-1.79403	1.44634	1.38462	0.992867	1.27461

## Sheet: Fig6B,C
ROS & PI in FOXO KDs and stimulated MdESF
FACS Analysis
Rep 1: 9/15/17						Rep 2: 9/26/17						Rep 3: 10/3/17
		GROWTH	cAMP + MPA	PGE2 + MPA				GROWTH	cAMP + MPA	PGE2 + MPA				GROWTH	cAMP + MPA	PGE2 + MPA
Q1	ROS	0.8	2.8	1.1		Q1	ROS	0.3	25.4	10.1	***	Q1	ROS	0.4	4.7	2.6
Q2	ROS + PI	0.2	3.1	0.8		Q2	ROS + PI	0.4	3	1.4		Q2	ROS + PI	0.2	3.6	1.6
Q1+Q2		1	5.9	1.9		Q1+Q2		0.7	28.4	11.5		Q1+Q2		0.6	8.3	4.2
Q3	Healthy	98.3	89.4	96.1		Q3	Healthy	98	69	86.8		Q3	Healthy	98.3	85.3	93.9
Q4	PI	0.8	4.7	2		Q4	PI	1.3	2.6	1.8		Q4	PI	1	6.4	2
Q2+Q4		1	7.8	2.8		Q2+Q4		1.7	5.6	3.2		Q2+Q4		1.2	10	3.6
FOXO1 KD
		GROWTH	cAMP + MPA	PGE2 + MPA				GROWTH	cAMP + MPA	PGE2 + MPA				GROWTH	cAMP + MPA	PGE2 + MPA
Q1	ROS	0.1	2.7	0.7		Q1	ROS	1.8	9.1	4.4		Q1	ROS	0.7	12.4	5
Q2	ROS + PI	0.3	3.9	1.2		Q2	ROS + PI	0.8	6.6	3.1		Q2	ROS + PI	1	9.3	3.5
Q1+Q2		0.4	6.6	1.9		Q1+Q2		2.6	15.7	7.5		Q1+Q2		1.7	21.7	8.5
Q3	Healthy	94.9	79.4	92		Q3	Healthy	95.6	77	89.2		Q3	Healthy	93.4	68.8	85.2
Q4	PI	4.7	14	6		Q4	PI	2.6	7.4	3.3		Q4	PI	4.9	9.6	6.3
Q2+Q4		5	17.9	7.2		Q2+Q4		3.4	14	6.4		Q2+Q4		5.9	18.9	9.8
FOXO3 KD
		GROWTH	cAMP + MPA	PGE2 + MPA				GROWTH	cAMP + MPA	PGE2 + MPA				GROWTH	cAMP + MPA	PGE2 + MPA
Q1	ROS	0.2	2.4	1.5		Q1	ROS	2.4	6	3.5		Q1	ROS	2.5	8.5	2.8
Q2	ROS + PI	0.3	4	1.5		Q2	ROS + PI	1.3	4.8	2.4		Q2	ROS + PI	1.6	6.5	1.9
Q1+Q2		0.5	6.4	3		Q1+Q2		3.7	10.8	5.9		Q1+Q2		4.1	15	4.7
Q3	Healthy	97.1	83.5	92		Q3	Healthy	94.6	83.6	91.1		Q3	Healthy	93	77.6	90.6
Q4	PI	2.4	10.1	5		Q4	PI	1.7	5.6	3.1		Q4	PI	2.9	7.5	4.7
Q2+Q4		2.7	14.1	6.5		Q2+Q4		3	10.4	5.5		Q2+Q4		4.5	14	6.6
***This ROS replicate was excluded from the statistical analyses due to excessive incubation with the H2DCFDA reagent

## Sheet: Fig S2A
DSCtranscriptionfactor	Average_undiff_TPM	Average_cAMP_MPA	Av_MdESF_PGE2_MPA	SEM_undiff_TPM	SEM cAMP_MPA	SEM_PGE2_MPA
CEBPB	211.037	312.852	370.009	11.6784	10.8979	20.2524
E2F8	4.79312	0.067972	0.265453	0.494404	0.00808896	0.0558049
EBF4	35.3185	20.273	37.9151	1.45738	0.589764	0.524331
ETS1	88.0791	76.044	88.491	2.39814	0.537587	2.47161
FOS	45.9194	27.6978	71.2636	2.77168	0.760277	0.907812
FOXM1	4.28176	0.210293	0.305158	0.191101	0.0477565	0.0832284
FOXO1	14.4078	81.4368	98.3811	0.456122	0.584983	0.851236
GATA2	43.1388	67.8226	23.0068	2.12586	2.95096	0.557669
HAND2	16.2461	97.5988	30.989	0.109417	2.09737	0.50167
HoxA10	22.0462	187.999	66.4821	0.635008	8.96192	1.37339
HOXA11	40.6049	168.051	83.4853	0.840404	5.42643	2.11728
HoxD11	1.29366	0.0529438	0	0.0825302	0.021835	0
HoxD12	0	0	0	0	0	0
HoxD9	3.34679	0.837986	0.546067	0.100787	0.0178424	0.0182465
KLF9	7.58237	65.4861	83.3119	0.860208	4.28567	0.882502
MEIS1	66.9478	140.682	90.731	2.46443	4.02017	1.92509
NR2F2	17.5185	41.0034	33.6502	0.379183	1.08207	1.09562
NR4A2	0.956747	25.0819	14.0318	0.0310153	0.911584	0.285136
Pbx2	82.3533	41.8699	79.7626	1.75929	1.6861	1.12875
PGR	66.5584	257.878	123.665	1.29179	6.40943	2.68327
Prrx2	21.9743	3.91719	12.599	1.54864	0.199677	0.0443663
Runx1	66.026	21.3385	30.0596	2.5156	0.253087	0.487171
STAT3	129.484	170.615	161.742	3.10061	1.70994	2.08054
Stat5B	18.9148	17.6475	23.4626	0.207309	0.927856	0.332724
TFAP2C	0.560346	0.295768	2.23973	0.0784125	0.0379038	0.0781792
TWIST1	78.4769	81.019	118.435	5.70982	4.38536	4.84668
WT1	126.883	80.8986	54.4583	1.69581	1.18558	2.47686
ZBTB16	0.306444	57.7928	92.0595	0.0312908	1.35232	1.31758

## Sheet: Fig S2B
Glucocorticoid receptor knockdown, 3 replicates, fold change shown
	GR	IGFBP3	FOXO3	FOXO1	PGR	ZBTB16
Rep1	0.10772	0.769783	0.54099	0.983643	1.07102	0.449362
Rep2	0.177556	1.06653	1.29844	0.873878	0.934545	1.19265
Rep3	0.115118	1.08373	0.705067	0.870395	1.24584	0.874117
Average	0.133465	0.973348	0.848166	0.909305	1.0838	0.838709
SD	0.0383626	0.176502	0.398486	0.064402	0.156039	0.372906

## Sheet: Fig S2C
Sample Name	Target Name	Cт	Cт Mean	Cт SD	ΔCт	ΔCт Mean	ΔCт SE	Fold change	ΔΔCт
GROWTH	TBP	23.8731	23.8728	0.0697322
GROWTH	TBP	23.9424	23.8728	0.0697322
GROWTH	TBP	23.803	23.8728	0.0697322
GROWTH	CEBPB	23.704	23.666	0.0436013		-0.206889	0.0474821		0
GROWTH	CEBPB	23.6755	23.666	0.0436013		-0.206889	0.0474821		0
GROWTH	CEBPB	23.6184	23.666	0.0436013		-0.206889	0.0474821		0
GROWTH	HOXA10	32.6367	32.5298	0.463511		8.65699	0.27062		0
GROWTH	HOXA10	33.311	32.7902	0.463511		8.91739	0.27062		0
GROWTH	HOXA10	32.423	32.7902	0.463511		8.91739	0.27062		0
GROWTH	HOXA11	31.8797	31.8511	0.33881		7.97824	0.199712		0
GROWTH	HOXA11	31.4989	31.8511	0.33881		7.97824	0.199712		0
GROWTH	HOXA11	32.1747	31.8511	0.33881		7.97824	0.199712		0
GROWTH	FOXO1	23.9048	23.8808	0.0288132		0.00796318	0.0435614		0
GROWTH	FOXO1	23.8488	23.8808	0.0288132		0.00796318	0.0435614		0
GROWTH	FOXO1	23.8888	23.8808	0.0288132		0.00796318	0.0435614		0
GROWTH	PGR	22.5016	22.4535	0.0482825		-1.41936	0.0489686		0
GROWTH	PGR	22.4538	22.4535	0.0482825		-1.41936	0.0489686		0
GROWTH	PGR	22.405	22.4535	0.0482825		-1.41936	0.0489686		0
GROWTH	ZBTB16	32.3373	32.1919	0.204679		8.31902	0.124841		0
GROWTH	ZBTB16	31.9578	32.1919	0.204679		8.31902	0.124841		0
GROWTH	ZBTB16	32.2805	32.1919	0.204679		8.31902	0.124841		0
cAMP	TBP	23.9577	23.998	0.0594755
cAMP	TBP	24.0663	23.998	0.0594755
cAMP	TBP	23.97	23.998	0.0594755
cAMP	CEBPB	22.1174	22.1211	0.0194088		-1.87692	0.0361204	3.18222	-1.67004
cAMP	CEBPB	22.1421	22.1211	0.0194088		-1.87692	0.0361204		-1.67004
cAMP	CEBPB	22.1038	22.1211	0.0194088		-1.87692	0.0361204		-1.67004
cAMP	HOXA10	33.1178	33.5116	0.341109		9.5136	0.199911	0.682032	0.596208
cAMP	HOXA10	33.716	33.5116	0.341109		9.5136	0.199911		0.596208
cAMP	HOXA10	33.7011	33.5116	0.341109		9.5136	0.199911		0.596208
cAMP	HOXA11	33.913	34.4847	0.51351		10.4867	0.298457	0.199877	2.50844
cAMP	HOXA11	34.6343	34.4847	0.51351		10.4867	0.298457		2.50844
cAMP	HOXA11	34.9068	34.4847	0.51351		10.4867	0.298457		2.50844
cAMP	FOXO1	22.7067	22.6931	0.0227621		-1.30495	0.0367671	2.32263	-1.31292
cAMP	FOXO1	22.7057	22.6931	0.0227621		-1.30495	0.0367671		-1.31292
cAMP	FOXO1	22.6668	22.6931	0.0227621		-1.30495	0.0367671		-1.31292
cAMP	PGR	22.6453	22.6646	0.0195667		-1.33343	0.0361488	0.946341	0.0859267
cAMP	PGR	22.6844	22.6646	0.0195667		-1.33343	0.0361488		0.0859267
cAMP	PGR	22.664	22.6646	0.0195667		-1.33343	0.0361488		0.0859267
cAMP	ZBTB16	24.3909	24.3959	0.0874359		0.397884	0.0610529	161.452	-7.92113
cAMP	ZBTB16	24.3111	24.3959	0.0874359		0.397884	0.0610529		-7.92113
cAMP	ZBTB16	24.4857	24.3959	0.0874359		0.397884	0.0610529		-7.92113
PGE2	TBP	24.2848	24.2345	0.0518074
PGE2	TBP	24.2373	24.2345	0.0518074
PGE2	TBP	24.1813	24.2345	0.0518074
PGE2	CEBPB	22.916	22.8639	0.0516392		-1.37057	0.042232	2.24028	-1.16368
PGE2	CEBPB	22.863	22.8639	0.0516392		-1.37057	0.042232		-1.16368
PGE2	CEBPB	22.8127	22.8639	0.0516392		-1.37057	0.042232		-1.16368
PGE2	HOXA10	31.8838	31.8977	0.261327		7.66321	0.153813	#REF!	-1.10352
PGE2	HOXA10	32.3497	32.0484	0.261327		7.81387	0.153813		-1.10352
PGE2	HOXA10	31.9116	32.0484	0.261327		7.81387	0.153813		-1.10352
PGE2	HOXA11	32.9426	33.3168	0.56179		9.08232	0.325726	0.492305	1.10408
PGE2	HOXA11	33.9628	33.3168	0.56179		9.08232	0.325726		1.10408
PGE2	HOXA11	33.045	33.3168	0.56179		9.08232	0.325726		1.10408
PGE2	FOXO1	23.7233	23.6827	0.0362921		-0.551748	0.03652	1.43226	-0.559711
PGE2	FOXO1	23.6717	23.6827	0.0362921		-0.551748	0.03652		-0.559711
PGE2	FOXO1	23.6533	23.6827	0.0362921		-0.551748	0.03652		-0.559711
PGE2	PGR	22.8135	22.8782	0.0591242		-1.35633	0.045386	0.960352	0.0630283
PGE2	PGR	22.9295	22.8782	0.0591242		-1.35633	0.045386		0.0630283
PGE2	PGR	22.8915	22.8782	0.0591242		-1.35633	0.045386		0.0630283
PGE2	ZBTB16	24.9015	24.9222	0.0195471		0.687748	0.0319693	134.043	-7.63127
PGE2	ZBTB16	24.9247	24.9222	0.0195471		0.687748	0.0319693		-7.63127
PGE2	ZBTB16	24.9404	24.9222	0.0195471		0.687748	0.0319693		-7.63127

[truncated: 1 more sheets: Fig S7B]
